# Supplementary material for: An Ecological Study of Tuberculosis Incidence in China, From 2002 to 2018
Source: Frontiers journal article supplement (doi:10.3389/fpubh.2021.766362), 2022-01-18
Supplement: Table_1.XLS [file Table_1.XLS]

## Sheet: Sheet1
area	year	y1	y2	y3	resources1	resources2	economy1	economy2	lifecare1	lifecare2	lifecare3	lifecare4	economy7	environment6	environment7	environment8	environment9	population1	population2	economy5	population3	environment1	resources3	economy3	economy4	environment2	environment3	environment4	lifecare5	lifecare6	lifecare9	lifecare10	lifecare11	lifecare12	lifecare13	environment5	lifecare8	lifecare7	economy6	id	y20	y30
ShangHai	2002	31.87	0.01	0.08	5.62	4.69	13249.8	6223.6	733.4	280.2	7	5.3	2041	17.5	73	1435.4	1780	1625	96.73	4.8	1959	16.4	1.82	40627	90.3	192064	44.7	10.7	87.12	16.79	10.7	338.64	633.36	591.72	68.16	95	16.36	8.25	8.18	ShangHai	0.01	0.08
ShangHai	2003	35.65	0.08	0.13	5.61	4.69	14867.5	6653.9	602.7	332.8	5.5	5.9	2212	17	75	756.9	1714	1711	99.82	4.9	1971	16.78	2.58	46718	89.9	190997	45	11.5	76.6	16.37	7.51	336.3	618.8	534.09	65.73	97	16.11	7.4	5.88	ShangHai	0.08	0.13
ShangHai	2004	50.7	0.12	0.25	5.39	0.23	16682.8	7066.3	761.7	424.6	6	6.7	3694	17.5	72	1061	1965	1742	96.62	4.4	1970	18.24	2.51	55307	89.5	193325	47.3	11.8	66.78	15.28	5.62	345.5	638.95	564.55	72.44	99	15.5	5.12	6.54	ShangHai	0.12	0.25
ShangHai	2005	35.52	0.11	0.19	5.81	4.85	18645	8247.8	796.8	561.7	5.8	7.7	3838	17.1	70	1059.8	1829	1778	101.27		2718	12.95	2.47	51583	89.1	199710	51.3	11.6	70.59	19.47	7.66	382.63	695.41	573.26	76.69	88	19.12	8.9	5.24	ShangHai	0.11	0.19
ShangHai	2006	32.38	0.14	0.27	5.55	5.14	20667.9	9138.7	762.9	549.4	5.2	6.9	4206	17.9	70	1149.7	1678.1	1964	98.71	4.4	2774	12.52	2.32	57310	88.7	223755	50.8	11.3	68.71	20.02	7.68	402.28	684.17	595.27	72.48	86	20.64	7.72	4.92	ShangHai	0.14	0.27
ShangHai	2007	38.58	0.12	0.23	5.61	3.38	23622.7	10144.6	857.1	571.1	5	6.5	4206	18.2	68.8	1290.4	1616.9	2064	99.29	4.2	2930	12.41	2.37	65347	88.7	226615	49.8	10.6	71.56	18.1	7.93	442.96	907.66	669.24	89.05	88	19.4	8.4	4.04	ShangHai	0.12	0.23
ShangHai	2008	38.55	0.08	0.14	5.68	3.02	26674.9	11440.3	755.3	697.1	3.9	7.6	4317	17.2	70	1086.5	1635.7	2141	100.18	4.2	2978	12.51	3.67	73124	88.6	223751	44.6	10.7	65.58	17.19	8.36	508.4	1127.7	708.05	99.19	84	18.2	9.18	3.97	ShangHai	0.08	0.14
ShangHai	2009	35.69	0.12	0.26	5.83	2.58	28837.8	12482.9	1002.1	738.9	4.8	7.5	4393	17.4	70	1289.4	1680.9	2210	98.95	4.3	3030	12.76	3.79	78225	88.6	230518	37.9	10.1	64.76	19.08	8.45	549.79	1071.59	727.56	105.99	81	18.46	9.25	3.81	ShangHai	0.12	0.26
ShangHai	2010	34.33	0.19	0.42	6.18	2.65	31838.1	13978	1005.5	584.5	4.3	5.7	4393	17.2	69	1128.9	1662	2303	106.18	4.4	3630	8.82	3.75	78989	89.3	248250	35.8	10.2	65.01	18.94	8.07	622.01	1136.23	817.64	117.29	79	17.21	8.42	3.105	ShangHai	0.19	0.42
ShangHai	2011	30.38	0.16	0.38	7.68	4.99	36230.5	16053.8	1140.8	908.6	4.5	8.2	3556	16.9	69	1009.1	1663.7	2347	113.09	3.5	3702	11.79	3.79	82011	89.3	214155	24.01	8.98	69.26	21.65	8.58	672.39	1344.65	912.35	144.47	80	18.56	8.63	2.4	ShangHai	0.16	0.38
ShangHai	2012	29.67	0.12	0.3	7.86	4.48	40188.3	17803.7	1016.7	1029	3.9	8.6	3481	16.9	70	1103.7	1676.7	2380	108.78	3.1	3754	11.91	2.34	85033	89.3	219244	22.82	8.71	72.23	21.71	8.92	761.58	1447.45	1011.4	149.84	71	18.43	9.46	2.23	ShangHai	0.12	0.3
ShangHai	2013	29.52	0.11	0.3	8.15	4.7	43851.4	19595	1350.3	1990.9	4.8	14	3421	17.6	68	1173.4	1864.7	2415	106.24	4	3809	12.11	4.05	90092	89.6	222963	21.58	8.09	77.82	24.4733	9.28	850.77	1550.25	1110.45	155.21	84	19.0867	10.6067	3.64	ShangHai	0.11	0.3
ShangHai	2014	28.74	0.08	0.22	8.34	4.52	48841.4	21191.6	2327.6	1330.3	6.6	9	3330	17	73	1295.3	1612.6	2426	106.7	4.1	3826	11.97	2.52	97343	89.6	221160	18.81	14.17	83.41	27.2367	9.64	939.96	1653.05	1209.5	160.58	71	19.7433	11.7533	3.15	ShangHai	0.08	0.22
ShangHai	2015	27.56	0.08	0.2	8.68	4.65	52961.9	23205.2	2839.9	1707.1	6.4	9.1	3327	17	74	1648.8	1495.6	2415	108.37	4	3809	12.36	2.6	103141	87.6	224147	17.08	12.07	89	30	10	1029.15	1755.85	1308.55	165.95	69	20.4	12.9	3.12	ShangHai	0.08	0.2
ShangHai	2016	27.28	0.13	0.18	9.11	4.7	57691.7	25520.4	2839.9	1707.1	7.1	10	3327	17.6	75	1596.1	1668.6	2420	105.87	4.1	3816	12.7	2.7	113615	87.9	220759	7.42	7.95	83.9	30.4	10.2	1118.34	1858.65	1407.6	171.32	59	22.2	14.1	3.11	ShangHai	0.13	0.18
ShangHai	2017	26.55	0.1		9.46	4.74	62595.7	27825	2734.7	1456.4	6.5	8.1	3498	17.7	71	1388.8	1809.2	2418	103.54	3.9	3814	13.94	2.81	124571	87.7	211951	1.85	4.7	86.4	31.1	10	1207.53	1961.45	1506.65	176.69	55	22.3	13.4	2.29	ShangHai	0.1	0.16
ShangHai	2018	26.14	0.09		9.72	4.51	68033.6	30374.7	3221.8	1739.5	7	8.7	3517	17.7	74	1408.8	1835.8	2424	106.61	3.5	3823	9.04	2.95	134982	88.1	203143	0.96	1.45	99.9	39.2	12.6	1296.72	2064.25	1605.7	182.06	51	24.8	14.8	2.38	ShangHai	0.09	0.14
YunNan	2002	51.73	0.92	2.64	4.17	1.59	7240.6	1608.6	466.2	69	8	5	331	16.1	65	949	2121	4333	106.62	4	361	9.2	2.85	5178	26.5	66271	36.4	17.6	102.49	24.11	1.73	248.76	473.64	71.04	49.08	87	1.25	2.35	8.87	YunNan	0.92	2.64
YunNan	2003	55.08	0.79	2.24	4.23	1.56	7643.6	1697.1	545.8	79.9	9.1	5.7	400	16.4	65	832.4	2295	4376	109.34	4.1	375	8.68	1.21	5647	27.5	68181	45.3	17	90.8	26.41	1.56	262.13	469.94	78.42	53.42	86	1.21	2.67	9.11	YunNan	0.79	2.24
YunNan	2004	53.67	0.16	0.52	1.02	1.23	8870.9	1864.2	623.2	87.7	9.1	5.6	799	15.6	66	1093.7	2104.1	4415	102.44	4.3	373	8.89	1.21	6733	28.5	78303	47.8	18.4	97.66	25.67	1.41	304.49	503.86	91.85	58.67	85	1.15	2.58	7.35	YunNan	0.16	0.52
YunNan	2005	73.12	0.4	1.04	4.87	1.58	9265.9	2041.8	663	122.3	9.5	6.8	904	16.7	62	976	2054.3	4450	106.57	4.2	497	9.03	1.25	7826	29.5	75202	52.2	22.7	98.3	28.51	1.67	347.85	522.97	93.37	61.32	82	1.06	2.93	9.76	YunNan	0.4	1.04
YunNan	2006	60.42	0.13	0.37	4.77	1.64	10069.9	2250.5	600.1	138.2	8.1	6.3	1042	16.4	69	993.6	2270.4	4483	107.15	4.3	3080	9.69	1.26	8961	30.5	80478	55.1	21.8	93.08	31.05	1.86	338.86	497.35	87.54	60.32	91	1.31	3.01	9.5	YunNan	0.13	0.37
YunNan	2007	62.12	0.12	0.34	5.06	1.78	11496.1	2634.1	631.7	167.9	8	6.4	1042	15.6	71.8	932.7	2038.6	4514	106.32	4.2	3322	10.81	1.25	10496	31.6	83759	53.4	20.9	86.44	29.15	1.87	380.77	671.59	94.61	67.14	75	1.58	3.23	8.54	YunNan	0.12	0.34
YunNan	2008	62.22	0.07	0.21	5.26	1.92	13250.2	3102.6	606.9	182	6.7	6.1	1081	15.4	70	982.2	1921	4543	108.3	4.2	3386	11.01	1.3	12587	33	83865	50.2	20.5	97.84	27.95	2.41	471.39	892.68	114.89	78.26	67	1.72	4.87	8.65	YunNan	0.07	0.21
YunNan	2009	59.29	0.16	0.6	5.72	2.1	14423.9	3369.3	708.8	197.6	6.9	6.8	1298	16.6	66	565.8	2211.1	4571	108	4.3	3561	9.8	1.35	13536	34	87590	49.9	17.9	105.65	27.95	2.27	522.17	822.08	120.81	76.73	67	1.61	4.38	7.8	YunNan	0.16	0.6
YunNan	2010	55.6	0.29	1.12	6.64	2.72	16064.5	3952	637.9	239.9	5.8	7.1	1298	16.7	66	869.1	2136.8	4602	107.84	4.2	3795	9.74	1.4	13539	34.7	91992	50.1	13.8	91.48	29.8	2.11	562.9	882.9	122.38	72.53	72	1.58	4.46	6.31	YunNan	0.29	1.12
YunNan	2011	58.01	0.18	0.67	7.97	3.16	18575.6	4722	822.4	309.3	6.7	7.7	1520	15.5	71	659	2052.8	4631	104.1	4.1	3811	10.06	1.42	17867	36.8	147523	69.12	38.22	100.48	28.44	2.45	614.03	1031.71	96.68	67.41	65	1.75	5.27	4.82	YunNan	0.18	0.67
YunNan	2012	59.58	0.21	0.88	8.69	3.57	21074.5	5416.5	939.1	362.6	6.8	8	1566	16.3	67	802.1	2554.2	4659	105.88	4	4029	10.25	1.47	22195	39.3	154010	67.22	39.06	96.94	27.12	2.82	744.88	1138.47	116.62	69.72	67	1.89	5.59	4.45	YunNan	0.21	0.88
YunNan	2013	56.81	0.16	0.73	8.9	3.87	23235.5	6141.3	1085.5	352.9	7.2	7.4	1662	16	68	804.7	2512.5	4687	107.56	4	2415	11.61	1.63	25083	40.5	156583	66.31	38.69	94.5267	27.8467	3.34667	875.73	1245.23	136.56	72.03	82	2.02667	5.99333	4.76	YunNan	0.16	0.73
YunNan	2014	56.01	0.16	0.73	9.53	4.12	24299	7456.1	1115.2	514	6.9	8.5	1819	16.4	66	1078.3	2636.4	4714	105.4	4	2853	12.36	1.6	27264	41.7	157544	63.67	36.68	92.1133	28.5733	3.87333	1006.58	1351.99	156.5	74.34	70	2.16333	6.39667	7.18	YunNan	0.16	0.73
YunNan	2015	54.42	0.15		10.23	4.31	26373.2	8242.1	1526.7	620.1	7.6	8.5	1889	16.2	70	1190.7	2388.9	4742	104.98	4	2943	12.62	1.7	29015	43.3	173333	58.37	31.26	89.7	29.3	4.4	1137.43	1458.75	176.44	76.65	56	2.3	6.8	9.53	YunNan	0.15	0.73
YunNan	2016	154.37	0.06		10.62	4.52	28610.6	9019.8	1526.7	620.1	8.2	8.5	1889	15.8	73	1150.2	2128.4	4771	102.16	3.6	2995	13.17	1.8	31264.7	45	181089	52.62	24.76	89.5	29.9	4.3	1268.28	1565.51	196.38	78.96	55	2.5	7.6	8.83	YunNan	0.06	0.73
YunNan	2017	57.53	0.05		11.42	4.85	30995.9	9862.2	1786.6	681.5	9.1	8.5	1999	15.7	73	1186.4	2349	4801	107.41	3.2	3000	13.6	1.96	34545	46.7	185112	38.44	22.42	79.7	30.8	3.9	1399.13	1672.27	216.32	81.27	58	2.4	7.2	8.39	YunNan	0.05	0.73
YunNan	2018	59.61	0.08		10.36	5.23	33487.9	10767.9	1875	845.6	8.7	9.3	2166	15.7	71	1085.2	2266.8	4830	107.67	3.4	3021	12.97	2.06	37136	47.8	189135	24.26	20.08	75.1	33.1	3.9	1529.98	1779.03	236.26	83.58	55	2.3	6.4	8.14	YunNan	0.08	0.73
Inner Mongolia	2002	41.43	0.01	0.05	4.39	1.6	6051	2086	343.4	116.8	7.1	7.1	508	8	45	482.7	2579	2379	105.84	4.1	508	3.9	2.22	7233	43	47660	73.1	42.4	75.08	18.6	3.48	138.6	305.04	40.2	43.92	152	1.52	1.2	13.46	Inner Mongolia	0.01	0.05
Inner Mongolia	2003	46.38	0.01	0.02	4.35	1.62	7012.9	2267.7	425.9	124.4	7.9	7	662	7.1	55	653.1	2474	2380	104.36	4.5	537	4.03	2.07	8734	44.4	50790	128.8	47.9	70.77	21.18	3.82	156.04	344.86	43.24	47.33	116	1.45	1.41	13.67	Inner Mongolia	0.01	0.02
Inner Mongolia	2004	79.56	0.04	0.07	1.56	1.03	8123	2606.4	473.6	154.5	7.6	7.4	1141	8	48	423.6	2758	2384	105.74	4.6	545	5.22	2.1	11305	45.8	52568	117.9	66.2	75.39	25.26	3.9	188.91	364.6	44.08	47.37	80	1.49	1.61	10.46	Inner Mongolia	0.04	0.07
Inner Mongolia	2005	107.66	0.09	0.15	4.72	1.61	9136.8	2988.9	533.4	176.4	7.7	7.2	1303	7.7	46	248.3	2816.8	2386	104.69	4.3	538	5.61	2.11	16067	47.2	56241	145.6	77.9	76.93	26.26	4.29	169.5	384.4	50.08	51.16	97	1.56	2.25	11.25	Inner Mongolia	0.09	0.15
Inner Mongolia	2006	90.05	0.09	0.15	4.72	1.62	10358	3341.9	555	232.8	7.2	8.4	1413	8.6	47	290.8	2667.9	2415	104.05	4.1	598	6.08	2.09	20047	48.6	61509	155.7	66	77.94	25.75	4.51	191.41	371.25	50.02	45.49	102	1.72	1.63	9.36	Inner Mongolia	0.09	0.15
Inner Mongolia	2007	90.58	0.1	0.15	4.71	1.63	12377.8	3953.1	719.1	281.5	7.7	8.6	1413	9	46.9	261.2	2647.8	2429	103.08	4	622	6.9	1.99	25092	50.2	60405	145.6	66.4	77.74	23.62	4.38	225.99	501.26	55.12	55.87	84	1.93	2.06	8.23	Inner Mongolia	0.1	0.15
Inner Mongolia	2008	88.11	0.07	0.11	5.17	1.8	14432.6	4656.2	869.7	320.6	8	8.9	1507	7.4	50	571	2510.9	2444	105.21	4.1	649	7.5	2.03	32214	51.7	70421	143.1	57.8	79.25	22.73	5.92	290.43	712.61	97.9	62.41	70	1.88	2.66	8.14	Inner Mongolia	0.07	0.11
Inner Mongolia	2009	82.05	0.1	0.15	5.43	1.89	15849.2	4937.8	992.7	416.9	8	10.5	1794	8	44	265	2574.1	2458	105.01	4	951	7.5	2.82	40225	53.4	73155	139.9	49.4	70.9	27.96	5.36	306.3	650.78	87.51	60.55	74	2.06	2.79	7.49	Inner Mongolia	0.1	0.15
Inner Mongolia	2010	74.07	0.05	0.08	6.6	2.36	17698.2	5529.6	1126	468	8	10.5	1794	7.6	46	469.5	2516.5	2472	108.05	3.9	981	6.89	2.29	40282	55.5	92548	139.4	64.7	67.9	25.41	4.67	353.14	761.02	102.05	66.43	68	1.97	2.66	5.93	Inner Mongolia	0.05	0.08
Inner Mongolia	2011	66.55	0.04	0.08	7.25	2.91	20407.6	6641.6	1239.4	534.2	7.8	9.7	1920	7.9	42	177.1	2629.4	2482	98.85	3.8	764	7.2	2.32	52300.5	56.6	100389	140.94	73.99	63.04	26.18	5.13	403.33	925.73	111.97	82.42	76	2.12	3.46	4.37	Inner Mongolia	0.04	0.08
Inner Mongolia	2012	67.39	0.06	0.11	8.65	3.13	23150.3	7611.3	1354.1	588.9	7.6	9.2	2042	7.2	47	551.4	2677.8	2490	104.44	3.7	1032	7.05	2.39	64319	57.7	102424	138.49	83.3	68.74	26.18	6.45	457.17	990.75	144.44	83.19	91	2.06	3.52	4.01	Inner Mongolia	0.06	0.11
Inner Mongolia	2013	57.87	0.05	0.1	9.3	3.38	25496.7	8595.7	1394.8	831.2	7.2	11.4	2137	7.3	50	564.6	2629.8	2498	107.91	3.7	1059	8.57	2.52	67498	58.7	106920	135.87	82.21	68.96	26.3533	6.73333	511.01	1055.77	176.91	83.96	146	2.24	3.64667	4.27	Inner Mongolia	0.05	0.1
Inner Mongolia	2014	49.14	0.04	0.07	9.15	3.75	28349.6	9976.3	1470.8	1114.4	7	11.2	2035	7.7	46	394.8	2517.2	2505	103.9	3.6	1291	9.01	2.48	71044	59.5	111917	131.24	102.15	69.18	26.5267	7.01667	564.85	1120.79	209.38	84.73	122	2.42	3.77333	4.66	Inner Mongolia	0.04	0.07
Inner Mongolia	2015	47.71	0.04		9.7	3.84	30594.1	10775.9	1840.2	1187.7	7.2	10.5	1937	7.7	47	361.9	2666.3	2511	104.32	3.7	1629	9.1	2.6	71903	60.3	110861	123.09	87.88	69.4	26.7	7.3	618.69	1185.81	241.85	85.5	103	2.6	3.9	5.47	Inner Mongolia	0.04	0.06
Inner Mongolia	2016	48.3	0.06		10.22	3.94	32974.9	11609	1840.2	1187.7	8.1	10.4	1937	7.1	49	531.3	2838.4	2520	102.05	3.7	1822	10.26	2.63	74068.5	61.2	104696	62.57	59.9	83.8	28.6	6.8	672.53	1250.83	274.32	86.27	95	3	4.9	4.66	Inner Mongolia	0.06	0.058
Inner Mongolia	2017	49.19	0.07		10.51	4.39	35670	12584.3	1907.3	1288.4	8.1	10.6	1969	7.7	44	325.3	2746.4	2529	100.79	3.6	1824	10.65	2.78	63786	62	104251	54.63	53.62	69.8	31.6	7.2	726.37	1315.85	306.79	87.04	95	3	4.4	4.82	Inner Mongolia	0.07	0.05
Inner Mongolia	2018	54.09	0.1		11.3	4.66	38304.7	13802.6	2105.7	1468.5	8.6	11.6	1984	7.3	45	580.8	2588.2	2534	104.26	3.6	1846	10.18	2.9	68302	62.7	103806	46.69	47.34	82.2	33.4	7.2	780.21	1380.87	339.26	87.81	86	3.8	4.9	4.58	Inner Mongolia	0.1	0.04
Bei Jing	2002	17.88	0.02	0.07	6.97	1.4	12463.9	5398.5	949.9	337.9	9.2	9.1	2781	13.1	49	370.1	2508	1423	112.29	1.4	2099	21.6	2.66	27746	81.5	93573	19.2	8.1	104.09	15.03	2.63	248.64	565.92	163.44	70.44	133	4.24	3.57	5.35	Bei Jing	0.02	0.07
Bei Jing	2003	20.91	0.02	0.07	6.77	1.39	13882.6	5601.6	994	356.3	8.9	8.6	3121	12.8	54	444.5	2260	1456	106.08	1.4	2128	26.37	3.28	31613	82.2	93753	18.3	7.1	92.78	14.6	10.13	266.62	575.01	160.94	71.8	141	4.25	2.17	4.61	Bei Jing	0.02	0.07
Bei Jing	2004	48.36	0.04	0.07	6.14	0.16	15637.8	6170.3	1182.8	507.6	9.7	11	6204	13.5	49	483.5	2515.4	1493	105.01	1.3	2623	22.75	3.29	37058	82.9	98063	19.1	7	86.44	14.85	9.24	287.14	613.89	165.2	78.6	149	3.88	1.86	4.48	Bei Jing	0.04	0.07
Bei Jing	2005	57.04	0.1	0.12	6.61	2.91	17653	7346.3	1295.8	504.2	9.8	9.5	6580	13.2	49	410.7	2576.1	1538	102.65	2.1	937	17.64	3.29	44441	83.6	101009	19.1	5.8	92.41	17.41	9.32	294.87	649.66	174	82.42	141	4.89	2.93	3.92	Bei Jing	0.1	0.12
Bei Jing	2006	51.29	0.13	0.18	6.78	2.88	19977.5	8275.5	1322.4	575.8	8.9	10.1	6897	13.4	53	318	2192.7	1601	97.21	2	1094	22.19	3.3	49505	84.3	104994	17.6	5	91.46	19.24	9.23	314.29	631.25	182.87	77.01	162	5.4	2.57	4.47	Bei Jing	0.13	0.18
Bei Jing	2007	51.96	0.38	0.42	6.86	2.38	21988.7	9439.6	1294.1	629.6	8.4	9.8	6897	14	54	483.9	2351.1	1676	99.06	1.8	1132	21.56	3.3	56044	84.5	107816	15.2	4.9	94.85	16.68	9.2	365.67	819.14	208.82	99.47	148	5.12	2.91	3.34	Bei Jing	0.38	0.42
Bei Jing	2008	58.64	0.09	0.12	6.92	2.21	24724.9	10661.9	1563.1	709.4	9.5	9.7	6826	13.4	52	626.3	2391.4	1771	103.38	1.8	1181	24.67	4.79	63029	84.9	113259	12.3	4.8	92.94	15.89	10.12	428.94	970.46	220.76	104.12	123	4.93	3.41	3.11	Bei Jing	0.09	0.12
Bei Jing	2009	47.37	0.1	0.14	7.07	2.39	26738.5	11668.6	1389.5	867.9	7.8	9.8	6410	13.3	51	480.6	2511.8	1860	104.27	1.4	1224	24.75	5.04	68788	85	140813	11.9	4.4	96.25	18.2	10.88	441.52	901.95	245.96	106.47	121	5.65	3.29	2.75	Bei Jing	0.1	0.14
Bei Jing	2010	45.7	0.09	0.13	7.05	2.53	29072.9	13262.3	1327.2	840.6	6.7	9.1	6410	12.6	51	522.5	2382.9	1962	106.75	1.4	1383	14.24	5.24	70452	86	136415	11.5	4.8	94.21	17.86	10	530.94	909.54	250.95	120.22	121	4.77	3.06	2.24	Bei Jing	0.09	0.13
Bei Jing	2011	41.29	0.06	0.1	7.62	3.51	32903	14735.7	1523.3	1035.2	6.9	9.3	5613	13.4	49	720.6	2485.7	2019	104.09	1.4	1428	22.38	5.45	78771.5	86.2	145469	9.79	6.58	108.99	19.43	10.82	536.87	1045.05	254.38	146.78	113	5.41	3.99	1.73	Bei Jing	0.06	0.1
Bei Jing	2012	40.72	0.04	0.08	7.94	3.61	36468.8	16475.7	1658.4	1125.2	6.9	9.5	5534	12.9	51	733.2	2450.2	2069	105.18	1.3	1464	23.43	3.59	87091	86.2	140274	9.38	6.68	100.47	19.13	11.05	583.57	1084.73	296.17	146.93	109	5.33	3.96	1.46	Bei Jing	0.04	0.08
Bei Jing	2013	35.9	0.05	0.09	8.15	3.47	40321	18337.5	1717.6	1167.1	6.5	8.6	5469	12.8	55	579.1	2371.1	2115	107.62	1.2	1498	24.39	5.85	93213	86.3	144580	8.7	5.93	97.3133	20.42	11.2667	630.27	1124.41	337.96	147.08	108	5.42	4.04	1.52	Bei Jing	0.05	0.09
Bei Jing	2014	34.38	0.05	0.11	8.46	3.74	48531.8	18867.3	2044.4	1088.6	6.1	7.5	5218	14.1	52	461.5	2344.1	2152	102.24	1.3	1525	24.84	3.72	99995	86.4	150714	7.89	5.74	94.1567	21.71	11.4833	676.97	1164.09	379.75	147.23	116	5.51	4.12	1.48	Bei Jing	0.05	0.11
Bei Jing	2015	31.97	0.07		8.43	3.68	52859.2	20568.7	2629.8	1347	6.5	8.4	5028	13.7	55	458.6	2420.3	2171	109.45	1.4	1541	24.58	3.9	106284	86.5	151733	7.12	4.94	91	23	11.7	723.67	1203.77	421.54	147.38	102	5.6	4.2	1.72	Bei Jing	0.07	0.13
Bei Jing	2016	31.01	0.08		8.64	3.67	57275.3	22309.5	2629.8	1347	6.9	7.8	5028	13.8	52	669.1	2502.1	2173	105.85	1.4	1145	24.31	4.11	114653	86.5	166419	3.32	3.45	92.7	22.9	11.8	770.37	1243.45	463.33	147.53	92	5.7	4.4	1.56	Bei Jing	0.08	0.15
Bei Jing	2017	32.74	0.1		8.66	3.72	62406.3	24240.5	3088	1699.3	7.7	9	5300	14.2	50	576.2	2600.1	2171	102.65	1.4	1144	26.55	4.35	128927	86.5	133188	2.01	2.04	88.7	22.2	11.8	817.07	1283.13	505.12	147.68	84	5.6	4	1.23	Bei Jing	0.1	0.17
Bei Jing	2018	30.43	0.08		8.69	3.85	67989.9	26490.3	3475.8	1991.9	8.1	9.9	5268	13.6	49	546.6	2475.4	2154	98.75	1.4	1136	18.24	2.63	140211	86.5	99957	0.7	0.63	106.6	27.7	14.4	863.77	1322.81	546.91	147.83	78	7	5.3	1.69	Bei Jing	0.08	0.19
Ji Lin	2002	59.03	0.02	0.05	3.6	1.83	6260.2	2301	430.4	132.1	8.7	7.9	981	6.8	55	489.9	2608	2699	101.67	3.6	822	6.6	2.38	8322	51	85325	26.5	30.3	116.56	12.05	7.67	198.36	333.72	100.92	56.76	111	3.73	2.05	4.36	Ji Lin	0.02	0.05
Ji Lin	2003	68.71	0.05	0.11	3.61	1.89	7005.2	2530.4	462.1	153.7	8.4	8.5	1181	7	57	517.2	2500	2704	100.67	4.3	756	7.13	2.11	9334	51.5	82491	27.2	28.8	115.2	11.42	8.64	221.99	347.02	102.1	60.38	98	3.6	3.23	3.89	Ji Lin	0.05	0.11
Ji Lin	2004	85.62	0.1	0.13	2.46	0.59	7840.6	2999.6	527.3	161.2	8.7	8.2	1898	7.1	58	476.2	2602.6	2709	100.43	4.2	771	7.09	2.15	10932	52	86923	28.5	33.9	141.17	11.56	8.53	251.87	376.8	104.82	61.1	85	3.47	4.06	3.85	Ji Lin	0.1	0.13
Ji Lin	2005	99.6	0.41	0.39	3.65	1.88	8690.6	3264	675.8	193.6	9.9	8.4	2144	5.6	61	681	2324.6	2716	103.15	4.2	785	7.28	2.08	13350	52.5	98005	38.2	41.3	138.09	14.41	8.6	273.87	415.01	113.03	65.43	99	4.02	4.29	5.85	Ji Lin	0.41	0.39
Ji Lin	2006	83.56	0.34	0.38	3.75	1.99	9775.1	3641.1	671.4	256.3	9.1	9.5	2359	6.6	59	632.6	2424.9	2723	102.42	4.2	1547	7.65	2.17	15625	53	97166	40.9	41.7	140.65	13.47	8.2	284.29	402.42	115.51	59.91	99	4.23	3.66	5.21	Ji Lin	0.34	0.38
Ji Lin	2007	72.57	0.38	0.42	3.92	1.97	11285.5	4191.3	854.8	311.4	10	10.2	2359	7.7	57.6	534.2	2533.6	2730	102.64	3.9	1504	8.68	2.09	19168	53.2	97857	39.9	38.5	132.48	10.58	7.49	338.96	510.2	135.22	75.66	99	4.41	3.89	4.55	Ji Lin	0.38	0.42
Ji Lin	2008	80.45	0.29	0.33	4.08	2.06	12829.5	4932.7	914.5	380.7	9.4	11.1	2493	7.2	59	716.8	2380.9	2734	102.37	4	1368	9.27	2.12	23514	53.2	107781	37.8	37.4	113.23	9.62	9.21	406.74	633.76	155.69	83.56	96	4.16	3.73	4.44	Ji Lin	0.29	0.33
Ji Lin	2009	87.39	0.28	0.34	4.35	2.25	14006.3	5265.5	1120.4	511.5	10.3	13.1	2695	6.1	60	481	2417.3	2740	104.89	4	1396	9.56	2.21	26319	53.3	109714	36.3	38.4	99.25	11.32	8.56	446.09	663.97	180.51	103.15	85	4.04	3.55	3.43	Ji Lin	0.28	0.34
Ji Lin	2010	83.79	0.18	0.25	6.25	2.82	15411.5	6237.4	1171.3	462.4	10	11.1	2695	5.2	66	878.3	2295	2747	102.67	3.8	1449	9.75	2.28	26595	53.4	114431	35.6	30.1	107.8	11.74	7.42	462.56	657.07	173.7	89.84	89	3.8	2.71	2.835	Ji Lin	0.18	0.25
Ji Lin	2011	77.94	0.13	0.2	6.84	3.32	17796.6	7510	1108.5	673.6	8.5	12.7	2807	5.9	61	468.4	2699.6	2749	104.48	3.7	2371	9.31	2.19	35003.5	53.4	116162	41.32	43.22	119.75	13.19	8.71	452.21	736.97	178.78	93.62	91	4.3	4.2	2.24	Ji Lin	0.13	0.2
Ji Lin	2012	70	0.16	0.23	7.25	3.54	20208	8598.2	1447.5	840.5	9.9	13.6	2889	5.2	63	718.3	2438.3	2750	103.47	3.7	2878	9.75	2.23	43412	53.7	119509	40.35	26.48	127.72	13.75	7.9	489.5	803.19	208.16	99.27	87	4.06	4.31	1.85	Ji Lin	0.16	0.23
Ji Lin	2013	62.03	0.11	0.19	13.43	3.05	22274.6	9621.2	1692.1	968.6	10.6	13.1	3033	5.6	64	736.5	2396.4	2751	106.23	3.7	3135	10.21	2.31	47191	54.2	117703	38.15	32.02	115.08	15.1333	8.1	526.79	869.41	237.54	104.92	130	4.34	4.10667	2.27	Ji Lin	0.11	0.19
Ji Lin	2014	60.66	0.1	0.21	8.75	3.71	23217.8	10780.1	1838.4	1008	10.7	12.4	3169	7.1	57	446	2674.5	2752	103.65	3.4	3171	10.32	2.3	50162	54.8	122171	37.23	47.51	102.44	16.5167	8.3	564.08	935.63	266.92	110.57	118	4.62	3.90333	2.88	Ji Lin	0.1	0.21
Ji Lin	2015	56.45	0.16		9.33	3.69	24900.9	11326.2	2059.2	1230.5	10.7	12	3048	7.2	60	530.5	2695.7	2753	102.02	3.5	3193	10.62	2.4	51852	55.3	126908	36.29	44.73	89.8	17.9	8.5	601.37	1001.85	296.3	116.22	107	4.9	3.7	2.61	Ji Lin	0.16	0.23
Ji Lin	2016	49.76	0.08		9.43	4.01	26530.4	12122.9	2059.2	1230.5	10.7	12.9	3048	6.6	63	890.8	2711.2	2733	103.41	3.5	2231	10.26	2.55	54266.4	56	97073	18.81	21.87	93.8	16.8	9.2	638.66	1068.07	325.68	121.87	78	5.1	4.7	2.47	Ji Lin	0.08	0.25
Ji Lin	2017	50.3	0.08		8.03	4.36	28318.7	12950.4	2164	1399.6	10.8	13.6	3038	7	60	694.3	2801.6	2717	102.42	3.5	2284	11.15	2.6	56102	56.7	121464	16.61	19.57	115.4	19.5	9.8	675.95	1134.29	355.06	127.52	78	4.7	5	3.5	Ji Lin	0.08	0.27
Ji Lin	2018	47.43	0.22		10.19	4.64	30171.9	13748.2	2469.2	1450.9	11	13.4	3131	6.8	59	607.3	2455.6	2704	102.03	3.5	1831	10.73	2.85	55611	57.5	145855	14.41	17.27	86.6	25.1	9.2	713.24	1200.51	384.44	133.17	61	5.5	4.9	2.8	Ji Lin	0.22	0.29
Si Chuan	2002	82.55	0.01	0.04	3.07	1.49	6610.8	2107.6	361.4	78.3	6.7	4.9	475	17.4	75	681.6	979	8673	100.57	4.5	515	3	6.69	5766	29.1	227067	111.7	85.2	146.98	25.33	3.64	212.04	531.36	69.24	58.92	121	1.55	2.81	7.01	Si Chuan	0.01	0.04
Si Chuan	2003	103.57	0.03	0.07	3.16	1.44	7041.9	2229.9	425.1	91.4	7.4	5.2	589	17.2	74	741.1	819	8700	102.95	4.4	237	7.35	1.33	6418	30.4	228414	120.7	83.4	180.65	28.05	4.73	236.66	535.32	68.47	58.15	118	1.91	3.59	7.55	Si Chuan	0.03	0.07
Si Chuan	2004	127.49	0.12	0.21	1.19	0.92	7709.9	2518.9	433.4	117.4	6.8	5.8	1006	16.2	77	1060.4	984	8725	101.84	4.4	241	7.57	1.3	8113	31.7	241720	126.4	86.5	173.01	28.99	4.84	258.46	605.6	76.53	65.59	115	1.92	3.88	6.92	Si Chuan	0.12	0.21
Si Chuan	2005	104.6	0.27	0.49	3.28	1.45	8386	2802.8	442.8	144.5	6.4	6.4	1204	16.2	78	765.6	777	8212	99.44	4.6	255	7.63	1.38	9020	33	261651	129.9	79.1	155.89	31.59	4.84	274.23	657.71	82.82	68.98	125	2.19	4.4	6	Si Chuan	0.27	0.49
Si Chuan	2006	99.21	0.24	0.43	3.36	1.48	9350.1	3002.4	449.9	160.3	6	6.7	1414	16.9	77	704.4	1092.6	8169	103.23	4.5	2653	8.24	1.4	10546	34.3	252375	128.1	61.3	147.35	29.93	4.91	297.83	601.84	83.28	63.93	123	2.3	4.09	5.11	Si Chuan	0.24	0.43
Si Chuan	2007	102.78	0.36	0.63	3.57	1.55	11098.3	3546.7	511.8	174.8	5.9	6.4	1414	16.8	76.7	624.5	935.6	8127	101.14	4.2	2587	9.64	1.44	12893	35.6	252962	117.9	45.9	132.33	26.92	4.82	393.25	897.33	99.57	78.93	111	2.63	4.73	4.12	Si Chuan	0.36	0.63
Si Chuan	2008	95.77	0.35	0.58	3.9	1.8	12633.4	4121.2	564.9	209.2	5.8	6.7	1500	16.3	75	1028.2	928.4	8138	102.64	4.6	2677	11.06	1.37	15378	37.4	262343	114.8	32.6	115.09	24.94	4.57	477.88	1181.73	126.16	90.46	111	2.73	5.68	4.02	Si Chuan	0.35	0.58
Si Chuan	2009	86.77	0.33	0.55	4.38	2	13839.4	4462.1	648.3	285.1	6	6.2	1732	16.8	74	724.2	840.2	8185	100.93	4.3	2737	11.18	1.54	17339	38.7	262709	113.5	28.5	121.85	26.95	4.55	571.09	1100.29	144.56	93.79	111	2.68	5.54	3.63	Si Chuan	0.33	0.55
Si Chuan	2010	81.74	0.28	0.46	4.36	2.7	15461.2	5086.9	661	276.1	5.5	7.1	1732	16	79	936.8	789	8045	103.14	4.1	2743	9.65	1.61	17339	40.2	256095	113.1	34.2	122.76	27.8	4.2	580.03	1177.98	144.56	93.47	104	2.62	5.18	3.34	Si Chuan	0.28	0.46
Si Chuan	2011	78.84	0.2	0.29	5.26	3.12	17899.1	6128.6	735.3	413.1	5.4	8.8	1904	15.9	74	1003.2	926.3	8050	104.43	4.2	2782	12.6	1.7	23459	41.8	279852	90.2	38.59	114.3	26.69	4.69	608.9	1473.67	161.85	113.44	100	2.57	5.94	3.05	Si Chuan	0.2	0.29
Si Chuan	2012	77.93	0.31	0.44	6.17	3.6	20307	7001.4	772.8	498.3	5.1	9.3	2037	15.9	78	610.9	780.6	8076	109.96	4	2866	13.34	2.02	29579	43.5	283657	86.44	29.58	116.4	26.11	4.87	710.36	1512.48	185.4	120.48	119	2.55	5.88	2.79	Si Chuan	0.31	0.44
Si Chuan	2013	75.35	0.36	0.6	6.82	3.88	22367.6	7895.3	1019	557.4	6.2	8.8	2140	16.9	77	1343.3	1128.8	8107	104.02	4.1	2900	14.59	1.9	32454	44.9	307648	81.67	29.6	119.267	29.4733	6.04667	811.82	1551.29	208.95	127.52	150	3.33333	6.98667	2.8	Si Chuan	0.36	0.6
Si Chuan	2014	69.68	0.17	0.3	7.26	4.16	24234.4	9347.7	1283.6	723.7	7.2	8.7	2312	16	82	975	875.8	8140	98.23	4.2	3068	14.22	2.21	35128	46.3	331277	79.64	42.86	122.133	32.8367	7.22333	913.28	1590.1	232.5	134.56	123	4.11667	8.09333	4.42	Si Chuan	0.17	0.3
Si Chuan	2015	67.13	0.23		7.79	4.43	26205.3	10247.8	1423.4	972.5	7.1	9.1	2314	16.8	81	880.2	1038.4	8204	100.89	4.1	1902	13.52	2.2	36836	47.7	341607	71.76	41.26	125	36.2	8.4	1014.74	1628.91	256.05	141.6	108	4.9	9.2	8.14	Si Chuan	0.23	0.35
Si Chuan	2016	130.66	0.24		7.62	4.81	28335.3	11203.1	1423.4	972.5	6.9	9.5	2314	16.8	82	983.9	1088.5	8262	99.73	4.2	2901	12.9	2.24	39694.5	49.2	352826	48.83	27.27	122.6	33.2	8.6	1116.2	1667.72	279.6	148.64	105	5.6	10	8.22	Si Chuan	0.24	0.3
Si Chuan	2017	63.12	0.34		7.95	5.3	30726.9	12226.9	1595.6	1093.6	7.3	9.6	2339	16.6	81	966.9	1156.7	8302	101.93	4	2962	14.46	2.35	44651	50.8	362438	38.91	22.4	126.8	38.9	8.9	1217.66	1706.53	303.15	155.68	88	6.1	10.1	7.05	Si Chuan	0.34	0.32
Si Chuan	2018	57.34	0.49		8.43	5.64	33215.9	13331.4	1832.2	1344.8	7.8	10.6	2409	16.5	82	1250.4	1202.7	8341	98.67	3.5	3068	13.18	2.46	48883	52.3	372050	28.99	17.53	113.5	45.2	8.4	1319.12	1745.34	326.7	162.72	81	5.4	9.5	7.49	Si Chuan	0.49	0.33
Tian Jin	2002	34.95	0.02	0.03	5.79	0.87	9337.6	4278.7	625	188.7	8.7	8.7	1955	13.2	61	375.8	2061	1007	98.7	3.9	831	9.3	1.42	22068	73.3	49709	23.5	9.6	90.78	10.65	9.98	210.48	427.08	231.84	86.76	155	7.09	0.73	6.74	Tian Jin	0.02	0.03
Tian Jin	2003	35.13	0.02	0.03	4.64	1.58	10312.9	4566	697.8	167.7	8.9	7.2	2425	12.7	64	668	1994	1011	97.44	3.8	841	9.38	2.55	25874	73.9	46329	25.9	10.3	69.99	11.07	10.8	249.97	479.36	271.92	93.27	133	8.35	0.84	6.36	Tian Jin	0.02	0.03
Tian Jin	2004	31.27	0.1	0.12	3.84	0.3	11467.2	5019.5	824	177.1	9.4	6.7	3845	13.2	59	490.5	2126.1	1024	98.37	3.8	852	10.67	2.46	31550	74.5	48671	22.8	8.5	81.31	10.55	10.18	264.78	510.38	277.42	102.01	111	7.24	0.85	5.39	Tian Jin	0.1	0.12
Tian Jin	2005	38.55	0.25	0.25	4.74	1.7	12638.6	5579.9	996.4	179.2	10.3	5.9	4340	12.9	57	618.5	2348.2	1043	100.81	3.7	864	11.23	2.4	35234	75.1	60361	26.5	9.1	79	12.05	8.94	270.39	547.2	287.03	115.45	106	7.45	0.65	4.8	Tian Jin	0.25	0.25
Tian Jin	2006	36.54	0.24	0.28	4.61	1.69	14283.1	6227.9	1049.3	263.2	9.9	7.9	4600	13.2	61	415	2130	1075	96.81	3.6	2590	14.23	2.35	40961	75.7	58887	25.5	8	66.21	13.36	9.53	308.16	514.2	292.63	96.02	114	8.53	0.64	4.1	Tian Jin	0.24	0.28
Tian Jin	2007	35.83	0.22	0.31	4.66	1.6	16357.4	7010.1	1164	306.2	9.7	8.7	4600	13.6	60.8	389.7	2165.4	1115	100.32	3.6	2912	12.72	2.34	45829	76.3	56928	24.5	7.4	69.99	10.76	9.84	351.32	622.85	323.39	122.7	94	8.62	1.11	3.85	Tian Jin	0.22	0.31
Tian Jin	2008	33.98	0.19	0.23	4.78	1.7	19422.5	7910.8	1220.9	301.1	9.1	7.9	4600	13.3	56	552.1	2415.4	1176	97.21	3.6	2858	14.33	2.66	55473	77.2	61229	24	7	59.28	10.43	11.23	406.29	817.43	351.18	133.23	88	8.52	1.32	3.52	Tian Jin	0.19	0.23
Tian Jin	2009	26.91	0.22	0.25	4.78	1.87	21402	8687.6	1273.4	299.8	8.6	7	4432	12.9	58	566.2	2356.5	1228	102.38	3.6	2716	15.38	2.8	62403	78	59647	23.7	7.2	62.87	12.6	11.6	459	840.68	394.65	139.01	101	9.62	1.23	3.07	Tian Jin	0.22	0.25
Tian Jin	2010	25.54	0.26	0.3	4.69	3.38	24292.6	10074.9	1275.6	360.5	7.7	7.3	4432	12.2	59	355.4	2089.2	1299	114.52	3.6	2752	12.05	2.92	62574	79.6	68196	23.5	6.5	65.41	13.17	11.32	521.49	865.7	443.79	158.77	96	9.27	1.31	2.75	Tian Jin	0.26	0.3
Tian Jin	2011	26.69	0.29	0.38	5.23	3.64	26920.9	12321.2	1415.4	571.7	7.7	8.5	4329	12.9	54	485.8	2245.2	1355	98.83	3.6	2636	15.19	2.98	77842	80.5	67147	23.09	7.59	83.45	14.96	11.04	555.79	1037.96	492.85	195.87	93	9.77	1.89	2.43	Tian Jin	0.29	0.38
Tian Jin	2012	24.41	0.15	0.21	5.72	3.77	29626.4	14025.5	1556.4	760.4	7.8	9.1	4358	12.5	57	755.3	2174.4	1413	98.61	3.6	2782	17.34	2.17	93110	81.6	82813	22.45	8.41	76.63	14.87	12.84	614.19	1128.65	564.76	192.1	105	10.17	1.84	2.24	Tian Jin	0.15	0.21
Tian Jin	2013	22.28	0.15	0.24	6.16	3.82	32293.6	15841	1694.3	732.6	7.8	7.2	4346	12.8	59	411.5	2255.2	1472	98.87	3.6	2843	18.99	3.18	99607	82	84210	21.68	8.75	87.02	16.88	13.5933	672.59	1219.34	636.67	188.33	150	10.88	2.36	2.06	Tian Jin	0.15	0.24
Tian Jin	2014	21.27	0.08	0.13	6.42	4.01	31506	17014.2	1721.3	979.7	7.1	7.1	4185	14	59	441.4	2265.6	1517	100.34	3.5	3328	18.14	2.2	105202	82.3	89361	20.92	13.95	97.41	18.89	14.3467	730.99	1310.03	708.58	184.56	133	11.59	2.88	2.35	Tian Jin	0.08	0.13
Tian Jin	2015	19.52	0.12		6.63	4.01	34101.3	18481.6	2172.2	1334.5	7.2	7.9	4058	13.7	59	574.2	2221.1	1547	120.43	3.5	3492	16.3	2.3	107960	82.6	93008	18.59	10.07	107.8	20.9	15.1	789.39	1400.72	780.49	180.79	117	12.3	3.4	2.09	Tian Jin	0.12	0.14
Tian Jin	2016	21.14	0.1		6.31	6.15	37109.6	20075.6	2172.2	1334.5	7.7	8.4	4058	13.8	58	608.6	2327.4	1562	114.39	3.5	3639	18.09	2.42	115053	82.9	91534	7.06	7.81	147.2	21.6	15.5	847.79	1491.41	852.4	177.02	103	12.6	4.3	2.26	Tian Jin	0.1	0.12
Tian Jin	2017	20.91	0.14		6.39	5.97	40277.5	21753.7	2599.5	1407.2	8.6	8.6	4072	14.2	55	512.9	2452.8	1557	111.1	3.5	3276	19.64	2.64	119238	82.9	90790	5.56	6.52	99	22	16.7	906.19	1582.1	924.31	173.25	94	12.6	4.1	1.92	Tian Jin	0.14	0.11
Tian Jin	2018	21.39	0.14		6.2	6.12	42976.3	23065.2	2825.1	1974.9	8.7	11.7	4150	13.8	56	626.5	2435	1560	115.72	3.5	5016	11.93	2.76	120711	83.2	90046	4.06	5.23	108.7	25.8	15.3	964.59	1672.79	996.22	169.48	82	13.9	4.7	1.39	Tian Jin	0.14	0.13
Ning Xia	2002	33.76	0.32	0.66	4.7	1.12	6067.4	1917.4	453	123.3	8.9	8.7	512	10	53	319	2655	572	104.82	4.4	294	3.8	0.47	5800	40.2	23287	22.2	12.2	74.59	11.01	2.69	190.8	307.92	41.16	34.92	142	0.77	2.74	43.82	Ning Xia	0.32	0.66
Ning Xia	2003	53.1	0.31	0.45	4.31	1.31	6530.5	2043.3	450.7	116.3	8.5	7.1	606	9.7	52	201.6	2569	580	103.29	4.4	281	4.12	1.84	6685	40.9	23538	29.3	12.6	84.38	11.33	2.74	203.69	332.8	43.06	40.12	132	0.51	2.81	54.86	Ning Xia	0.31	0.45
Ning Xia	2004	65.79	0.51	0.49	2.09	0.6	7217.9	2320.1	440.8	186.9	7.6	9.7	1163	10.3	49	144	2751.6	588	102.24	4.5	186	3.99	1.82	7880	41.6	23773	29.3	9.5	79.82	11.84	2.05	220.91	358.73	46.34	41.95	122	0.33	2.37	44.03	Ning Xia	0.51	0.49
Ning Xia	2005	65.57	0.61	0.49	4.5	1.27	8093.6	2508.9	535.9	198.8	8.4	9.5	1278	10.1	48	74.9	2813.4	596	101.47	4.5	189	4.76	1.78	10087	42.3	35817	34.3	12.4	82.68	13.25	2.17	198.03	361.94	53.22	42.66	90	0.45	2.5	44.84	Ning Xia	0.61	0.49
Ning Xia	2006	76.86	0.65	0.6	4.71	1.17	9177.3	2760.1	578.8	187.6	8	8.3	1511	10.9	51	195.8	2665.8	604	103.84	4.3	6145	7.72	1.82	11784	43	31796	38.3	11.4	76.55	13.41	3.02	230.35	370.83	53.98	40.09	97	0.58	2.78	45.65	Ning Xia	0.65	0.6
Ning Xia	2007	69.65	0.56	0.53	4.75	1.2	10859.3	3180.8	646	239.4	8.3	9.5	1511	10.4	52.3	214.7	2529.8	610	103.08	4.3	840	8.13	1.83	13743	44	37213	37	12.3	76.5	12.36	2.31	257.64	454.31	58.17	52.88	92	0.67	3.48	36.77	Ning Xia	0.56	0.53
Ning Xia	2008	59.52	0.39	0.38	5	1.42	12931.5	3681.4	816.9	318.8	8.5	10.3	1518	9.9	49	194.6	2824.2	618	103.71	4.4	883	9.36	1.83	17892	45	37948	34.8	11.6	74.77	12.1	3.17	294.19	590.53	62.1	54.25	84	0.7	4.52	37.77	Ning Xia	0.39	0.38
Ning Xia	2009	57.04	0.52	0.51	5.11	1.69	14024.7	4048.3	921.9	356.4	9	10.6	1721	10.5	48	180	2830.6	625	104.24	4.4	902	10.06	1.91	21475	46.1	41336	31.4	9.7	75.86	14.1	2.54	332.98	573.86	59.19	53.02	90	0.77	4.45	39.6	Ning Xia	0.52	0.51
Ning Xia	2010	57.39	0.47	0.49	5.58	2.06	15344.5	4674.9	890.1	417.9	7.9	10.4	1721	10.3	51	206.3	2759.3	633	105.09	4.4	1093	10.63	1.91	21777	47.9	40653	31.1	17.2	73.67	13.48	2.42	370.71	626.04	70.21	56.92	93	0.74	4.51	34.57	Ning Xia	0.47	0.49
Ning Xia	2011	48.23	0.5	0.56	5.92	2.44	17578.9	5410	978.1	444.7	7.6	9.4	1912	9.9	53	166.2	2558	639	111.07	4.4	1147	11.24	1.88	28971.5	49.8	39432	41.04	21.55	77.64	12.73	2.89	402.09	782.52	80.01	65.62	95	0.61	5.49	29.54	Ning Xia	0.5	0.56
Ning Xia	2012	45.99	0.54	0.61	6.79	2.39	19831.4	6180.3	1063.1	492.1	7.6	9.2	2107	9.8	48	292.7	2728.3	647	104.52	4.2	1251	12.46	2.01	36166	50.7	38948	40.66	19.83	69.95	11.64	3.4	422.66	834.58	81.17	65.78	99	0.74	5.98	34.81	Ning Xia	0.54	0.61
Ning Xia	2013	44.59	0.53	0.6	7.66	2.54	21833.3	6931	1158.8	702	7.6	10.8	2195	11.2	43	148.8	2693.5	654	104.32	4.1	1253	13.19	2.14	39420	52	38528	38.97	23.06	71.7667	12.76	3.86667	443.23	886.64	82.33	65.94	118	0.893333	5.92	41.18	Ning Xia	0.53	0.6
Ning Xia	2014	50.84	0.42	0.47	7.91	2.64	23284.6	8410	1616.9	856.9	9.4	11.2	2244	10.7	50	169.2	2738.8	662	105.8	4	1295	13.17	2.27	41834	53.6	37277	37.71	23.92	73.5833	13.88	4.33333	463.8	938.7	83.49	66.1	112	1.04667	5.86	8.65	Ning Xia	0.42	0.47
Ning Xia	2015	42.23	0.45		7.7	2.96	25186	9118.7	1874	1040.6	10.6	11	2225	10.7	50	227.1	2841.9	668	106.16	4	1336	13.97	2.4	43805	55.2	32025	35.76	22.99	75.4	15	4.8	484.37	990.76	84.65	66.26	112	1.2	5.8	9.17	Ning Xia	0.45	0.34
Ning Xia	2016	185.66	0.4		7.88	3.33	27153	9851.6	1874	1040.6	9.2	11.4	2225	10.7	50	264.9	2845.7	675	106.7	3.9	1343	13.47	2.53	46918.5	56.3	33949	23.69	20.12	76.7	15.2	4	504.94	1042.82	85.81	66.42	111	1.2	5.7	6.82	Ning Xia	0.4	0.21
Ning Xia	2017	43	0.53		8.1	3.96	29472.3	10737.9	1936.6	1131.2	9.6	11.3	2278	11	47	211.3	2894.5	682	96.91	3.9	1388	15.26	2.67	50917	58	30735	20.75	18.77	76.9	14.1	4.1	525.51	1094.88	86.97	66.58	106	1.3	5.9	7.19	Ning Xia	0.53	0.0799999
Ning Xia	2018	36.73	0.59		8.12	4.14	31895.2	11707.6	2152	1248.6	9.8	11.6	2379	10.6	46	280.2	2795.8	688	98.27	3.9	1371	13.35	2.82	54094	58.9	27521	17.81	17.42	81.6	15	4.6	546.08	1146.94	88.13	66.74	87	1.4	7.7	9.24	Ning Xia	0.59	0.07
An Hui	2002	33.66	0.91	2.85	3.02	1.17	6032.4	2117.6	298	73	6.3	4.9	521	17.2	75	1090	1584	6338	105.9	4	1471	6.1	2.16	5817	30.7	142748	39.6	24.3	82.01	9.37	4.74	183.12	418.44	105.84	79.44	90	4.63	3.86	17.88	An Hui	0.91	2.85
An Hui	2003	40.36	0.89	2.49	3.05	1.17	6778	2127.5	318.2	87.1	6.3	5.5	640	16.3	77	1413.4	1693	6410	106.03	4.1	1524	6.2	0.97	6889	32.3	141260	45.5	26	80.97	9.07	5.04	218.83	468.93	112.94	84.59	100	5.43	4.27	13.67	An Hui	0.89	2.49
An Hui	2004	53.41	0.72	1.42	0.99	0.79	7511.4	2499.3	395.7	92	6.9	5.1	985	16.6	72	908.3	2027.7	6461	105.39	4.2	1375	7.41	1	7768	33.9	148316	48.9	25.6	81.46	8.37	4.62	228.04	509.28	114.65	93.79	110	4.89	3.73	15.08	An Hui	0.72	1.42
An Hui	2005	91.76	0.4	1.12	3.22	1.18	8470.7	2641	400.3	133.7	6.3	6.1	1110	16.2	71	1091.3	1834.1	6120	100.79	4.4	1449	7.2	1.08	8810	35.5	156591	57.1	29.8	78.7	10.7	4.69	274.31	572.04	132.38	99.61	95	5.18	4.64	19.24	An Hui	0.4	1.12
An Hui	2006	85.63	0.38	1.18	3.28	1.26	9771.1	2969.1	441.4	165	6.1	6.8	1351	17	72	992.8	1857.8	6110	103.67	4.3	2030	7.7	1.14	10044	37.1	166471	58.4	31.1	76.28	10.71	5.01	295.57	548.93	143.16	96.21	99	5.23	4.03	16.3	An Hui	0.38	1.18
An Hui	2007	88.64	0.65	1.69	3.28	1.34	11473.6	3556.3	554.4	177	6.5	6.4	1351	17.3	78.3	929.7	1814.6	6118	102.45	4.1	2114	8.67	1.13	12015	38.7	175328	57.2	28.9	76.4	9.16	4.94	325.87	617.68	157.09	105.52	116	5.8	4.59	16.83	An Hui	0.65	1.69
An Hui	2008	88.5	0.45	1.16	3.71	1.51	12990.4	4202.5	633.9	199.4	6.7	6.1	1485	16.4	75	910.2	1801.2	6135	105.33	3.9	2043	9.18	1.1	14485	40.5	168670	55.6	29.1	109.63	8.74	5.96	402.41	782.11	184.06	125.32	134	5.67	5.37	14.49	An Hui	0.45	1.16
An Hui	2009	72.15	0.61	1.72	3.86	1.68	14085.7	4504.3	716.9	227.1	7	6.2	1742	16.7	73	951.9	1799.3	6131	106.62	3.9	2114	8.61	1.25	16391	42.1	179701	53.8	28	76.94	9.55	5.84	442.5	725.51	184.24	121.22	111	5.4	4.74	13.35	An Hui	0.61	1.72
An Hui	2010	64.49	0.48	1.39	3.98	1.95	15788.2	5285.2	737.1	264.4	6.4	6.6	1742	16.4	72	1316.8	1861	5957	103.39	3.7	2469	7.73	1.27	16408	43	184700	53.2	25.5	77.27	10.3	5.85	472.44	742.07	211.35	125.39	115	5.56	4.76	10.89	An Hui	0.48	1.39
An Hui	2011	62.71	0.4	1.32	5.04	2.17	18606.1	6232.2	907.6	440.5	6.9	8.9	2007	16.3	70	1000.5	1821.9	5968	102.7	3.7	2265	9.74	1.23	22600	44.8	243265	52.95	45.22	73.43	11.47	6.08	538.66	982.96	235.67	153.78	113	6.34	5.43	8.43	An Hui	0.4	1.32
An Hui	2012	64.79	0.31	1.05	5.03	2.44	21024.2	7160.5	1143	510.1	7.6	9.2	2101	16.5	73	936.4	1912.8	5988	108.78	3.7	2401	10.14	1.54	28792	46.5	254329	51.96	46.21	68.98	11.6	7.23	577.93	1035.59	268.2	148.34	98	6.2	6.05	8.27	An Hui	0.31	1.05
An Hui	2013	62.9			5.65	2.52	23114.2	8097.9	869.9	551.7	5.3	9.6	2203	17	76	893.2	1971.4	6030	104.11	3.4	2359	10.99	1.42	31684	47.9	266234	50.13	41.86	76.9533	14.7333	8.22	617.2	1088.22	300.73	142.9	115	7.26667	7.63333	7.43	An Hui	0.305	1.045
An Hui	2014	61.84	0.3	1.04	6.08	2.68	24838.5	9916.4	976.5	778.8	6.1	9.8	2309	16.5	76	1180.2	1539.4	6083	98.6	3.2	2416	11.6	1.71	34427	49.2	272313	49.3	65.28	84.9267	17.8667	9.21	656.47	1140.85	333.26	137.46	113	8.33333	9.21667	7.23	An Hui	0.3	1.04
An Hui	2015	58.44	0.24		6.38	2.81	26935.8	10820.7	1269.3	931.9	6.2	9	2259	16.7	76	1258.2	1533.5	6144	104.9	3.1	2458	11.39	1.8	35997	50.5	280626	48.01	54.59	92.9	21	10.2	695.74	1193.48	365.79	132.02	92	9.4	10.8	6.51	An Hui	0.24	1.035
An Hui	2016	56.77	0.22		6.4	2.98	29156	11720.5	1269.3	931.9	6.5	9.1	2259	17	76	1502	1653.6	6196	105.52	3.2	2487	11.95	1.82	39091.8	52	240666	28.16	32.13	94.7	20.5	11	735.01	1246.11	398.32	126.58	83	9.7	11.8	6.81	An Hui	0.22	1.03
An Hui	2017	55.78	0.21		6.61	3.31	31640.3	12758.2	1274.5	1006.8	6.1	9.1	2250	17.1	75	951.9	1675.8	6255	104.92	2.9	2535	13.61	1.93	44206	53.5	233838	23.54	28.08	96.3	21.3	11.2	774.28	1298.74	430.85	121.14	80	9.3	10.1	6.8	An Hui	0.21	1.025
An Hui	2018	51.08	0.23		7.27	3.46	34393.1	13996	1419.3	1036.7	6.6	8.1	2245	17	76	1495.6	1800.7	6324	106.06	2.8	2599	12.8	2.01	47712	54.7	227010	18.92	24.03	94	26.8	10.8	813.55	1351.37	463.38	115.7	72	10.9	11.6	6.75	An Hui	0.23	1.02
Shandong	2002	17.6	0.06	0.16	2.88	1.42	7614.4	2947.7	407.6	127.6	7.3	6.4	643	15	51	455.7	2305	9082	102.36	3.6	887	4.9	4.38	11643	41.7	230709	169	61.9	108	8.05	11.47	158.52	332.04	120.6	74.52	149	3.88	2.64	11.24	Shandong	0.06	0.16
Shandong	2003	25.8	0.04	0.1	2.82	1.42	8399.9	3150.5	444	138.8	7.3	6.5	834	13.8	58	985.2	2017	9125	100.42	3.6	901	4.92	1.45	13654	42.8	245782	183.6	62.4	118.19	8.09	11.61	179.91	347.85	120.79	75.71	149	4.01	2.7	13.67	Shandong	0.04	0.1
Shandong	2004	33.42	0.1	0.16	1.73	0.62	9437.8	3507.4	484.4	155.9	7.3	6.5	1361	14.8	56	1090	2179.7	9180	100.67	3.4	952	5.62	1.51	16925	43.9	264014	182.1	57.6	118.71	6.89	9.61	194.77	396.28	133.32	87.19	149	4.1	2.63	12.56	Shandong	0.1	0.16
Shandong	2005	46.72	0.3	0.39	3.24	1.55	10744.8	3930.5	579	188.5	7.8	6.9	1598	14.4	53	965.4	2369.5	9248	99.97	3.3	921	6.92	1.52	20030	45	280377	200.3	61.9	72.86	8.48	10.44	211.92	433.92	146.95	95.54	128	4.55	2.66	12.38	Shandong	0.3	0.39
Shandong	2006	42.24	0.28	0.42	3.41	1.55	12192.2	4368.3	624.1	221.8	7.4	7.1	1811	15.3	58	652.5	2088.4	9309	100.88	3.3	1860	10.5	1.57	23546	46.1	302637	196.2	58.4	77.48	8.99	10.81	239.25	422.44	174.14	89.87	114	4.42	2.49	9.13	Shandong	0.28	0.42
Shandong	2007	43.73	0.27	0.42	3.54	1.81	14264.7	4985.3	708.6	230.8	7.3	6.4	1811	15	61.3	797.1	1819.8	9367	100.87	3.2	1449	11.42	1.57	27723	46.8	334255	182.2	46.4	79.34	7.59	10.19	289.96	541.21	242.75	119.48	118	4.68	2.84	8.21	Shandong	0.27	0.42
Shandong	2008	45.22	0.16	0.26	4.01	2.06	16305.4	5641.4	799.8	280.5	7.3	6.9	1917	14.6	57	705.1	2004.2	9417	100.13	3.7	1413	12.19	1.7	33083	47.6	358911	169.2	44.4	78.98	7.4	11.42	318.65	657.95	263.11	123.4	126	4.9	3.15	7.96	Shandong	0.16	0.26
Shandong	2009	45.77	0.25	0.43	4.26	2.28	17811	6118.8	885.2	301.6	7.4	6.8	2153	14.8	54	701.8	2153.2	9470	102.3	3.4	1415	10.34	1.86	35796	48.3	386731	159	41.7	74.32	7.82	11.09	345.03	647.61	312.28	123.06	123	4.95	2.77	7.5	Shandong	0.25	0.43
Shandong	2010	42.48	0.18	0.33	4.83	3.21	19945.8	6990.3	885.8	383.9	6.8	8	2153	14.3	54	820.9	2014.3	9588	102.33	3.4	1389	10.18	1.94	35894	49.7	436372	153.8	39.1	70.93	8.62	10.9	401.49	682.72	321.62	132.17	117	4.66	2.74	7.06	Shandong	0.18	0.33
Shandong	2011	38.16	0.14	0.29	5.89	3.69	22791.8	8342.1	938.9	508.4	6.4	8.6	2191	14.1	54	667.1	2084	9637	100.74	3.4	1389	12.41	1.94	43831	51	443331	182.74	78.38	77.91	8.94	10.76	427.02	831.03	339.25	152.57	104	4.73	3.22	6.62	Shandong	0.14	0.29
Shandong	2012	38.3	0.14	0.3	6.47	4.31	25755.2	9446.5	1005.3	635.3	6.4	9.4	2238	14.3	55	569.1	2146	9685	102.14	3.3	1349	12.76	2.07	51768	52.4	479100	174.88	69.53	70.88	9.45	12.32	439.17	860.31	384.33	151.22	104	4.84	3.3	6.2	Shandong	0.14	0.3
Shandong	2013	37.14	0.35	1.19	7.07	4.27	28264.1	10619.9	1109.4	738.8	6.5	10	2304	14.7	57	736	2408	9733	103.87	3.2	1361	13.54	2.41	56323	53.8	494570	164.5	69.67	72.82	11.3333	12.9133	451.32	889.59	429.41	149.87	199	5.36	3.93333	5.31	Shandong	0.35	1.19
Shandong	2014	35.45	0.12	0.3	7.3	4.18	29221.9	11882.3	1188	776.4	6.5	9.8	2516	15.4	55	521.4	2168	9789	102.65	3.3	1426	13.17	2.36	60879	55	514423	159.02	120.81	74.76	13.2167	13.5067	463.47	918.87	474.49	148.52	172	5.88	4.56667	5.54	Shandong	0.12	0.3
Shandong	2015	33.06	0.12		7.71	4.21	31545.3	12930.4	1610	1027.3	7.1	10.5	2620	15	58	713.8	2260.2	9847	104.45	3.4	1452	14.43	2.4	64168	57	559908	152.57	108.25	76.7	15.1	14.1	475.62	948.15	519.57	147.17	163	6.4	5.2	6.65	Shandong	0.12	0.3
Shandong	2016	30.78	0.12		7.95	4.28	34012.1	13954.1	1610	1027.3	7.5	10.8	2620	15.4	57	1008.2	2213.7	9947	104.14	3.5	1502	15.88	2.46	67706.2	59	507591	113.45	87.38	80.5	16	15.5	487.77	977.43	564.65	145.82	146	6.8	5.6	6.56	Shandong	0.12	0.25
Shandong	2017	30.15	0.12		8.57	4.5	36789.4	15117.5	1780.6	1129.3	7.7	10.9	2519	15.7	54	615.5	2376.6	10006	101.68	3.4	1554	16.36	2.64	72851	60.6	499884	73.91	54.96	82.7	16.4	16.3	499.92	1006.71	609.73	144.47	128	6.5	5.1	6.07	Shandong	0.12	0.29
Shandong	2018	28.12	0.1		8.2	4.79	39549.4	16297	1966.3	1205	7.9	10.7	2588	15.4	55	880	2352.3	10047	100.77	3.4	1622	15.13	2.89	76267	61.2	492177	34.37	22.54	80.9	20.4	14.6	512.07	1035.99	654.81	143.12	111	7.2	5.5	7.04	Shandong	0.1	0.31
Shanxi	2002	23.48	0.1	0.2	4.7	2.05	6234.4	2149.8	364.8	64.4	7.7	4.8	1436	10.9	54	419.4	2333	3294	106.14	3.4	851	3.8	3.13	6098	39.4	90373	119.9	100.8	80.54	5.21	6.11	170.76	225.24	35.4	63.96	169	0.55	0.24	6.4	Shanxi	0.1	0.2
Shanxi	2003	30.55	0.13	0.23	4.84	1.87	7005	2299.2	367.5	81.2	7.2	5.7	824	10.1	62	525.4	2135	3314	105.01	3	860	4.12	2.02	7402	40.3	92506	136.3	109.7	80.87	5.36	6.15	191.68	251.76	36.37	66.27	172	0.47	0.24	5.79	Shanxi	0.13	0.23
Shanxi	2004	55.13	0.19	0.21	1.88	1.23	7902.9	2589.6	401.8	84.2	7.1	5.1	1427	10.9	56	377.2	2419.8	3335	105.44	3.1	1566	4.76	2.05	9150	41.2	93738	141.5	109.1	82.91	5.67	6.42	215.02	284.54	37.76	73.39	175	0.58	0.27	5.75	Shanxi	0.19	0.21
Shanxi	2005	87.53	0.28	0.29	4.87	2	8913.9	2890.7	538.7	102.9	8.5	5.5	1611	10.9	53	274.7	2620.9	3355	102.97	3	1588	5.25	1.99	12321	42.1	95096	151.6	112.2	80.72	5.54	5.74	247.57	280.62	36.77	75.18	139	0.67	0.41	5.57	Shanxi	0.28	0.29
Shanxi	2006	71.12	0.25	0.28	4.84	2.11	10027.7	3180.9	590	142.7	8.2	6.3	1790	11.8	58	424.8	2239.9	3375	102.27	3.2	2488	5.73	2.02	14106	43	102856	147.8	106.1	78.81	6.38	6.01	242.62	289.33	44.55	71.02	142	0.66	0.38	4.42	Shanxi	0.25	0.28
Shanxi	2007	70.93	0.25	0.29	4.72	1.92	11565	3665.7	640.2	170.9	7.9	6.4	1790	11.4	55.2	535.4	2174.6	3393	103.87	3.2	2914	6.62	1.91	16835	44	104594	138.7	93.4	74.08	5.56	5.95	288.15	355.88	46.92	94.46	124	0.81	0.57	4.26	Shanxi	0.25	0.29
Shanxi	2008	75.17	0.13	0.17	5.38	2.22	13119.1	4097.2	769.8	210.3	8.7	6.8	1863	10.9	53	355.3	2462.6	3411	102.93	3.3	2918	6.85	2.11	20398	45.1	106911	130.8	75.1	73.68	5.08	6.6	312.34	455.24	57.27	97.4	94	0.93	0.74	4.24	Shanxi	0.13	0.17
Shanxi	2009	71.06	0.31	0.43	5.68	2.53	13996.6	4244.1	789.9	240.9	8.4	7.3	2050	11.1	54	625.1	2448.6	3427	104.22	3.9	2931	7.09	2.45	21544	46	105875	126.8	64.7	70.56	5.71	6.05	332.98	418.96	57.71	94.3	106	0.8	0.69	4.08	Shanxi	0.31	0.43
Shanxi	2010	69.58	0.28	0.43	6.62	3.15	15647.7	4736.3	774.9	328.9	7.9	9	2050	11.3	52	376.6	2413.4	3574	105.56	3.6	2890	6.83	2.53	21522	48.1	118299	124.9	62.1	77.68	6.71	6.22	347.9	432.23	57.45	89.86	89	0.81	0.92	3.49	Shanxi	0.28	0.43
Shanxi	2011	64.82	0.22	0.38	7.57	3.3	18123.9	5601.4	851.3	349.3	7.5	7.6	2202	10.8	53	496.6	2372.8	3593	104.93	3.5	2977	7.87	2.42	27575	49.7	116132	139.91	112.99	84.89	6.96	7.78	352.14	511.25	63.43	106.52	84	0.98	1.27	2.9	Shanxi	0.22	0.38
Shanxi	2012	58.41	0.18	0.31	8.13	3.4	20411.7	6356.6	905.9	490.2	7.4	8.8	2351	10.7	51	427.8	2618.6	3611	104.46	3.3	3028	8.47	2.42	33628	51.3	134298	130.18	107.09	69.3	6.89	7.82	383.69	546.45	73.25	106.6	80	0.94	1.14	2.33	Shanxi	0.18	0.31
Shanxi	2013	52.62	0.16	0.3	8.49	3.49	22455.6	7153.5	1020.6	559	7.8	9.6	2474	11.2	56	487.3	2627.1	3630	105.52	3.1	3526	9.9	2.5	34813	52.6	138030	125.54	102.67	68.2667	8.09333	8.24667	415.24	581.65	83.07	106.68	157	0.96	1.22667	2.09	Shanxi	0.16	0.3
Shanxi	2014	46.33	0.21	0.39	8.76	3.59	24069.4	8809.4	1240.9	770.2	8.5	11	2504	10.9	58	428.7	2513.5	3648	103.3	3.4	3974	8.85	2.46	35064	53.8	145033	120.82	150.68	67.2333	9.29667	8.67333	446.79	616.85	92.89	106.76	138	0.98	1.31333	2.89	Shanxi	0.21	0.39
Shanxi	2015	42.32	0.21		9.19	3.68	25827.7	9453.9	1651.6	769.6	8.8	10.7	2439	11.3	58	403.6	2710.3	3664	107.49	3.5	3920	8.53	2.5	35017	55	145252	112.06	144.89	66.2	10.5	9.1	478.34	652.05	102.71	106.84	114	1	1.4	2.98	Shanxi	0.21	0.48
Shanxi	2016	38.65	0.2		9.44	3.79	27352.3	10082.5	1651.6	769.6	9.7	9.6	2439	11.2	59	528.4	2730.4	3682	106.04	3.5	3908	9.42	2.49	35197.7	56.2	139291	68.64	68.15	68.5	10.4	9.3	509.89	687.25	112.53	106.92	125	1.2	1.7	2.52	Shanxi	0.2	0.57
Shanxi	2017	37.22	0.23		9.64	4.02	29131.8	10787.5	1741.4	937.5	9.5	11.1	2401	11.5	57	521.2	2622	3702	108.34	3.4	3454	9.74	2.55	40557	57.3	135057	57.31	43.38	64.9	10.6	10.2	541.44	722.45	122.35	107	131	1.2	1.7	1.78	Shanxi	0.23	0.66
Shanxi	2018	35.03	0.21		10.26	4.18	31034.8	11750	2138.4	1065.2	10.8	11.6	2383	11.4	54	364.6	2562.9	3718	104.73	3.3	3514	10.57	2.68	45328	58.4	130823	45.98	18.61	73.1	12.4	10.1	572.99	757.65	132.17	107.08	135	1.3	1.7	2.47	Shanxi	0.21	0.75
Guangdong	2002	38.68	0.06	0.17	2.68	1.09	11137.2	3911.9	500.9	116.9	5.6	4.1	595	22.9	75	1865.7	1492	7859	105.62	3.1	1402	5.6	7.19	14908	53.8	489453	97.4	19.2	120.62	21.56	2.7	276.84	852.24	364.56	45.6	99	12.04	8.97	11.24	Guangdong	0.06	0.17
Guangdong	2003	41.3	0.05	0.12	2.78	1.12	12380.4	4054.6	616.8	137.4	6.4	4.7	738	22.9	72	1338.2	1742	7954	104.55	2.9	1779	5.1	1.37	16990	56.1	546430	107.5	22.9	130.22	22.27	2.83	287.91	846.22	359.79	44.85	99	13.3	10.4	13.67	Guangdong	0.05	0.12
Guangdong	2004	75.77	0.04	0.07	1.99	0.36	13627.7	4365.9	649.7	153.2	6.1	4.7	1285	22.8	68	1636.5	1767.4	8304	105.48	2.7	1659	6.53	1.36	19707	58.4	541717	114.8	26.1	131.02	21.81	2.63	312.31	972.99	382.58	49.69	99	13.43	10.17	12.56	Guangdong	0.04	0.07
Guangdong	2005	108.87	0.14	0.15	3.08	1.1	14770	4690.5	704.9	203.9	6	5.5	1462	22.8	71	1986.2	1288.5	9194	102.61	2.6	1363	6.45	1.28	23674	60.7	638403	129.4	27.9	122.02	20.91	2.76	348.64	1047.54	405.66	55.33	88	14.48	10.08	12.38	Guangdong	0.14	0.15
Guangdong	2006	95.22	0.13	0.15	3.21	1.13	16015.6	5079.8	707.9	197	5.7	5.1	1591	23.2	71	2175.7	1328.7	9442	105.06	2.6	2674	5.74	1.38	28077	63	654419	126.7	28.1	115.72	24.61	2.77	356.94	1013.76	414.2	51.95	76	13.83	10.67	9.13	Guangdong	0.13	0.15
Guangdong	2007	102.49	0.16	0.18	3.36	1.19	17699.3	5624	752.5	199.3	5.2	4.7	1591	23.2	70.8	1370.3	1616	9660	103.72	2.5	2686	7.9	1.43	32713	63.1	690887	120.3	29.4	110.42	21.74	2.72	411.77	1264.72	489.13	65.41	77	14.31	10.99	8.21	Guangdong	0.16	0.18
Guangdong	2008	105.4	0.13	0.15	3.54	1.25	19732.9	6399.8	836.4	259	5.4	5.3	1718	22.4	71	2284	1482.2	9893	105.09	2.6	2370	9.79	1.75	37589	63.4	677352	113.6	32.6	109.4	19.61	2.86	517.63	1548.64	549.8	76.12	71	13.7	11.93	7.96	Guangdong	0.13	0.15
Guangdong	2009	109.7	0.22	0.31	3.76	1.37	21574.7	6906.9	925.6	232	5.5	4.6	1952	23	70	1472.6	1671.8	10130	102.23	2.6	2402	10.43	1.93	40748	63.4	687429	107	30.1	111.53	22.07	2.8	525.11	1532.73	593.79	77.05	70	14.04	11.77	7.5	Guangdong	0.22	0.31
Guangdong	2010	99.51	0.13	0.21	5.38	1.89	23897.8	7890.3	929.5	307.4	5	5.6	1952	22.5	73	2353.6	1484	10441	109	2.5	2428	9.53	2.05	41166	66.2	722978	105.1	31.1	111.66	22.55	3.04	615.84	1640.6	657.73	83.75	69	14.55	11.73	7.06	Guangdong	0.13	0.21
Guangdong	2011	83.33	0.16	0.26	6.24	2.16	26897.5	9371.7	948.2	398.5	4.7	5.9	1978	21.4	74	1632.3	1878.4	10505	115.23	2.5	2637	12.9	2.16	47630.5	66.5	785587	84.77	32.43	105.46	26.15	3.28	642.09	1926.38	700.98	104.49	69	15.74	12.95	6.62	Guangdong	0.16	0.26
Guangdong	2012	78.07	0.19	0.29	6.89	2.3	30226.7	10542.8	1048.3	446.5	4.7	6	2082	21.7	82	1813.9	1471.2	10594	111.94	2.5	2927	13.42	1.88	54095	67.4	838551	79.92	32.83	99.53	26.35	3.39	742.25	2086.69	792.27	107.81	69	15.88	13.16	6.2	Guangdong	0.19	0.29
Guangdong	2013	73.16	0.15	0.24	7.71	2.28	33090	11669.3	1122.7	502	4.7	6	2199	21.5	81	2095.4	1582.9	10644	110.84	2.4	3066	13.08	2.4	58540	67.8	862471	76.19	35.4	100.253	29.5667	4.32667	842.41	2247	883.56	111.13	72	16.82	15.44	5.31	Guangdong	0.15	0.24
Guangdong	2014	76.57	0.16	0.25	7.49	2.57	32148.1	12245.6	988.3	686	4.2	6.8	2434	21.7	79	2234	1613.6	10724	118.62	2.4	2999	13.28	2.02	63452	68	905082	73.01	44.95	100.977	32.7833	5.26333	942.57	2407.31	974.85	114.45	67	17.76	17.72	5.8	Guangdong	0.16	0.25
Guangdong	2015	74.12	0.15		7.62	2.61	34757.2	13360.4	1304.5	803.9	4.3	6.5	2431	22.3	78	2471.9	1594.3	10849	113.51	2.5	3060	13.52	2.1	67503	68.7	911523	67.83	34.78	101.7	36	6.2	1042.73	2567.62	1066.14	117.77	59	18.7	20	2.9	Guangdong	0.15	0.26
Guangdong	2016	71.82	0.22		7.67	2.85	37684.3	14512.2	1304.5	803.9	4.6	6.5	2431	21.9	82	2939.7	1451.8	10999	113.02	2.5	3193	14.2	2.21	72786.6	69.2	938261	35.37	28.17	100.4	35.8	6.4	1142.89	2727.93	1157.43	121.09	56	18.8	22	2.87	Guangdong	0.22	0.27
Guangdong	2017	74.66	0.16		7.48	3.1	40975.1	15779.7	1503.6	921.7	5	7	2454	22.1	80	2067.4	1671.5	11169	113.46	2.5	3253	15.3	2.31	81089	69.9	882020	27.68	26.08	100.7	36.3	6.8	1243.05	2888.24	1248.72	124.41	56	19.2	23.5	2.51	Guangdong	0.16	0.28
Guangdong	2018	64.81	0.17		7.38	3.35	44341	17167.7	1591.3	1366.7	5.1	8.9	2542	22.1	82	1759	1537.6	11346	117.27	2.4	3469	12.74	2.44	86412	70.7	825779	19.99	23.99	105	41.6	7	1343.21	3048.55	1340.01	127.73	54	19.8	23.9	2.67	Guangdong	0.17	0.29
Guangxi	2002	68.35	0.04	0.08	3.06	1.13	7315.3	2012.6	241.7	66.2	4.5	3.9	386	21.7	82	1317.9	1275	4822	108.39	3.7	453	3.8	3.5	5062	30.6	184657	68.3	45.7	117.61	14.33	1.12	196.8	689.4	186.6	38.88	66	3.55	7.02	9.14	Guangxi	0.04	0.08
Guangxi	2003	92.33	0.04	0.05	2.9	1.11	7785	2094.5	322.7	74.8	5.6	4.3	468	22	79	1296.7	1833	4857	109.84	3.6	583	4.39	1.03	5964	31.6	214814	87.4	23	108.94	14.44	1.12	216.11	715.98	191.51	41.78	72	3.57	7.33	9.21	Guangxi	0.04	0.05
Guangxi	2004	119.87	0.06	0.07	0.97	0.78	8690	2305.2	461.7	83.6	7.2	4.3	909	21.5	78	906.3	1616.6	4889	107.55	4.1	706	6.31	1.09	7196	32.6	218776	94.4	54.7	106.31	12.72	1.09	238.1	828.76	177.66	50.97	78	3.52	7.24	8.08	Guangxi	0.06	0.07
Guangxi	2005	136.38	0.14	0.15	2.89	1.18	9286.7	2494.7	466	123.4	6.6	5.3	993	21.4	83	1119.2	1423.2	4660	107.62	4.2	711	6.93	1.17	8746	33.6	270857	102.3	55	101.68	15.44	1.05	266.69	876.53	178.47	50.93	67	4.21	9.19	9.79	Guangxi	0.14	0.15
Guangxi	2006	127.23	0.23	0.27	2.96	1.19	9898.8	2770.5	401.1	123.9	5.9	5.1	1228	22	76	1159.4	1478.8	4719	109.18	4.2	1618	7.41	1.2	10240	34.6	259721	99.4	45.7	104.76	15.22	1.09	280.82	870.56	237.11	46.68	66	3.87	8.91	8.64	Guangxi	0.23	0.27
Guangxi	2007	129.84	0.24	0.29	3.05	1.34	12200.4	3224.1	542.1	149	6.7	5.4	1228	21.7	75.5	1008.1	1614	4768	108.61	3.8	1464	8.13	1.22	12408	36.2	319808	97.4	35.5	102.84	13.14	1.29	300.01	1040.34	225.11	60.94	64	4.18	9.53	7.91	Guangxi	0.24	0.29
Guangxi	2008	131.41	0.15	0.17	3.27	1.51	14146	3690.3	529.4	154.3	5.5	5.2	1273	20.8	77	1625	1439	4816	109.21	3.8	1461	8.43	1.18	14966	38.2	345355	92.5	30.4	100.36	11.36	1.32	358.99	1312.22	263.79	65.22	56	3.92	9.8	7.36	Guangxi	0.15	0.17
Guangxi	2009	102.47	0.21	0.32	3.54	1.69	15451.5	3980.4	538.2	205.2	5.2	6.3	1436	22.2	75	963.1	1753.8	4856	110.76	3.7	1391	9.94	1.28	15923	39.2	305507	89	26	99.84	13.57	1.3	364.98	1241.99	275.81	62.1	50	3.57	10.02	6.59	Guangxi	0.21	0.32
Guangxi	2010	97.01	0.15	0.26	3.83	2.05	17063.9	4543.4	625.5	229	5.4	6.6	1436	21.8	77	1376.9	1601.5	4610	108.26	3.7	1498	8.07	1.33	16045	40	312630	90.4	26.1	96.76	14.25	1.29	428.87	1280.94	293.42	69.24	69	3.71	9.84	6.145	Guangxi	0.15	0.26
Guangxi	2011	98.91	0.19	0.37	4.41	2.29	18854.1	5231.3	779.1	301.3	6.1	7.2	1688	20.7	75	1252.9	1663.3	4645	109.97	3.5	1569	8.9	1.38	21994	41.8	222439	52.1	28.83	87.74	16.61	1.79	448.41	1554.17	324.82	81.07	73	3.87	10.61	5.7	Guangxi	0.19	0.37
Guangxi	2012	101.25	0.1	0.2	4.74	2.58	21242.8	6007.5	883.6	383.9	6.2	7.8	1834	21.4	80	1086.8	1295.7	4682	107.72	3.4	1528	9.18	1.67	27943	43.5	245578	50.41	29.97	86.43	16.21	2.22	521.24	1617.61	378.22	83.19	69	3.83	10.71	5.36	Guangxi	0.1	0.2
Guangxi	2013	96.98	0.13	0.27	5.06	2.89	23305.4	6790.9	776.3	413.4	5	7.9	1939	21.6	80	1569.3	1619.8	4719	109.44	3.3	1543	9.42	1.54	30588	44.8	225303	47.2	28.95	86.7533	20.04	3.21333	594.07	1681.05	431.62	85.31	90	4.88667	13.0067	4.88	Guangxi	0.13	0.27
Guangxi	2014	100.65	0.12	0.26	5.3	3.11	24669	8683.2	845.9	553.5	5.6	8.3	2178	21.6	82	1234.7	1416.4	4754	108.36	3.2	1684	9.19	1.82	33090	46	219304	46.66	40.29	87.0767	23.87	4.20667	666.9	1744.49	485.02	87.43	84	5.94333	15.3033	3.31	Guangxi	0.12	0.26
Guangxi	2015	96.41	0.1		5.85	3.16	26415.9	9466.6	1065.9	781.8	5.3	9.4	2279	22.2	83	1222.3	1431.1	4796	105.57	2.9	1823	9.1	1.9	35190	47.1	220066	42.12	35.59	87.4	27.7	5.2	739.73	1807.93	538.42	89.55	72	7	17.6	4.66	Guangxi	0.1	0.25
Guangxi	2016	84.18	0.14		5.86	3.29	28324.4	10359.5	1065.9	781.8	6.2	9.4	2279	22.3	80	1546.4	1582.9	4838	108.43	2.9	1891	9.77	2	37876.4	48.1	193186	20.11	26.19	80	27.4	4.5	812.56	1871.37	591.82	91.67	62	7.6	18.4	3.79	Guangxi	0.14	0.24
Guangxi	2017	87.86	0.1		6.35	3.41	30502.1	11325.5	1254.2	931	6.8	9.9	2383	21.9	80	1548.7	1632.2	4885	109.2	2.2	1950	10.74	2.07	41955	49.2	198144	17.73	20.91	78.1	28.4	4.9	885.39	1934.81	645.22	93.79	56	7.7	19.2	3.3	Guangxi	0.1	0.23
Guangxi	2018	82.82	0.08		6.38	3.66	32436.1	12434.8	1699.3	1088	8.4	10.2	2602	21.8	79	1274.2	1653.4	4926	108.47	2.3	2025	10.78	2.15	41489	50.2	203102	15.35	15.63	78.8	33.6	4.6	958.22	1998.25	698.62	95.91	57	7.3	17.5	3.18	Guangxi	0.08	0.22
Xinjiang	2002	77.46	0.04	0.08	5.47	2.27	6899.6	1863.3	341	99.8	6	7.1	694	8	56	342.2	2577	1905	102.25	3.7	187	11.4	1.58	8365	35.1	47756	29.6	19.1	88.47	11.04	1.1	166.2	420.6	54.36	44.28	140	0.35	1.36	15.56	Xinjiang	0.04	0.08
Xinjiang	2003	77.32	0.07	0.13	5.93	2.31	7173.5	2106.2	357.6	116.5	6.5	8	695	6.7	55	369.4	2550	1934	103.77	3.5	211	12.75	2.09	9686	35.8	55905	33.1	20.6	75.12	11.88	1.27	182.13	412.76	54.72	43.54	127	0.4	1.51	11.91	Xinjiang	0.07	0.13
Xinjiang	2004	142.02	0.07	0.08	2.4	1.44	7503.4	2244.9	375.2	142	6.5	8.4	1307	8	56	333.6	2495.6	1963	103.56	3.8	213	13.11	2.19	11199	36.5	60040	48	26	68.33	11.7	1.02	197.59	411.29	54.98	44.69	114	0.33	1.55	10.56	Xinjiang	0.07	0.08
Xinjiang	2005	205.63	0.45	0.34	6.25	2.35	7990.2	2482.2	499.2	169.3	8	8.8	1329	7.5	56	276.3	2528.7	2010	102.76	3.9	230	13	2.06	13184	37.2	63419	51.9	27	67.89	12.22	1	205.68	446.99	58.31	48.55	114	0.41	1.7	10.33	Xinjiang	0.45	0.34
Xinjiang	2006	192.6	0.27	0.27	6.39	2.47	8871.3	2737.3	472.4	189.7	7	9.3	1416	8.6	54	235.9	2841.8	2050	102.41	3.9	5403	13.41	2.09	14871	37.9	65442	54.9	28.1	63.78	13.54	1.21	230.53	436.73	61.04	43.5	152	0.42	1.39	9.35	Xinjiang	0.27	0.27
Xinjiang	2007	199.99	0.3	0.32	6.65	2.66	10313.4	3183	598.8	210.7	7.6	9	1416	8.5	56	419.5	2853.4	2095	103.47	3.9	4836	15.6	2.08	16860	39.2	68618	58	29.2	70.77	12.47	1.09	243.77	569.42	63.72	51.73	136	0.48	1.62	8.89	Xinjiang	0.3	0.32
Xinjiang	2008	202.93	0.25	0.28	6.82	2.9	11432.1	3502.9	643.5	244.6	7.4	9.1	1414	8.7	52	171.8	3093.3	2131	103.14	3.7	4987	13.23	2.09	19893	39.6	74700	58.5	30.6	69.34	10.82	1.37	305.59	703.71	72.77	59.63	145	0.46	1.9	8.19	Xinjiang	0.25	0.28
Xinjiang	2009	186.35	0.22	0.23	7.2	3.24	12257.5	3883.1	684	316.6	7.3	10.7	1430	8	56	353.1	2835	2159	102.61	3.8	4922	12.22	2.2	19926	39.9	77184	59	31.7	71.54	11.92	1.49	313.42	748.09	80.47	58.9	140	0.42	2.19	7.2	Xinjiang	0.22	0.23
Xinjiang	2010	164.46	0.15	0.18	10.89	4.28	13643.8	4642.7	708.2	314.7	6.9	9.1	1430	7.4	56	282.4	2815.7	2185	105.34	3.2	4977	11.66	2.27	19942	43	83690	58.8	34.4	77.52	12.54	1.92	363.33	815.84	87.82	68.38	133	0.44	2.27	6.195	Xinjiang	0.15	0.18
Xinjiang	2011	157.83	0.13	0.17	8.94	5.02	15513.6	5442.2	913	376.9	7.7	8.6	1521	7.3	56	344.5	2767.5	2209	105.31	3.2	4563	13.46	2.25	26781.5	43.5	83329	76.31	53.19	77.93	14.57	2.96	427.51	1048.21	100.17	85.84	132	0.64	2.85	5.19	Xinjiang	0.13	0.17
Xinjiang	2012	181.17	0.13	0.17	12.48	4.96	17920.7	6393.7	1027.6	444.2	7.4	8.4	1596	7.4	53	286.9	2864.6	2233	103.97	3.4	4312	13.91	2.26	33621	44	93810	79.61	69.61	77.14	17.41	3.62	499.33	1205.88	115.34	91.01	145	0.59	3	4.62	Xinjiang	0.13	0.17
Xinjiang	2013	172.73	0.11	0.15	9.92	5.5	19873.8	7296.5	1179.8	593.4	7.8	9.7	1681	8.7	58	300.9	3068.6	2264	105.25	3.4	4361	14.35	2.34	37181	44.5	100720	82.94	75.59	81.4267	18.5067	4.21333	571.15	1363.55	130.51	96.18	146	0.693333	3.13333	4.29	Xinjiang	0.11	0.15
Xinjiang	2014	176	0.09	0.12	12.42	5.67	23214	8723.8	1310.9	717.2	7.4	9.7	1759	7.4	54	297	2986.9	2298	104.5	3.2	4280	15.54	2.38	40607	46.1	102748	85.3	81.39	85.7133	19.6033	4.80667	642.97	1521.22	145.68	101.35	146	0.796667	3.26667	13.12	Xinjiang	0.09	0.12
Xinjiang	2015	184.53	0.11		12.85	5.94	26274.7	9425.1	1934.8	846.8	7.8	9.5	1780	8.8	58	408.9	2798.8	2360	104.12	2.9	2557	16.08	2.4	40036	47.2	99952	77.83	59.59	90	20.7	5.4	714.79	1678.89	160.85	106.52	133	0.9	3.4	4.46	Xinjiang	0.11	0.09
Xinjiang	2016	185.66	0.18		11.27	6.18	28463.4	10183.2	1934.8	846.8	9.1	10.2	1780	8.4	60	387.1	2719.8	2398	104.48	2.5	2456	15.24	2.51	40427.1	48.4	93907	48.07	45.67	90.5	20.6	5	786.61	1836.56	176.02	111.69	115	1	4.1	3.79	Xinjiang	0.18	0.06
Xinjiang	2017	202.59	0.16		11.4	6.66	30774.8	11045.3	2065.6	970.7	9.1	11.1	1863	8.3	59	309.7	2667.9	2445	102.12	2.6	2436	14.58	2.55	45099	49.4	101291	41.82	50.15	82.6	19.3	4.5	858.43	1994.23	191.19	116.86	105	1	4.5	3.19	Xinjiang	0.16	0.03
Xinjiang	2018	304.94	0.15		11.3	7.12	32763.5	11974.5	2272.6	1017.5	9.4	10.8	1954	7.4	55	325.4	2749.8	2487	99.76	2.4	2525	14.44	2.55	49475	50.9	108675	35.57	54.63	78.5	22.3	3.5	930.25	2151.9	206.36	122.03	98	0.7	3.4	3.68	Xinjiang	0.15	-3.72529e-08
Jiangsu	2002	36.6		0.01	2.96	1.2	8177.6	3979.8	376.1	142.5	6.2	5.4	949	16.6	72	1042.5	1928	7381	100.3	4.2	1315	6.9	3.81	14397	46.3	432016	112	38.6	108.16	12.31	6.18	224.04	496.08	240.72	66.36	119	8.54	4.16	14.31	Jiangsu	0.01	0.01
Jiangsu	2003	43.17		0.02	2.99	1.25	9262.5	4239.3	493.8	142.1	7.4	5.3	1161	16	72	1623.5	1719	7406	97.99	4.1	1332	7.22	1.4	16796	47.7	420070	124.1	38.8	109.12	12.05	6.72	245.06	516.47	234.46	63.82	120	9.09	4.5	14.46	Jiangsu	0.02	0.02
Jiangsu	2004	63.73	0.02	0.07	1.99	0.47	10481.9	4753.9	496.8	163.2	6.8	5.5	1768	16.9	70	975.1	2141.3	7433	98.53	3.8	1375	7.9	1.41	20705	49.1	466111	124	41.5	117.12	11.5	6.56	263.67	588.68	263.52	73.85	121	8.82	4.54	13.15	Jiangsu	0.02	0.07
Jiangsu	2005	77.24	0.12	0.25	3.11	1.38	12318.6	5276.3	579.3	198.6	6.7	5.6	2015	16.3	66	992.3	1937.5	7475	96.34	3.6	1321	9.07	1.45	24518	50.5	519425	137.3	45.2	108.87	14.07	6.38	291.55	622.04	266.16	74.84	110	9.97	5.65	10.02	Jiangsu	0.12	0.25
Jiangsu	2006	65.99	0.12	0.27	3.26	1.46	14084.3	5813.2	600.7	232.3	6.2	5.6	2301	16.9	71	1106.8	1766.9	7656	94.92	3.4	2364	8.61	1.5	28685	51.9	515549	130.4	43	113.26	14.07	6.91	320.25	600.64	285.58	72.77	109	10.47	5.51	9.36	Jiangsu	0.12	0.27
Jiangsu	2007	62.97	0.15	0.35	3.4	1.5	16378	6561	689.4	263.9	6.4	5.5	2301	17.3	70.3	1070.9	1680.3	7723	95.59	3.2	2050	11.55	1.54	33689	53.2	505598	121.8	36.9	114.45	12.16	6.32	381.11	758.4	325.69	85.5	107	11.38	6.09	8.19	Jiangsu	0.15	0.35
Jiangsu	2008	60.97	0.12	0.26	3.66	1.64	18679.5	7356.5	794.6	290.9	6.6	5.5	2542	16.1	72	975	1869.1	7762	95.07	3.3	1905	12.41	1.62	39622	54.3	509701	113	33.5	113.58	11.85	7.68	424.59	968.77	356.12	93.98	98	10.99	6.68	8.05	Jiangsu	0.12	0.26
Jiangsu	2009	58.12	0.16	0.35	3.81	1.8	20551.7	8003.5	808.4	323	6.1	5.6	2786	16.4	72	1363.5	1863.2	7810	97.3	3.2	2152	13.24	1.69	44232	55.6	522329	107.4	33	140.35	12.54	7.18	472.39	930.94	381.65	94.77	100	10.81	6.55	7.24	Jiangsu	0.16	0.35
Jiangsu	2010	59.93	0.13	0.3	4.66	2.62	22944.3	9118.2	805.7	362.3	5.6	5.5	2786	16.2	71	1298.4	1899.3	7869	101.54	3.2	2027	10.91	1.73	44744	60.6	555500	105	33.5	106.99	14.15	6.83	568.46	1027.57	421.94	106.86	114	11.16	6.21	6.05	Jiangsu	0.13	0.3
Jiangsu	2011	48.69	0.12	0.31	5.32	3.14	26340.7	10805	962.5	645.6	5.7	8	2824	16.1	68	1077	1944.3	7899	100.86	3.2	2013	13.21	1.79	56545.5	61.9	592774	105.38	52.74	94.93	14.7	6.38	582.89	1205.12	458.25	123.9	97	10.64	5.87	4.86	Jiangsu	0.12	0.31
Jiangsu	2012	47.36	0.1	0.26	6.54	3.31	29677	12202	1058.1	724.2	5.6	7.9	2786	16	68	917.2	1939.1	7920	98.9	3.1	2002	13.36	1.99	68347	63	598211	99.2	44.32	92.95	14.91	6.96	662.97	1315.82	542.92	128.98	102	10.32	5.7	4.78	Jiangsu	0.1	0.26
Jiangsu	2013	29.26	0.1	0.26	7.44	3.49	32537.5	13597.8	1122	809.9	5.5	8.2	2814	16.8	68	898.4	2196.9	7939	99.94	3	2016	14.15	2.23	74607	64.1	594359	94.17	50	93.1	17.5067	7.80667	743.05	1426.52	627.59	134.06	137	11.4467	6.5	3.78	Jiangsu	0.1	0.26
Jiangsu	2014	41.9	0.08	0.22	7.57	3.73	34346.3	14958.4	1616.7	845.3	6.9	7.2	2896	16.4	74	1091.1	1863.8	7960	101.66	3	2038	15.08	2.24	81874	65.2	601158	90.47	76.37	93.25	20.1033	8.65333	823.13	1537.22	712.26	139.14	124	12.5733	7.3	5.07	Jiangsu	0.08	0.22
Jiangsu	2015	39.52	0.1		8.48	3.7	37173.5	16256.7	1624.5	1148	6.4	8.4	2937	16.4	73	1765.6	1848.2	7976	103.01	3	2034	15.81	2.4	87995	66.5	621303	83.51	65.45	93.4	22.7	9.5	903.21	1647.92	796.93	144.22	97	13.7	8.1	5.4	Jiangsu	0.1	0.18
Jiangsu	2016	35.93	0.1		8.41	4.07	40151.6	17605.6	1624.5	1148	6.1	8	2937	16.8	73	1807.7	1856.1	7999	101.44	3	2057	16.57	2.56	95257.1	67.7	616624	57.01	47.17	92	22.3	9.2	983.29	1758.62	881.6	149.3	85	14	9.1	5.81	Jiangsu	0.1	0.14
Jiangsu	2017	33.52	0.11		8.63	4.31	43621.8	19158	1573.7	1395	5.7	8.9	3045	17	72	1255.1	2037.4	8029	103.02	3	2092	17.42	2.7	107189	68.8	575196	41.07	39.08	97.8	23.1	9.6	1063.37	1869.32	966.27	154.38	76	14.2	8.5	5.95	Jiangsu	0.11	0.1
Jiangsu	2018	31.02	0.1		8.25	4.8	47200	20845.1	2273.3	1529.6	7.7	9.2	3143	17	73	1267	2027.4	8051	103.43	3	2176	15.63	2.9	115168	69.6	533768	25.13	30.99	86.9	25	9.2	1143.45	1980.02	1050.94	159.46	75	13.5	8.5	5.77	Jiangsu	0.1	0.06
Jiangxi	2002	45.21	0.02	0.04	3.08	1.31	6335.6	2306.5	267.7	80.9	5.9	4.5	631	18.3	78	1761.7	1558	4222	106.07	3.4	1596	5.7	1.73	5827	31.9	105603	29.3	15.8	140.73	12.86	2.9	235.32	417.36	110.52	48	101	4.42	2.47	10.76	Jiangxi	0.02	0.04
Jiangxi	2003	53.15	0.03	0.07	2.78	1.3	6901.4	2457.5	264.9	92	5.4	4.8	843	18.5	73	1742.9	2197	4254	105.16	3.6	2582	6.79	1.13	6677	33.6	111958	43.7	19.7	144.22	13.24	3.5	262.94	444.81	110.71	48.14	100	5.19	3.31	8.25	Jiangxi	0.03	0.07
Jiangxi	2004	87.8	0.04	0.06	0.96	0.83	7559.6	2786.8	268.1	110.3	5	5.3	1412	18.8	70	1210.1	2149	4284	106.21	3.6	2647	7.32	1.17	8189	35.3	120092	51.9	21.9	135.52	12.9	3.12	271.88	510.89	128.97	55.88	99	4.58	2.84	9.06	Jiangxi	0.04	0.06
Jiangxi	2005	132.68	0.17	0.15	2.96	1.24	8619.7	3128.9	326.5	154.7	5.3	6.2	1768	18.2	70	1908.7	1794.5	4311	103.65	3.5	2740	8.03	1.15	9437	37	123320	61.3	24.6	136.4	15.61	3.5	271.67	557.31	140.48	56.72	89	5.43	3.75	10.54	Jiangxi	0.17	0.15
Jiangxi	2006	98.49	0.17	0.17	2.89	1.29	9551.1	3459.5	357	159.1	5.4	5.9	2105	18.6	71	1567.5	1800.3	4339	105.13	3.6	4547	8.06	1.19	10679	38.7	134518	63.4	23	130.96	15.23	3.27	320.19	530.69	140.65	54.76	86	5.6	3.59	9.21	Jiangxi	0.17	0.17
Jiangxi	2007	94.35	0.24	0.25	2.96	1.35	11451.7	4044.7	385.9	167.7	4.9	5.6	2105	19.2	67.7	1118.5	2102	4368	104.64	3.4	4407	9.37	1.19	12562	39.8	141266	62.1	20.2	137.71	13.49	3.34	388.13	733.28	176.92	72.54	83	6.14	4.08	7.2	Jiangxi	0.24	0.25
Jiangxi	2008	90.31	0.17	0.18	3.22	1.46	12866.4	4697.2	484	205.7	5.6	6.2	2111	18.5	69	1356.1	2118.2	4400	104.56	3.4	4680	10.23	1.2	14781	41.4	138909	58.3	18.4	142.39	12.05	3.47	489.66	898.5	212.7	77.53	83	5.78	4.16	6.49	Jiangxi	0.17	0.18
Jiangxi	2009	95.33	0.28	0.34	3.44	1.6	14021.5	5075	550.3	232.8	5.6	6.6	2118	18.8	70	1277.8	1970.5	4432	104.77	3.4	4757	9.22	1.28	17185	43.2	147080	56.4	16.4	136.21	13.33	3.53	486.46	872.34	236.96	79.25	79	5.56	4.03	4.96	Jiangxi	0.28	0.34
Jiangxi	2010	85.08	0.17	0.23	4.43	1.85	15481.1	5788.6	524.2	243.8	4.9	6.2	2118	18.5	73	2211.1	1783.9	4462	107.46	3.3	4786	7.61	1.32	17335	44.1	160661	55.7	16.4	132.54	12.71	3.28	581.89	916.4	254.69	89.11	87	5.23	4.14	4.33	Jiangxi	0.17	0.23
Jiangxi	2011	79.68	0.14	0.19	5.62	2.2	17494.9	6891.6	641.2	346.7	5.5	7.4	2212	18.4	66	1108.6	1901.6	4488	111.2	3	4527	9.78	1.32	23067	45.7	194432	58.41	39.6	115.47	13.7	4.56	580.69	1107.29	260.95	104.28	88	5.77	3.95	3.7	Jiangxi	0.14	0.19
Jiangxi	2012	76.24	0.14	0.19	6.8	2.6	19860.4	7829.4	670.7	380.4	5.2	7.4	2295	18	77	2059.8	1622	4504	107.64	3	4663	10.01	1.49	28799	47.5	201190	56.77	35.74	105.61	13.9	4.22	671.48	1161.74	291.38	104.09	88	5.44	3.66	3.74	Jiangxi	0.14	0.19
Jiangxi	2013	72.14	0.16	0.23	7.05	2.8	21872.7	8781.5	672.5	401.3	4.9	7.1	2381	19	73	1431.8	2034.1	4522	108.52	3.2	4542	9.15	1.46	31771	48.9	207138	55.77	35.63	105.007	15.9667	4.91333	762.27	1216.19	321.81	103.9	116	6.26	4.47333	2.75	Jiangxi	0.16	0.23
Jiangxi	2014	71.81	0.11	0.16	7.71	2.91	24309.2	10116.6	760.7	525.2	5	7	2654	18.8	74	1890.5	1810.5	4542	109.27	3.3	4671	8.56	1.64	34661	50.2	208289	53.44	46.23	104.403	18.0333	5.60667	853.06	1270.64	352.24	103.71	85	7.08	5.28667	3.38	Jiangxi	0.11	0.16
Jiangxi	2015	71.63	0.11		8.08	3.06	26500.1	11139.1	887.4	650	5	6.7	2698	18.7	75	2204.7	1651.4	4566	106.12	3.4	4822	8.69	1.7	36724	51.6	223232	52.81	48.06	103.8	20.1	6.3	943.85	1325.09	382.67	103.52	75	7.9	6.1	4.68	Jiangxi	0.11	0.09
Jiangxi	2016	71.99	0.1		8.51	3.18	28673.3	12137.7	887.4	650	5	7.1	2698	19	75	1869	1799.3	4592	108.45	3.4	4613	8.86	1.72	40106.2	53.1	221092	27.69	33.31	110.1	19.9	5.7	1034.64	1379.54	413.1	103.33	78	8.3	6.7	4.83	Jiangxi	0.1	0.02
Jiangxi	2017	72.02	0.09		9.52	3.49	31198.1	13241.8	1044.3	718.2	5.4	7.3	2676	19.2	73	1698.8	1853.5	4622	108.28	3.3	4740	12.55	1.81	45187	54.6	189362	21.55	27.95	104.3	21.1	5.8	1125.43	1433.99	443.53	103.14	76	8.4	6.7	4.36	Jiangxi	0.09	-0.05
Jiangxi	2018	70.83	0.1		7.96	3.97	33819.4	14459.9	1218.9	783.8	5.9	7.2	2771	19.2	73	1550.5	1861.7	4648	105.83	3.4	4818	9.72	1.88	47434	56	157632	15.41	22.59	87.1	26.7	6	1216.22	1488.44	473.96	102.95	64	9.5	7.1	4.13	Jiangxi	0.1	-0.12
Hebei	2002	23.99	0.12	0.25	3.41	1.54	6679.7	2685.2	527.3	99.1	10.4	6.7	702	14.4	55	447.4	2304	6735	103.18	3.6	2039	6.5	4.3	9047	35.6	173491	127.9	73.8	58.78	7.4	5.63	206.64	329.88	96.36	74.28	227	2.18	0.4	7.81	Hebei	0.12	0.25
Hebei	2003	36.37	0.1	0.14	3.44	1.51	7239.1	2853.4	550.9	101.6	10.1	6.3	850	13.6	63	641.1	1724	6769	104.17	3.9	2057	6.65	1.44	10508	36.3	181230	142.2	70	55.97	7.1	6.36	224.11	340.73	98.93	75.09	175	2.25	0.54	7.35	Hebei	0.1	0.14
Hebei	2004	55.78	0.06	0.06	1.27	0.9	7951.3	3171.1	550.3	116	9.4	6.3	1373	14.3	54	522.2	2423.1	6809	104.52	4	2107	6.89	1.48	12918	37	206736	142.8	72.4	57.89	6.86	6	240.48	383.25	106.26	87.03	123	2.21	0.53	6.76	Hebei	0.06	0.06
Hebei	2005	60.71	0.12	0.11	3.58	1.47	9107.1	3481.6	642.7	134.8	9.6	6.2	1443	14.3	52	389.5	2274.1	6851	100.92	3.9	2132	7.15	1.54	14811	37.7	208524	149.6	73.3	57.7	8	6.27	254.27	402.39	112.43	89.81	132	2.48	0.75	7.18	Hebei	0.12	0.11
Hebei	2006	62.54	0.15	0.14	3.75	1.56	10304.6	3801.8	737.4	166.3	10	6.7	1630	14.6	55	407.8	2228.2	6898	102.17	3.8	2444	8.05	1.54	16894	38.4	222262	154.5	72.3	61.61	8.4	6.97	279.27	381.51	119.48	83.57	142	2.55	0.56	6.42	Hebei	0.15	0.14
Hebei	2007	63.82	0.15	0.13	4	1.73	11690.5	4293.4	833.5	188.1	10.1	6.7	1630	14.9	58.8	430.4	2167.7	6943	103.72	3.8	2376	8.98	1.56	20033	40.3	222914	149.2	62.3	55.17	6.8	6.33	318	465.17	132.78	104.65	128	2.6	0.72	6.25	Hebei	0.15	0.13
Hebei	2008	65.57	0.14	0.13	4.24	1.92	13441.1	4795.5	808.9	219.3	8.9	7	1712	14.6	56	707.7	2337.5	6989	103.96	4	2375	9.79	1.54	23239	41.9	234697	134.5	56.8	59.75	6.17	7.6	362.9	583.78	144.81	110.75	116	2.62	1.05	4.83	Hebei	0.14	0.13
Hebei	2009	63.06	0.15	0.17	4.45	2.09	14718.3	5149.7	971.3	289.3	10	8.6	1871	14.4	57	698.9	2275.3	7034	103.6	3.9	2344	9.02	1.72	24284	43	244989	125.3	51.9	53.66	7.21	7.22	383.7	554.41	156.9	109.09	104	2.61	0.89	4.88	Hebei	0.15	0.17
Hebei	2010	59.08	0.19	0.22	6.55	2.42	16263.4	5958	923.8	344.3	9	9	1871	14	55	432.9	2377.7	7194	102.84	3.9	2354	9.53	1.84	24581	44.5	262543	123.4	50	55.38	7.84	7.26	403.14	578.26	141.81	103.51	98	2.52	1.02	4.285	Hebei	0.19	0.22
Hebei	2011	53.92	0.15	0.17	7.78	2.73	18292.2	7119.7	956	434.7	8.2	9.2	2006	14.2	55	674.2	2201.8	7241	107.74	3.8	2362	10.44	1.86	30582.5	45.6	278551	141.21	132.25	78.74	9.47	8.97	390.51	716.53	153.67	126.47	99	3.32	1.36	3.69	Hebei	0.15	0.17
Hebei	2012	52.9	0.1	0.12	8.26	2.88	20543.4	8081.4	1047.3	543.7	8.4	10.1	2063	14	55	649.4	2288.2	7288	104.6	3.7	2411	11.29	1.96	36584	46.8	305773	134.12	123.59	71.8	10.18	10.42	412.78	764.95	177.91	125.99	98	3.31	1.28	3.77	Hebei	0.1	0.12
Hebei	2013	49.29	0.11	0.13	8.72	3.04	22580.3	9101.9	1117.3	696	8.2	11.3	2108	13.8	60	508.3	1716.8	7333	105.5	3.7	2483	12.62	2	38716	48.1	310921	128.47	131.33	75.3333	12.02	10.78	435.05	813.37	202.15	125.51	305	3.34	1.82	3.12	Hebei	0.11	0.13
Hebei	2014	48.15	0.1	0.12	9.21	3.17	24141.3	10186.1	1304.5	788.7	8.1	9.6	2141	14.9	55	294.8	1585.4	7384	104.91	3.6	2540	11.34	2.14	39984	49.3	309824	118.99	179.77	78.8667	13.86	11.14	457.32	861.79	226.39	125.03	206	3.37	2.36	3.14	Hebei	0.1	0.12
Hebei	2015	46.11	0.12		8.42	3.43	26152.2	11050.5	1549.9	928.2	8.5	10.2	2191	14.6	56	534.5	2004.1	7425	102.15	3.6	2646	12.94	2.2	40255	51.3	310568	110.84	157.54	82.4	15.7	11.5	479.59	910.21	250.63	124.55	147	3.4	2.9	3.86	Hebei	0.12	0.11
Hebei	2016	45.34	0.14		8.04	3.61	28249.4	11919.4	1549.9	928.2	8.1	9.5	2191	14.6	58	712.6	1917.1	7470	104.61	3.7	2659	13.68	2.37	42736.4	53.3	288795	78.94	125.68	81.7	15.4	11.8	501.86	958.63	274.87	124.07	164	3.9	3.4	4.1	Hebei	0.14	0.1
Hebei	2017	41.94	0.11		7.8	4.06	30547.8	12880.9	1737.3	1072.6	8.4	10.2	2328	15	54	558.5	2242.9	7520	103.14	3.7	2675	15.34	2.55	47985	55	253685	60.24	80.37	75.1	15.9	13	524.13	1007.05	299.11	123.59	154	3.7	3.2	3.48	Hebei	0.11	0.09
Hebei	2018	39.31	0.16		7.53	4.51	32977.2	14030.9	1883.7	1201.6	8.5	10.6	2457	14.6	53	351.7	2044.8	7556	101.67	3.3	3210	14.62	2.8	47772	56.4	218575	41.54	35.06	83.7	19	11.8	546.4	1055.47	323.35	123.11	131	4.2	3.9	3.95	Hebei	0.16	0.08
Henan	2002	38.32	0.01	0.01	3.43	1.2	6245.4	2215.7	389.6	73.8	8.6	5.1	487	15.4	59	628.7	1862	9613	103.84	2.9	1357	4.8	3.45	6431	25.3	238539	93.7	68.2	154.5	12.12	9.3	168.6	293.88	37.56	63	103	1.09	1.77	9.14	Henan	0.01	0.01
Henan	2003	47.73	0.02	0.03	3.53	1.22	6926.1	2235.7	443.3	91.4	9	6.1	576	14.4	67	1010.6	1392	9667	107.35	3.1	3706	6.54	1.1	7530	27.1	239766	103.9	69.2	100.11	6.48	8.01	189.63	317.97	39.28	65.96	107	1.35	1.23	9.21	Henan	0.02	0.03
Henan	2004	68.47	0.05	0.08	1.17	0.83	7704.9	2553.2	436.5	95.2	8.2	5.7	944	15.5	62	767.4	1764.2	9717	106.02	3.4	5307	7.21	1.13	9470	28.9	250652	125.6	76.7	92.39	9.17	7.49	210.97	354.01	39.93	73.57	111	1.27	1.24	8.08	Henan	0.05	0.08
Henan	2005	109.55	0.27	0.28	3.56	1.24	8668	2870.6	472.3	123.4	7.8	6.5	1119	14.9	59	728.8	1740.9	9380	103.21	3.5	5405	7.77	1.18	11265	30.7	262564	162.5	92.8	100.75	6.43	8.48	217.28	371.16	43.54	76.06	109	1.3	1.57	9.79	Henan	0.27	0.28
Henan	2006	95.98	0.28	0.31	3.69	1.26	9810.3	3261	520.6	140.6	7.8	6.3	1331	15.8	62	692.6	1804.2	9392	102.8	3.5	5306	7.09	1.23	13279	32.5	278022	162.4	79.6	99.63	7.19	10.1	245.65	362.51	47.61	71.76	111	1.39	1.6	8.64	Henan	0.28	0.31
Henan	2007	95.73	0.36	0.35	3.79	1.36	11477.1	3851.6	626.6	173.2	8	6.5	1331	15.9	59.2	596.4	1747.2	9360	103.85	3.4	5902	7.8	1.24	16060	34.3	296467	156.4	71.3	102.06	6.1	8.94	299.83	485.25	58.13	98.56	105	1.48	1.76	7.91	Henan	0.36	0.35
Henan	2008	92.85	0.25	0.25	4.05	1.55	13231.1	4454.2	790.9	215	8.9	7.1	1455	15.6	58	658.2	1850.6	9429	102.27	3.4	5967	7.98	1.13	19593	36	309193	145.2	61.3	121.66	5.01	10.4	323.69	569.41	65.25	96.05	94	1.45	2.38	7.36	Henan	0.25	0.25
Henan	2009	82.48	0.31	0.34	4.42	1.75	14371.6	4807	875.5	242.9	9.2	7.2	1774	15.5	61	762.5	1866.8	9487	102.53	3.5	4886	8.15	1.42	20477	37.7	333981	135.5	59.7	93.64	6.16	10.57	371.3	575.61	75.84	96.47	99	1.5	2.4	6.59	Henan	0.31	0.34
Henan	2010	73.11	0.25	0.28	6.36	2.05	15930.3	5523.7	941.3	287.8	8.7	7.8	1774	15.6	56	600.3	1727.1	9405	102.06	3.4	5178	7.58	1.43	20597	38.5	358679	133.9	54.7	88.03	8.52	9.1	373.02	611.01	78.49	110.61	111	1.5	2.28	6.145	Henan	0.25	0.28
Henan	2011	69.91	0.21	0.24	7.03	2.31	18194.8	6604	919.8	399.7	7.5	9.3	1901	15.1	56	706.5	1603	9388	107.82	3.4	5124	8.68	1.43	26160	40.6	378785	137.05	66.82	68.63	6.61	7.89	375.92	756.56	89.38	134.03	103	1.79	2.53	5.7	Henan	0.21	0.24
Henan	2012	72.64	0.21	0.23	7.96	2.62	20442.6	7524.9	1085.5	468.8	7.9	9.3	2012	15.5	53	498.7	1883.7	9406	102.26	3.1	4964	8.6	1.78	31723	42.4	403668	127.59	59.98	70.46	6.93	9.06	400.7	796.87	105.77	131.49	105	1.74	2.27	5.36	Henan	0.21	0.23
Henan	2013	67.06	0.22	0.25	8.44	2.86	22398	8475.3	1054.5	603.7	7.1	10.7	2114	16.1	53	353.2	1925.6	9413	101.09	3.1	4982	9.07	1.64	34174	43.8	412582	125.4	64.13	69.54	8.88667	9.60667	425.48	837.18	122.16	128.95	171	1.99333	2.81333	4.88	Henan	0.22	0.25
Henan	2014	66.5	0.21	0.24	8.9	3.03	23672.1	9966.1	1204.1	731.4	7.4	10.1	2293	16.3	58	551.6	1894.2	9436	102.33	3	5149	9.75	2.01	37073	45.2	422832	119.82	88.21	68.62	10.8433	10.1533	450.26	877.49	138.55	126.41	158	2.24667	3.35667	4.54	Henan	0.21	0.24
Henan	2015	62.74	0.12		9.36	3.19	25575.6	10852.9	1524.5	797.8	8	9.7	2352	15.9	62	689.1	1729.5	9480	103.99	3	5155	10.14	2.1	39131	46.9	433487	114.43	84.61	67.7	12.8	10.7	475.04	917.8	154.94	123.87	167	2.5	3.9	5.25	Henan	0.12	0.23
Henan	2016	60.13	0.16		9.89	3.37	27232.9	11696.7	1524.5	797.8	8.4	9.3	2352	16.4	63	833	1915.8	9532	103.89	3	5056	10.88	2.17	42247	48.5	402055	41.36	42.89	73.7	12.4	11.3	499.82	958.11	171.33	121.33	143	2.8	4.5	5.65	Henan	0.16	0.22
Henan	2017	58.03	0.19		10.37	3.61	29557.9	12719.2	1611.5	909	8.3	9.9	2455	16.8	60	598.8	2115.6	9559	104.49	2.8	4871	12.28	2.3	47130	50.2	409107	28.63	22.34	72.6	12.7	13	524.6	998.42	187.72	118.79	108	2.5	4.2	5	Henan	0.19	0.21
Henan	2018	55.16	0.19		10.83	4.01	31874.2	13830.7	1925.2	1226.6	9.2	11.8	2653	16.5	58	609.5	2006	9605	102.45	3	4903	12.59	2.45	50152	51.7	416159	15.9	1.79	71.4	15.7	11.3	549.38	1038.73	204.11	116.25	106	2.7	5.2	4.83	Henan	0.19	0.2
Zhejiang	2002	53.13	0.05	0.13	2.7	1.88	11715.6	4940.4	667.8	266.5	7.7	7.2	846	17.4	74	1742.8	1434	4647	102.89	4.2	1043	8.9	2.59	16570	54.5	259099	62.4	19.7	87.32	16.13	4.89	319.32	456.72	552.96	47.88	128	14.03	5.47	13.54	Zhejiang	0.05	0.13
Zhejiang	2003	58.52	0.05	0.13	2.91	1.92	13179.5	5389	738.5	306.3	7.6	7.1	1034	17.4	71	947.7	1726	4680	102.4	4.2	1117	9.91	1.69	19730	55	270262	73.4	20.5	83.91	16.42	5.33	311.38	474.87	547.1	47.89	119	14.64	6.03	13.23	Zhejiang	0.05	0.13
Zhejiang	2004	91.34	0.13	0.18	2.1	0.63	14546.4	5944.1	828.8	326.1	7.8	7	1651	17.8	70	1046.5	1874.9	4720	102.67	4.1	1189	11.09	1.76	23942	55.5	281326	81.4	21.9	81.4	15.01	5.37	336.02	536.78	499.77	51.83	110	14.9	5.36	13.4	Zhejiang	0.13	0.18
Zhejiang	2005	95.95	0.25	0.23	3.29	1.95	16293.8	6660	831.8	415.6	6.8	7.7	1886	17.5	69	1138.6	1762.2	4898	102.95	3.7	1270	11.71	1.8	27369	56	313196	86	21.2	82.03	17.77	4.59	335.17	578.97	515.79	56.65	112	15.47	6.45	11.95	Zhejiang	0.25	0.23
Zhejiang	2006	88.74	0.2	0.21	3.47	2	18265.1	7334.8	852.3	459.4	6.4	7.6	2115	18.2	71	1164.3	1422.8	5072	101.87	3.5	2087	9.33	1.86	31684	56.5	330694	85.9	20.6	83.34	17.87	4.76	364.56	549.4	552.44	54.75	111	16	5.9	10.2	Zhejiang	0.2	0.21
Zhejiang	2007	86.27	0.23	0.22	3.64	1.96	20573.8	8265.2	859.1	452.4	6.1	6.7	2115	18.4	71.3	1378.5	1472.9	5155	104.68	3.3	1748	11.34	1.9	37128	57.2	338101	79.7	18.2	82.41	14.92	4.63	385.03	672.5	597.85	65.97	107	16.89	6.26	10.12	Zhejiang	0.23	0.22
Zhejiang	2008	80.26	0.19	0.18	3.77	2.01	22726.7	9257.9	933.1	532.1	6.2	7.1	2246	17.5	70	1273.9	1641.2	5212	103.62	3.5	1757	13.24	2.17	42214	57.6	350377	74.1	17.5	80.81	14.28	4.99	413.54	813.32	595.76	73.91	110	16.66	6.7	9.38	Zhejiang	0.19	0.18
Zhejiang	2009	71.41	0.2	0.18	3.95	2.11	24610.8	10007.3	984.6	609.1	5.9	7.9	2303	17.8	71	1453.9	1709.9	5276	101.93	3.3	1742	13.7	2.41	44335	57.9	365017	70.1	19	76.88	15.43	4.94	447.96	773.49	623.01	74.58	97	17.45	6.3	8.06	Zhejiang	0.2	0.18
Zhejiang	2010	63.89	0.18	0.19	5.69	2.58	27359	11302.6	1033.7	709.3	5.8	7.9	2303	17.4	72	1728.1	1689.3	5447	105.69	3.2	1773	11.87	2.54	44641	61.6	394828	67.8	17.4	73.52	16	4.83	543.17	845.32	713.79	85.88	98	16	6.13	7.16	Zhejiang	0.18	0.19
Zhejiang	2011	59.56	0.17	0.2	6.61	2.9	30970.7	13070.7	1248.9	921.3	6.1	9.2	2218	17.2	69	1359.9	1496.1	5463	95.77	3.1	1741	13.55	2.6	53953.5	62.3	420134	66.2	32.33	69.54	17.71	5.15	582.55	1048.8	811.65	105.45	93	16	6.43	6.26	Zhejiang	0.17	0.2
Zhejiang	2012	58.86	0.13	0.16	7.61	3.18	34550.3	14551.9	1228	746.1	5.7	7	2288	17.1	71	1728.8	1520.5	5477	104.58	3	1786	13.96	2.37	63266	63.2	420961	62.58	25.4	68.04	16.93	5.56	660.54	1128.3	949.22	108.24	87	15.97	6.1	5.12	Zhejiang	0.13	0.16
Zhejiang	2013	53	0.09	0.13	7.22	3.44	37850.8	16106	1244.4	943.9	5.4	8	2363	18	68	1520.9	1665.5	5498	107.54	3	1818	14.64	2.86	68462	64	419120	59.34	31.97	73.7933	20.0867	5.97333	738.53	1207.8	1086.79	111.03	106	17.18	6.83333	5.38	Zhejiang	0.09	0.13
Zhejiang	2014	54.05	0.1	0.13	8.05	3.57	40392.7	19373.3	1527	1068.3	5.6	7.4	2414	17.5	73	1359.9	1407.2	5508	109.98	3	1828	15.46	2.65	72967	64.9	418262	57.4	37.97	79.5467	23.2433	6.38667	816.52	1287.3	1224.36	113.82	98	18.39	7.56667	5.85	Zhejiang	0.1	0.13
Zhejiang	2015	50.8	0.1		8.99	3.85	43714.5	21125	1691.9	1173.2	5.4	7.7	2355	17.5	75	2131.9	1315.8	5539	107.37	2.9	1914	15.99	2.9	77644	65.8	433822	53.78	33.02	85.3	26.4	6.8	894.51	1366.8	1361.93	116.61	85	19.6	8.3	5.87	Zhejiang	0.1	0.13
Zhejiang	2016	48.78	0.09		8.58	4.25	47237.2	22866.1	1691.9	1173.2	5.6	6.8	2355	18.2	75	1797.3	1522.4	5590	108.56	2.9	2059	16.27	3.01	83538.5	67	430857	26.84	18.23	90.9	26.6	7.6	972.5	1446.3	1499.5	119.4	79	18.5	9.2	5.99	Zhejiang	0.09	0.13
Zhejiang	2017	47.54	0.1		9.29	4.44	51260.7	24955.8	1871.8	1370.2	5.9	7.6	2345	18.3	71	1442	1818.4	5657	111.48	2.7	2109	16.93	3.16	92057	68	453935	19.05	15.34	94.8	27.2	8.1	1050.49	1525.8	1637.07	122.19	72	18.6	9	5.4	Zhejiang	0.1	0.13
Zhejiang	2018	45.26	0.12		9.11	4.84	55574.3	27302.4	2286.6	1626.9	6.6	8.3	2370	18.1	74	1810.2	1744.2	5737	107.97	2.6	2137	16.1	3.33	98643	68.9	477013	11.26	12.45	92.8	30	8	1128.48	1605.3	1774.64	124.98	68	18.5	9.4	4.93	Zhejiang	0.12	0.13
Hainan	2002	40.98	0.1	0.14	2.56	1.7	6822.7	2423.2	301.4	62.3	5.5	3.9	432	25	82	1781.3	1706	803	110.08	3.1	3013	8.1	0.73	8054	42.5	23885	2.2	1.1	67.54	15.11	0.6	227.4	656.88	353.52	25.68	27	16.3	8.32	15.13	Hainan	0.1	0.14
Hainan	2003	61.99	0.13	0.14	2.5	1.61	7259.3	2588.1	413.9	96.1	7.5	5.8	536	25.2	80	1421.4	2002	811	113.33	3.4	851	4.36	1.46	8655	43.4	26051	2.3	1.1	86.61	15.4	1.31	236.65	679.38	353.23	25.83	30	14.75	9.77	11.83	Hainan	0.13	0.14
Hainan	2004	123.21	0.22	0.18	1.54	0.6	7735.8	2817.6	350.2	86.6	6	5	977	24.7	80	983.6	2069.3	818	109.07	3.4	3421	5.62	1.48	9450	44.3	33055	2.3	1.1	67.44	13.26	1.28	240.79	769.1	385.06	27.86	33	16.16	9.09	11.47	Hainan	0.22	0.18
Hainan	2005	137.28	0.47	0.34	2.51	1.54	8123.9	3004	351.1	93	5.9	4.7	1133	25.1	78	1187	1840.5	828	110.46	3.6	2931	6.49	1.43	10819	45.2	35274	2.2	1.1	71.19	18.49	1.23	268.93	810.09	398.99	35.1	40	15.07	10.02	12.09	Hainan	0.47	0.34
Hainan	2006	140.54	0.61	0.48	2.6	1.65	9395.1	3255.5	369.3	110.9	5.2	5	1374	25.4	78	1547.7	1848.8	836	109.93	3.6	3230	7.85	1.46	12650	46.1	35357	2.4	1.1	63.68	18.59	1.47	291.54	823.87	434.19	35.57	41	15.16	10.05	9.83	Hainan	0.61	0.48
Hainan	2007	143.62	0.63	0.48	2.67	1.73	10996.9	3791.4	503.8	95.6	6.1	3.7	1374	24.1	80	1419.3	1669.1	845	109.95	3.5	2525	6.8	1.49	14631	47.2	35159	2.6	1	98.86	15.07	1.5	342.16	1015.68	477.21	38.14	43	15.16	9.99	8.7	Hainan	0.63	0.48
Hainan	2008	139.16	0.57	0.43	2.78	1.77	12607.8	4390	536.4	123.8	5.7	4.3	1602	23.4	79	2391.2	1706.5	854	109.81	3.7	2731	7.4	1.49	17175	48	36188	2.2	0.9	63.44	13.93	2.61	394.54	1230.02	567.26	45.25	43	17.59	12.17	7.69	Hainan	0.57	0.43
Hainan	2009	110.13	0.65	0.63	2.9	1.88	13750.9	4744.4	604.2	129.3	6	4.2	2001	24.3	81	2628.2	1861.1	864	114.17	3.5	2568	7.77	1.6	19166	49.1	37517	2.2	1	82.16	17.62	1.91	449.38	1202.19	619.24	42.45	38	15.66	12.64	7.81	Hainan	0.65	0.63
Hainan	2010	109.66	0.42	0.43	4.14	2.26	15581.1	5275.4	579.9	138.4	5.3	4	2001	24.6	81	2445.1	1823.3	869	110.9	3	2739	8.61	1.61	19254	49.8	36689	2.9	0.9	80.69	15.75	2.11	528.01	1285.53	669.83	51.22	40	15.74	14.11	6.835	Hainan	0.42	0.43
Hainan	2011	107.07	0.44	0.44	5.33	2.43	18369	6446	783.3	290.1	6.2	7	2079	23.3	81	2002.1	1482.6	877	108.28	1.7	2639	10.76	1.71	25814	50.5	35725	3.26	1.58	68.79	17.68	1.75	580.75	1681.02	770.92	58.42	41	16.85	14.44	5.86	Hainan	0.44	0.44
Hainan	2012	106.67	0.28	0.28	5.84	2.56	20917.7	7408	993.2	306.5	6.9	6.4	2218	24.6	82	2094.3	1766.4	887	113.6	2	2079	11.6	1.75	32374	51.6	37103	3.41	1.66	60.65	18.34	2.43	726.07	1840.3	963.24	60.81	34	20.92	14.02	5.87	Hainan	0.28	0.28
Hainan	2013	95.27	0.31	0.32	6.19	2.68	22928.9	8342.6	734.3	362.2	4.7	6.6	2253	24.3	82	2067	1725.7	895	111.71	2.2	1946	11.48	1.84	35317	52.7	36156	3.24	1.8	65.3333	20.2933	2.88667	871.39	1999.58	1155.56	63.2	47	21.1133	14.78	5.3	Hainan	0.31	0.32
Hainan	2014	97.02	0.24	0.24	6.14	2.97	24486.5	9912.6	960.3	454.1	5.5	6.5	2290	24.7	83	1861.3	2112	903	115.37	2.3	2069	11.97	1.95	38924	53.8	39351	3.26	2.32	70.0167	22.2467	3.34333	1016.71	2158.86	1347.88	65.59	42	21.3067	15.54	3.07	Hainan	0.24	0.24
Hainan	2015	97.92	0.24		8.63	2.82	26356.4	10857.6	1399.8	593	7.1	7.7	2258	25.3	81	1673.2	2406.7	911	110.47	2.3	2045	11.25	2.1	40818	55.1	39123	3.23	2.04	74.7	24.2	3.8	1162.03	2318.14	1540.2	67.98	40	21.5	16.3	5.31	Hainan	0.24	0.16
Hainan	2016	73.34	0.18		9.05	2.81	28453.5	11842.9	1399.8	593	7.4	6.6	2258	24.6	82	1913.7	2084.3	917	111.46	2.4	2050	11.35	2.17	44251.9	56.8	44097	1.7	2.08	76.6	25.7	3.8	1307.35	2477.42	1732.52	70.37	39	22	18.2	4.63	Hainan	0.18	0.08
Hainan	2017	86.3	0.71		8.89	3.07	30817.4	12901.8	1505.1	629.5	7.4	6.6	2261	24.6	82	2009.4	1994	926	110.02	2.3	2070	13.54	2.24	48430	58	44081	1.43	2.09	75.1	24	3.4	1452.67	2636.7	1924.84	72.76	37	21.2	17.5	4.23	Hainan	0.71	0
Hainan	2018	85.05	0.45		9.47	3.14	33348.7	13988.9	1669.8	712.4	7.3	6.5	2305	24.4	82	2135.3	2040.9	934	104.69	2.3	2460	12.67	2.39	51955	59.1	44065	1.16	2.1	80.8	31.7	3.9	1597.99	2795.98	2117.16	75.15	35	24.1	18	3.97	Hainan	0.45	-0.08
Hubei	2002	49.44	0.02	0.06	2.52	1.21	6788.5	2444.1	370.6	90.5	6.6	5.2	977	17.9	74	1516.1	1555	5988	104.55	4.3	502	5.9	2.93	8319	41.4	232347	53.9	29.6	150.61	18.47	3.47	226.08	390.48	114.84	50.52	136	7.31	2.07	15.13	Hubei	0.02	0.06
Hubei	2003	70.57	0.01	0.02	2.56	1.36	7322	2566.8	397.5	95.5	6.7	5.3	1202	17.4	73	1385.3	1628	6002	104.81	4.3	619	6.78	1.45	9001	42	230578	60.9	29.3	159.76	19.86	3.86	257.12	430.47	119.35	50.47	133	8.1	2.74	11.83	Hubei	0.01	0.02
Hubei	2004	99.55	0.07	0.06	1.66	0.48	8022.8	2890	461.4	110.7	7.2	5.3	1999	18.3	70	1572.2	1918	6016	102.76	4.2	613	7.01	1.49	10500	42.6	232629	69.2	30.6	147.73	17.85	3.99	285.17	466.77	131.82	56.61	130	7.21	2.48	11.47	Hubei	0.07	0.06
Hubei	2005	113.44	0.5	0.36	2.6	1.32	8785.9	3099.2	499.3	135.4	7.4	5.6	2176	17.8	69	1116.6	1829.7	5710	103.54	4.3	628	7.8	1.57	11390	43.2	237368	71.7	33	152.47	21.07	4.14	305.48	498.91	147.29	58.95	119	8.11	3.02	12.09	Hubei	0.5	0.36
Hubei	2006	108.23	0.28	0.2	2.64	1.35	9802.7	3419.4	517.2	172.4	7	6.3	2542	18.3	71	1047.1	1919.3	5693	102.47	4.2	1890	10.55	1.58	13150	43.8	239670	76	30.7	143.75	21.44	4.15	348.32	473.15	152.02	59.88	121	8.51	2.91	9.83	Hubei	0.28	0.2
Hubei	2007	112.43	0.41	0.28	2.73	1.44	11485.8	3997.5	525.3	178.8	6	5.8	2542	18.5	66.8	1023.2	1934.2	5699	103.39	4.2	1732	11.88	1.62	16064	44.3	246582	70.8	25	143.57	18.35	4.17	415.43	654.29	185.01	78.73	123	9.38	3.3	8.7	Hubei	0.41	0.28
Hubei	2008	107.55	0.24	0.17	3	1.64	13152.9	4656.4	675.3	210.4	7.1	5.8	2683	17.6	71	1266.8	1774.1	5711	102.88	4.2	1823	11.89	1.51	19860	45.2	258874	67	22.9	132.58	18.01	4.69	488.61	886	227	91.41	113	8.71	3.23	7.69	Hubei	0.24	0.17
Hubei	2009	90.7	0.41	0.37	3.31	1.88	14367.5	5035.3	694.6	236.3	6.7	6.3	2829	17.9	71	1158	1790.9	5720	105.15	4.2	1845	11.02	1.59	22450	46	265757	64.4	21.6	137.04	18.62	4.93	542.84	822.61	238.65	87.93	105	8.34	3.22	7.81	Hubei	0.41	0.37
Hubei	2010	84.75	0.42	0.38	4.75	2.16	16058.4	5832.3	709.6	295.2	6.2	7.2	2829	16.6	77	1337.9	1544	5728	105.56	4.2	1929	9.47	1.62	22677	49.7	270755	63.3	19.3	137.51	18.55	4.47	615.32	853.27	267.47	96.35	108	8.33	2.91	6.835	Hubei	0.42	0.38
Hubei	2011	88.11	0.32	0.3	6.05	2.52	18373.9	6897.9	915.7	438.2	7	8.7	2991	16.3	77	987.2	1741.4	5758	105.67	4.1	1969	11.17	1.66	30624.5	51.8	293064	66.56	34.61	131.68	18.05	5.03	653.65	1083.3	294.01	111.11	100	8.38	3.23	5.86	Hubei	0.32	0.3
Hubei	2012	87.67	0.27	0.26	7.03	2.86	20839.6	7851.7	1029.6	591.9	7.1	10.3	3078	16.4	81	1415.5	1553.9	5779	103.83	3.8	2004	11.25	1.89	38572	53.5	290200	62.24	34.97	119.33	18.17	5.02	703.01	1118.08	334.46	115.2	97	8.54	2.94	5.87	Hubei	0.27	0.26
Hubei	2013	83.14	0.2	0.21	7.23	3.58	22906.4	8867	1033.5	624.4	6.6	9.9	3144	17.1	77	1434.2	2092.5	5799	103.33	3.5	2505	11.56	1.9	42613	54.5	294054	59.94	35.95	120.587	21.08	6.11333	752.37	1152.86	374.91	119.29	124	9.59333	3.39333	5.3	Hubei	0.2	0.21
Hubei	2014	79.58	0.21	0.22	7.97	4.03	24852.3	10849.1	1187.8	907.3	7.1	10.5	3038	16.7	79	1208.6	1596.3	5816	103.9	3.1	2448	11.91	2.17	47124	55.7	301704	58.38	50.4	121.843	23.99	7.20667	801.73	1187.64	415.36	123.38	114	10.6467	3.84667	5.54	Hubei	0.21	0.22
Hubei	2015	78.14	0.2		8.64	4.28	27051.5	11843.9	1792	1213.5	8.1	10	2950	16.8	81	1432.8	1624.7	5852	104.12	2.6	2430	11.84	2.3	50654	56.9	313785	55.14	44.7	123.1	26.9	8.3	851.09	1222.42	455.81	127.47	104	11.7	4.3	5.96	Hubei	0.2	0.23
Hubei	2016	74.7	0.44		8.81	4.52	29385.8	12725	1792	1213.5	8.9	11.1	2950	17.3	80	1827.1	1614.6	5885	105.49	2.4	2475	12.76	2.41	55038.4	58.1	274787	28.56	27.58	123.2	24.5	8.1	900.45	1257.2	496.26	131.56	92	12.2	4.6	5.64	Hubei	0.44	0.24
Hubei	2017	68.33	0.23		9.05	4.75	31889.4	13812.1	2165.5	1438.3	10.2	12.4	3000	17.3	81	1107.3	1662	5902	106.34	2.6	2746	12.38	2.5	61972	59.3	272694	22.01	18.8	113	23.5	7.3	949.81	1291.98	536.71	135.65	85	11.1	4	5.69	Hubei	0.23	0.25
Hubei	2018	63.49	0.19		9.13	5.05	34454.6	14977.8	2162.8	1588	9	11.4	3088	17.3	78	1110.6	1797.2	5917	106.15	2.6	2804	10.98	2.57	66616	60.3	270601	15.46	10.02	113.8	26.8	6.6	999.17	1326.76	577.16	139.74	73	13.1	4.7	4.81	Hubei	0.19	0.26
Hunan	2002	39.44	0.08	0.16	3.09	1.35	6958.6	2397.9	343.7	102.8	6.2	5	633	17.7	79	1594.3	1375	6629	107.98	4	1175	6.7	5.53	6565	31.9	220177	74.3	43.4	170.22	19.37	3.39	210.48	434.04	102.36	42.84	130	5.95	3.85	8.35	Hunan	0.08	0.16
Hunan	2003	57.27	0.07	0.11	3.32	1.36	7674.2	2532.9	391.3	105.2	6.4	4.9	806	17.6	76	1065.1	1470	6663	108.41	4.5	1123	7.5	1.36	7546	33.6	235777	84.8	48.3	149.44	17.51	3.28	238.9	465.63	100.92	44.59	135	6.89	3.89	8.47	Hunan	0.07	0.11
Hunan	2004	64.2	0.1	0.12	1.17	0.9	8617.5	2837.8	475.6	124.1	6.9	5	1267	18.3	72	1346.5	1626.2	6698	105.24	4.4	1110	8.88	1.34	9117	35.3	250007	87.2	53.1	145.68	17.06	3.39	244.21	550.11	119.83	54.74	140	5.4	4.16	7.44	Hunan	0.1	0.12
Hunan	2005	97.17	0.37	0.28	3.57	1.37	9524	3117.7	601.3	168.2	8	6.1	1452	17.7	73	1600.9	1423.1	6326	104.67	4.3	1135	8.86	1.46	10264	37	255638	91.9	53.9	140.07	20.56	3.38	257.1	582.66	132.31	54.52	122	6.23	4.61	8.58	Hunan	0.37	0.28
Hunan	2006	92	0.35	0.28	3.69	1.43	10504.7	3389.6	632.5	196.5	7.7	6.5	1719	18.5	72	1310.4	1681.7	6342	103.85	4.3	3164	8.98	1.39	11830	38.7	244134	93.4	49.1	134.33	19.97	3.36	297.16	569.94	133.68	53.68	111	5.97	4.47	6.52	Hunan	0.35	0.28
Hunan	2007	104.15	0.35	0.28	3.83	1.59	12293.5	3904.2	668.5	220	7.4	6.5	1719	18.8	69.6	936.4	1742.2	6355	106.25	4.3	3753	10.62	1.46	14405	40.5	252073	90.4	44.3	131.46	16.91	3.24	350.46	719.79	161.54	59.39	104	7.03	5.04	5.35	Hunan	0.35	0.28
Hunan	2008	99.87	0.25	0.19	4.02	1.74	13821.2	4512.5	791	244.2	8	6.4	1838	18.3	73	1452.9	1763	6380	107.1	4.2	3380	10.89	1.39	17521	42.2	250331	84	37.8	138.86	15.85	3.64	413.02	959.37	202.67	68.78	97	6.32	5.42	5.87	Hunan	0.25	0.19
Hunan	2009	92.87	0.41	0.37	4.45	1.96	15084.3	4909	784.7	258.1	7.2	6.4	2040	18.5	72	1216.6	1807.6	6406	104.89	4.1	3276	10.59	1.51	20226	43.2	260279	81.2	34.2	139.16	17.98	3.71	464.09	898.83	213.31	71.93	92	6.19	5.49	5.04	Hunan	0.41	0.37
Hunan	2010	88.59	0.35	0.39	6.33	2.33	16565.7	5622	776.9	293.6	6.6	6.8	2040	18.2	74	1626.4	1708.9	6570	105.81	4.2	2992	10.01	1.56	20428	43.3	268110	80.1	31.2	133.39	17.65	3.86	512.8	918.32	219.42	75.51	83	5.92	5.1	4.635	Hunan	0.35	0.39
Hunan	2011	86.76	0.33	0.37	7.28	2.75	18844.1	6567.1	790.8	396.5	5.9	7.7	2054	17.9	72	932.8	1702.8	6596	105.98	4.2	2908	10.36	1.58	26954	45.1	278811	68.55	38.44	122.99	18.65	4.65	558.9	1126.05	233.01	92.1	83	6.65	6.48	4.23	Hunan	0.33	0.37
Hunan	2012	90.62	0.3	0.35	7.9	3.12	21318.8	7440.2	918.4	497.2	6.3	8.5	2087	17.6	76	1730	1493.6	6639	106.57	4.2	3030	10.38	1.75	33480	46.7	304214	64.5	34.07	121.79	18.16	4.92	627.38	1172.72	272.49	96.52	88	6.23	6.08	4.04	Hunan	0.3	0.35
Hunan	2013	89.01	0.33	0.4	8.69	3.39	23414	8372.1	1078.8	638.3	6.8	9.7	2106	19.2	67	1254.9	2049.7	6691	105.7	4.2	3317	10.8	1.78	36763	48	307227	64.13	35.87	115.827	21.1733	5.71333	695.86	1219.39	311.97	100.94	94	7.05333	7.08667	3.12	Hunan	0.33	0.4
Hunan	2014	85.88	0.32	0.42	10.18	3.77	26570.2	10060.2	1209.8	771.4	6.6	8.5	2215	18.6	69	1386.8	1634.4	6737	105.29	4.1	3402	12.46	1.98	40287	49.3	309960	62.37	49.62	109.863	24.1867	6.50667	764.34	1266.06	351.45	105.36	84	7.87667	8.09333	4.54	Hunan	0.32	0.42
Hunan	2015	83	0.35		10.68	4.29	28838.1	10992.5	1362.6	986.5	6	8.7	2251	17.4	83	1538.3	1263.4	6783	102.98	4.1	3261	13.64	2.2	42968	50.9	314107	59.55	45.45	103.9	27.2	7.3	832.82	1312.73	390.93	109.78	76	8.7	9.1	3.37	Hunan	0.35	0.44
Hunan	2016	75.5	0.19		11.41	4.53	31283.9	11930.4	1362.6	986.5	6.4	9.3	2251	17.5	83	1704.8	1502.5	6822	104.51	4.2	3523	15.13	2.35	45931	52.8	298757	34.68	26.21	100.3	26	7.6	901.3	1359.4	430.41	114.2	73	9	10.3	3.39	Hunan	0.19	0.46
Hunan	2017	76.07	0.4		11.88	4.81	33947.9	12935.8	1693	1171.8	7.3	10.2	2419	17.7	77	1684.2	1498.9	6860	101.68	4	3883	14.43	2.52	50563	54.6	300563	21.46	20.71	103.2	28.8	7.9	969.78	1406.07	469.89	118.62	69	8.9	10.9	3.13	Hunan	0.4	0.48
Hunan	2018	78.75	0.41		12.1	5.24	36698.3	14092.5	2034.4	1385.5	8.1	10.9	2610	17.7	78	1241.5	1716.2	6899	101.51	3.6	3174	15.49	2.62	52949	56	302369	8.24	15.21	86.6	32.3	7.7	1038.26	1452.74	509.37	123.04	61	9.3	10.7	3.12	Hunan	0.41	0.5
Gansu	2002	48.51	0.19	0.23	4.24	1.46	6151.4	1590.3	415.1	82.7	8.2	7.2	551	11	49	279.7	2419	2593	105.49	3.2	212	3.9	1.61	4493	26.7	37557	42.7	15.6	40.75	9.31	2.26	203.64	273	40.32	43.8	176	0.22	0.96	18.74	Gansu	0.19	0.23
Gansu	2003	68.08	0.26	0.25	4	1.44	6657.2	1673.1	434.8	96.2	8.2	7.2	666	10.8	51	324.1	2414	2603	105.31	3.4	3929	5.67	1.35	4984	27.8	47893	49.4	19.6	40.02	10.8	2.14	221.6	290.95	41.67	45.87	174	0.24	1.11	19.68	Gansu	0.26	0.25
Gansu	2004	76.26	0.11	0.09	1.22	1.02	7376.7	1852.2	412	85.3	6.9	5.8	1089	10.9	45	209.1	2565	2619	106.34	3.4	5880	5.57	1.32	5970	28.9	45171	48.4	15.8	40.55	10.04	1.76	236.02	334.78	46.44	49.75	172	0.25	0.83	16.98	Gansu	0.11	0.09
Gansu	2005	87.59	0.25	0.24	4.3	1.45	8086.8	1979.9	492.2	114	7.5	6.3	1211	7.2	64	431.4	2469.9	2594	101.83	3.3	6031	6.31	1.36	7455	30	43728	56.3	16.2	43.57	16.56	1.66	213.04	358.26	50.45	56.95	158	0.21	0.81	21.41	Gansu	0.25	0.24
Gansu	2006	108.23	0.3	0.3	4.18	1.54	8920.6	2134.1	562.7	127.4	8.1	6.9	1427	8.5	56	208.9	2508.9	2547	102.53	3.6	3891	6.08	1.41	8749	31.1	45721	54.6	15.9	39.1	16.13	1.75	250	327.49	48.56	48.78	192	0.29	0.86	18.79	Gansu	0.3	0.3
Gansu	2007	119.17	0.24	0.24	4.32	1.64	10012.3	2328.9	564.3	149.8	7.2	7.4	1427	11.1	53.3	407.9	2214.1	2548	102.82	3.3	3807	7.64	1.38	10335	31.6	44335	52.3	13.3	38.86	13.54	1.66	304.05	403.59	62.16	60.53	129	0.28	0.75	16.59	Gansu	0.24	0.24
Gansu	2008	128.29	0.22	0.23	4.58	1.81	10969.4	2723.8	654.8	164.7	7.9	6.9	1548	10.6	52	305.4	2355.1	2551	102.39	3.2	3802	8.11	1.35	12110	32.2	47470	50.2	13.7	42.37	12.51	2.17	333.6	492.51	58.58	62.16	132	0.29	1.15	14.58	Gansu	0.22	0.23
Gansu	2009	111.22	0.28	0.33	4.67	1.98	11929.9	2980.1	746.8	180.1	8.4	6.5	1806	8	53	185.9	2376.9	2555	103.8	3.3	3814	8.2	1.39	12852	32.7	49271	50	16.2	39.06	12.25	2.51	363.79	489.66	65.27	62.07	150	0.37	1.04	13.21	Gansu	0.28	0.33
Gansu	2010	90.64	0.27	0.33	4.57	2.53	13188.6	3424.7	828.6	203.1	8.4	6.9	1806	7.9	56	192	2651.2	2560	104.42	3.2	3793	8.1	1.45	12872	36.1	51241	55.2	16.3	43.14	13.45	2.58	437.07	529.16	72.29	70.19	155	0.3	1.29	12.725	Gansu	0.27	0.33
Gansu	2011	88.09	0.27	0.34	5.13	2.79	14988.7	3909.4	874.1	339.3	7.8	9.3	2041	7.7	57	181	2550	2564	108.18	3.1	3824	9.76	1.5	17425	37.2	59232	62.39	23.62	49.43	14.4	3.42	462.58	621.34	79.64	85.68	138	0.42	1.41	12.24	Gansu	0.27	0.34
Gansu	2012	75.7	0.24	0.31	6.47	3.14	17156.9	4506.7	1049.7	398	8.2	9.6	2145	7.5	57	231.2	2600.2	2578	106.01	2.7	4369	10.04	1.67	21978	38.8	62813	57.25	20.76	44.39	12.14	3.93	509.66	705.05	88.24	87.86	136	0.54	1.48	11.97	Gansu	0.24	0.31
Gansu	2013	69.26	0.21	0.28	6.24	3.41	18964.8	5107.8	1117.4	513.3	8	10.6	2193	8.3	53	255.5	2600.9	2582	105.64	2.3	3916	10.36	1.65	24296	40.1	64969	56.2	22.66	48.06	13.36	4.75333	556.74	788.76	96.84	90.04	153	0.626667	2.15333	10.44	Gansu	0.21	0.28
Gansu	2014	64.45	0.18	0.26	6.54	3.6	21803.9	6276.6	1048.2	546.2	6.6	8.9	2194	7.7	59	355.6	2492.8	2591	107.6	2.2	3682	9.67	1.84	26427	41.7	65973	57.56	34.58	51.73	14.58	5.57667	603.82	872.47	105.44	92.22	126	0.713333	2.82667	39.93	Gansu	0.18	0.26
Gansu	2015	54.92	0.14		6.83	3.72	23767.1	6936.2	1583.4	821.3	8	9.8	2189	8.3	57	191	2511.5	2600	106.18	2.1	4049	9	1.9	26165	43.2	67072	57.06	29.54	55.4	15.8	6.4	650.9	956.18	114.04	94.4	120	0.8	3.5	11.31	Gansu	0.14	0.24
Gansu	2016	128.7	0.29		7.25	3.82	25693.5	7456.9	1583.4	821.3	8.1	11	2189	8.2	56	310	2734.5	2610	102.85	2.2	4076	9.16	2.02	27457.7	44.7	66325	27.2	18.03	60	15.6	5.7	697.98	1039.89	122.64	96.58	132	0.9	3.7	8.7	Gansu	0.29	0.22
Gansu	2017	56.54	0.2		7.82	4.17	27763.4	8076.1	1741.2	890.6	8.4	11.1	2217	8	57	303	2439.2	2626	103.27	2.7	4066	10.52	2.14	29326	46.4	64514	25.88	17.71	55.2	14.7	5.9	745.06	1123.6	131.24	98.76	111	0.9	3.8	9.17	Gansu	0.2	0.2
Gansu	2018	38.71	0.19		8.74	4.59	29957	8804.1	2207.4	1132.6	9.8	12.5	2258	7.9	60	426.8	2433.8	2637	103.65	2.8	3237	11.87	2.26	31336	47.7	62703	24.56	17.39	63.4	17.3	5.9	792.14	1207.31	139.84	100.94	103	1	4	10.35	Gansu	0.19	0.18
Fujian	2002	55.19	0.05	0.16	2.56	1.5	9189.4	3538.8	323.2	118.7	4.9	4.6	569	20.9	75	1408.4	1489	3466	108.42	4.2	555	7.8	1.28	13510	53.6	136933	19.3	8.4	112.88	18.26	3.54	245.76	609.48	545.76	65.4	86	12.58	5.34	13.67	Fujian	0.05	0.16
Fujian	2003	68.94	0.17	0.39	2.73	1.44	9999.5	3733.9	348.8	128.9	4.7	4.7	738	20.9	71	776.6	1902	3488	104.61	4.1	1025	9.43	1.18	15006	52.2	164622	30.4	10.4	99.92	16.51	3.55	271.53	662.66	581.56	71.91	80	13.3	5.14	13.55	Fujian	0.17	0.39
Fujian	2004	80.89	0.17	0.14	1.44	0.73	11175.4	4089.4	476.8	136.4	5.8	4.5	1186	20.8	67	994.6	1968.8	3511	100.81	4	1026	10.46	1.24	17218	50.8	192968	32.6	11	96.62	15.71	3.46	292.84	743.21	588.42	76.03	74	13.44	4.97	15.25	Fujian	0.17	0.14
Fujian	2005	97.83	0.39	0.26	2.87	1.44	12321.3	4450.4	478.4	154	5.4	4.7	1427	20.3	69	1705.4	1469.2	3535	101.11	4	1000	12.08	1.25	18613	49.4	212392	46.1	13.1	90.48	18.88	3.4	335	794.17	623.46	80.78	72	14.27	6.16	12.92	Fujian	0.39	0.26
Fujian	2006	85.87	0.42	0.29	3.02	1.51	13753.3	4834.8	513.6	162.3	5.2	4.5	1656	20.8	72	1904.7	1564.3	3585	102.03	3.9	2057	9.04	1.28	21125	48	216024	46.9	14.6	89.98	19.11	3.62	352.93	772.8	670.33	76.01	72	14.27	6.15	11.31	Fujian	0.42	0.29
Fujian	2007	83.74	0.39	0.23	2.77	1.49	15505.4	5467.1	502.4	174.1	4.5	4.3	1656	21	68.3	1109.6	1543.8	3612	101.05	3.9	2055	9.52	1.11	25662	48.7	226998	44.6	11.7	92.5	16.51	3.39	390.12	959.97	747.33	92.12	65	14.18	6.22	11.2	Fujian	0.39	0.23
Fujian	2008	86.98	0.32	0.18	3.05	1.65	17961.5	6196.1	540.6	197.9	4.3	4.2	1788	20.4	69	1484.8	1593.8	3639	101.24	3.9	2055	10.42	1.24	30123	49.9	236269	42.9	11.7	93.85	14.88	3.84	423.27	1116.29	859.07	99.3	71	14.66	7	10.38	Fujian	0.32	0.18
Fujian	2009	68.01	0.69	0.43	3.64	1.78	19576.8	6680.2	591.5	219	4.4	4.4	2039	20.7	70	1374.7	1605.6	3666	99.99	3.9	2193	11.51	1.57	33051	51.4	246013	42	11.4	91.16	16.78	4.04	459.32	1115.31	953.96	105.63	64	15.78	7.18	8.47	Fujian	0.69	0.43
Fujian	2010	58.93	0.48	0.37	5.05	2.23	21781.3	7402.9	617.4	251.4	4.2	4.6	2039	20.4	74	1604.5	1485.6	3693	105.96	3.8	2290	10.32	1.66	33840	57.1	238502	40.9	13.9	90.42	17.08	4.09	543.68	1152.92	999.62	112.4	73	15.06	7.54	6.445	Fujian	0.48	0.37
Fujian	2011	52.58	0.56	0.42	5.96	2.63	24907.4	8778.6	773.3	321.2	4.6	4.9	2200	20.2	70	1244.9	1394.8	3720	97.37	3.7	2306	11.86	1.76	43301.5	58.1	316178	38.92	22.53	86.3	18.98	5.07	534.17	1348.75	1029.64	125.83	69	16.81	8.06	4.42	Fujian	0.56	0.42
Fujian	2012	50.62	0.71	0.54	6.53	2.96	28055.2	9967.2	773.2	380.6	4.2	5.1	2301	20.2	75	1913.4	1291.3	3748	101.89	3.6	2388	12.16	1.78	52763	59.6	256263	37.13	25.26	83.98	19.57	5.32	629.91	1484.76	1219.95	131.03	60	17.42	7.87	4.62	Fujian	0.71	0.54
Fujian	2013	47.22	0.45	0.34	7.21	3.26	30816.4	11184.2	935.5	481.7	4.7	5.9	2435	20.4	72	1137.5	1578.4	3774	107.89	3.6	2570	12.65	2	57856	60.8	259098	36.1	25.94	85.12	23.0133	5.98	725.65	1620.77	1410.26	136.23	64	18.3133	9.31333	5.06	Fujian	0.45	0.34
Fujian	2014	47.19	0.44	0.34	7.39	3.36	30722.4	12650.2	1059	735.9	4.8	6.7	2508	20.8	72	1628	1591.7	3806	108.56	3.5	2627	13.33	1.98	63472	61.8	260579	35.6	36.79	86.26	26.4567	6.64	821.39	1756.78	1600.57	141.43	65	19.2067	10.7567	5.54	Fujian	0.44	0.34
Fujian	2015	44.82	0.41		7.06	3.61	33275.3	13792.7	1178.5	866.9	5	6.9	2438	20.7	76	1778.2	1319	3839	105.71	3.7	2704	14.44	2	67966	62.6	256868	33.79	34.17	87.4	29.9	7.3	917.13	1892.79	1790.88	146.63	56	20.1	12.2	6.65	Fujian	0.41	0.34
Fujian	2016	42.74	0.16		6.94	3.58	36014.3	14999.2	1178.5	866.9	4.7	6.7	2438	21	77	2263.4	1287.2	3874	103.8	3.9	2758	15.26	2.06	73950.9	63.6	237016	18.93	23.79	92.1	30.5	8	1012.87	2028.8	1981.19	151.83	51	21.9	13.6	6.14	Fujian	0.16	0.34
Fujian	2017	42.79	0.33		6.98	3.67	39001.4	16334.8	1235.1	906.5	4.8	6.5	2352	21.2	73	1478	1632.4	3911	104.12	3.9	2854	15.85	2.15	82976	64.8	238279	13.39	17.02	90.6	30.9	8	1108.61	2164.81	2171.5	157.03	51	21.3	13.6	5.6	Fujian	0.33	0.34
Fujian	2018	45.24	0.3		7.25	3.85	42121.3	17821.2	1374.8	1015.8	4.9	6.8	2355	20.9	73	1399.6	1487.9	3941	108.41	3.7	3238	15.28	2.31	91197	65.8	239542	7.85	10.25	98.1	34.8	8.4	1204.35	2300.82	2361.81	162.23	48	20.7	12.8	6.72	Fujian	0.3	0.34
Tibet	2002	75.07	0.14	0.26	6.13	1.85	8079.1	1462.3	249.5	33	3.6	3.3	316	8.5	40	535.5	2309	267	92.84	4.9	1125	18.1	0.23	5983	-1	1543	0.1	0.1	24.01	12.05	0.61	312.84	604.68	59.28	45.36	78	0.01	0.03	10.31	Tibet	0.14	0.26
Tibet	2003	99.17	0.31	0.55	5.88	1.88	8765.5	1691	310.4	21.3	3.9	2.1	386	8.7	42	547.5	2953	270	92.25		1137	26	1.59	6874	6.3	1079	0.1	0.09	15.27	11.31	0.41	404.27	685.55	88.98	59	65	0.01	0.02	8.4	Tibet	0.31	0.55
Tibet	2004	74.32	0.17	0.32	0.56	1.7	9167.4	1861.3	320.7	28.9	3.8	2	550	8.6	41	555.2	2940.3	274	95.14	4	1137	26	1.59	7779	13.6	4501	0.1	0.2	14.51	10.62	0.43	447.17	722.97	105.63	54.88	52	0.01	0.03	12.28	Tibet	0.17	0.32
Tibet	2005	100.11	0.34	0.47	5.52	2.04	9431.2	2077.9	338.6	44.4	3.9	2.6	1139	9.3	42	495.8	3100	277	98.01		1257	14.88	1.66	9074	20.9	4555	0.2	0.2	23.03	54.88	0.64	470.82	767.82	124.5	58.99	70	0.01	0.04	11.65	Tibet	0.34	0.47
Tibet	2006	91.17	0.33	0.55	5.63	2.3	8941.1	2435	221.7	54.4	3.6	2.7	1014	9.7	35	339.3	3137.2	285	95.76		1146	15.47	1.51	10396	28.2	3252	0.2	0.1	24.23	18.57	0.42	311.35	722.54	41.34	38.38	62	0.01	0.05	9.7	Tibet	0.33	0.55
Tibet	2007	90.54	0.32	0.52	5.27	2.06	11130.9	2788.2	272.8	50	3.6	2.3	1014	9.8	33.8	477.3	3181	289	96.4		1258	16.73	1.33	12109	28.3	3335	0.2	0.1	27.21	17.17	0.76	465.89	955.72	46.55	48.92	57	0.01	0.06	8	Tibet	0.32	0.52
Tibet	2008	66.55	0.23	0.38	7.14	2.44	12481.5	3175.8	317.1	53.8	3.8	2.4	1174	8.9	38	533.8	2927	292	94.65		1557	12.76	1.56	13861	22.6	3420	0.2	0.1	20.57	16.38	0.78	491.6	1052.17	54.34	45.63	51	0.01	0.07	7.8	Tibet	0.23	0.38
Tibet	2009	118.3	0.28	0.46	5.55	2.45	13544.4	3531.7	352.3	71.5	3.9	3	1317	10.3	31	344	3245.2	296	96.6	3.8	1574	12.6	1.57	15295	23.8	3456	0.2	0.3	16.35	15.27	0.73	534.95	1082.3	54.91	47.85	50	0.01	0.07	7.13	Tibet	0.28	0.46
Tibet	2010	118.34	0.25	0.44	8.39	2.51	14980.5	4138.7	385.6	71.2	4	2.7	1317	10	33	359.8	3134.2	300	105.69	4	575	20.91	1.52	15295	22.7	3825	0.4	0.3	17.56	15.61	0.89	566.63	1084.98	51.08	53.89	48	0.01	0.04	6.055	Tibet	0.25	0.44
Tibet	2011	123.03	0.3	0.51	9.27	2.77	16195.6	4904.3	424.1	65.8	4.1	2.4	1446	9.4	34	425.4	3147.1	303	104.43	3.2	515	9.02	1.38	19026	22.7	4635	0.42	1	13.88	18.36	0.51	600.81	1124.98	41.45	48.67	40	0.01	0.02	4.98	Tibet	0.3	0.51
Tibet	2012	135.18	0.24	0.41	6.39	2.45	18028.3	5719.4	467.2	82.7	4.2	2.8	1508	9.6	34	365.2	3162.9	308	98.72	2.6	1655	8.59	1.31	22757	22.8	4683	0.42	0.66	14.03	20.95	0.56	682.52	1204.78	50.96	41.05	49	0.01	0.02	5.27	Tibet	0.24	0.41
Tibet	2013	138.12	0.24	0.42	10.32	3	20023.4	6578.2	618	71.5	5.1	2	1528	8.9	38	565.2	3046.8	312	103.23	2.5	1820	7.7	1.63	26068	23.7	5005	0.42	0.68	13.82	27.8667	1.00667	764.23	1284.58	60.47	33.43	64	0.01	0.04	4.81	Tibet	0.24	0.42
Tibet	2014	147.99	0.15	0.27	10.56	3.21	22015.8	7359.2	552.5	91.6	3.5	1.9	1766	9.4	36	637.8	3053.5	318	101.07	2.5	1857	8.43	1.76	29252	25.8	5450	0.42	1.39	13.61	34.7833	1.45333	845.94	1364.38	69.98	25.81	59	0.01	0.06	11.11	Tibet	0.15	0.27
Tibet	2015	140.2	0.15		10.94	3.25	25456.6	8243.7	585.3	152.6	3.1	2.4	1765	9.5	34	340	3112.4	324	102.33	2.5	1750	9.05	1.9	31999	27.7	5883	0.54	1.71	13.4	41.7	1.9	927.65	1444.18	79.49	18.19	59	0.01	0.08	37.33	Tibet	0.15	0.12
Tibet	2016	56.3	0.28		10.65	3.01	27802.4	9093.8	585.3	152.6	3	2.5	1765	9.5	37	551.6	3020.1	331	102.18	2.6	2624	6.2	1.98	35143.1	29.6	6143	0.54	1.65	16	41	1.7	1009.36	1523.98	89	10.57	80	0.01	0.1	41.12	Tibet	0.28	-0.0299999
Tibet	2017	154.77	0.16		8.91	3.24	30671.1	10330.2	639.7	147.5	3	2.2	1678	9.8	36	550.6	3070.3	337	100.85	2.7	1232	10.43	2.26	39259	30.9	7176	0.35	0.66	17.7	23	2	1091.07	1603.78	98.51	2.95	54	0.01	0.1	34.96	Tibet	0.16	-0.18
Tibet	2018	166.66	0.21		7.01	3.48	33797.4	11449.8	871.1	314.9	3.8	4.2	1616	9.3	38	534.4	3054.5	344	98.98	2.8	1750	7.72	2.42	43397	31.1	8209	0.16	-0.33	27.1	20.8	2	1172.78	1683.58	108.02	-4.66999	55	0.01	0.4	35.23	Tibet	0.21	-0.33
Guizhou	2002	35.23	0.07	0.1	3.27	0.91	5944.1	1489.9	265.3	32.4	5.8	2.8	320	14.6	78	1132.3	1086	3837	107.12	4.1	1096	8.3	2.04	3140	25.1	53254	132.5	42.8	126.01	27.99	1.22	195.48	431.16	41.64	40.56	125	0.32	1.14	9.45	Guizhou	0.07	0.1
Guizhou	2003	43.7	0.05	0.05	3.28	0.89	6569.2	1564.7	291.8	46.6	5.9	3.9	386	14.8	78	924.8	915	3870	107.63	4	1037	8.92	0.95	3601	25.7	55542	132.3	39.1	130.67	28.01	1.2	211.95	450.8	43.5	43.65	104	0.33	1.18	8.85	Guizhou	0.05	0.05
Guizhou	2004	122.23	0.11	0.15	0.84	0.68	7322.1	1721.6	301.3	47.2	5.5	3.6	745	14.6	76	1048.3	989	3904	107.48	4.1	1080	8.24	1.94	4215	26.3	55687	131.5	32.2	136.27	27.75	1.22	227.65	540.59	45.89	50.89	83	0.35	1.36	8.09	Guizhou	0.11	0.15
Guizhou	2005	147.96	0.32	0.32	3.3	0.9	8151.1	1877	403.4	71.8	6.5	4.6	838	14.1	79	1067.5	1004.1	3730	106.13	4.2	907	8.63	1.1	5222	26.9	55668	135.8	36.4	135.51	30.55	1.28	240.75	565.08	49.89	54.49	76	0.36	1.69	8.64	Guizhou	0.32	0.32
Guizhou	2006	146.21	0.36	0.4	3.5	0.95	9116.6	1984.6	329.8	76.8	4.8	4.7	910	14.8	79	1016.9	1052.3	3690	106.99	4.1	3045	5.81	1.12	5750	27.5	55382	146.5	26.3	134.44	29.21	1.14	262.8	536.59	53.51	52.25	83	0.49	1.8	6.01	Guizhou	0.36	0.4
Guizhou	2007	169.92	0.68	0.75	3.81	1.16	10678.4	2796.9	354.5	79.3	4.6	4.1	910	14.9	75.1	884.9	1014.8	3632	107.12	4	3094	8.04	1.04	6835	28.2	55112	137.5	29.5	130.6	26.24	1.25	318.56	734.09	59.21	61.46	85	0.48	1.96	5.82	Guizhou	0.68	0.75
Guizhou	2008	182.99	0.35	0.53	4.05	1.22	11758.8	2796	471.4	96.4	5.6	4.5	904	14.1	77	1370.9	865.2	3596	108.21	4	3172	8.28	0.96	8824	29.1	55866	123.6	32.7	133.36	25.18	1.72	378.46	927.81	66.49	63.81	82	0.36	2.25	5.61	Guizhou	0.35	0.53
Guizhou	2009	159.59	0.87	0.74	4.37	1.5	12862.5	3005.4	535.4	133.2	5.9	5.5	1043	14.9	74	849.5	934.6	3537	107.03	3.8	3217	8.28	1.01	10258	29.9	59160	117.5	44	126.1	26.19	1.66	420.85	874.5	74.64	64.84	74	0.41	2.04	5.06	Guizhou	0.87	0.74
Guizhou	2010	129.14	0.86	0.73	5.31	1.91	14142.7	3471.9	546.8	178.1	5.4	6.2	1043	14.6	77	1010	1021.5	3479	106.89	3.6	3266	8.46	1.04	10309	33.8	60823	114.9	25.2	116.74	25.51	1.81	457.11	880.8	81.01	65.76	75	0.38	1.98	4.565	Guizhou	0.86	0.73
Guizhou	2011	133.48	1	0.81	6.24	2.25	16495	4145.4	578.3	246.3	5.1	7.1	1254	14	78	735.2	804	3469	112.01	3.6	3502	8.7	1.07	14937.5	35	77927	110.43	30.35	110.42	23.3	1.93	513.14	1082.74	86.94	75.36	79	0.43	2.1	4.07	Guizhou	1	0.81
Guizhou	2012	131.29	1.22	0.9	6.96	2.74	18700.5	4753	654.5	282.5	5.2	7.2	1392	13.7	85	1226.4	681.6	3484	105.66	3.3	3324	8.8	1.41	19566	36.4	91455	104.11	29.45	97.43	21.19	2.35	558.19	1147.14	99.05	79.12	73	0.53	2.05	3.75	Guizhou	1.22	0.9
Guizhou	2013	134.28	0.68	0.49	6.96	3.26	20667.1	5434	633.7	302.3	4.6	6.4	1535	15.1	79	888.3	1230.7	3502	107.05	3.3	3406	9.6	1.31	22922	37.8	93085	98.64	30.13	95.72	25.1267	2.73333	603.24	1211.54	111.16	82.88	85	0.72	2.56667	3.42	Guizhou	0.68	0.49
Guizhou	2014	129.39	0.61	0.41	10.06	3.44	22548.2	6671.2	927.4	373	6.1	6.2	1819	14.7	83	1562	956	3508	104.68	3.3	2393	10.61	1.65	26393	40	110912	92.58	37.79	94.01	29.0633	3.11667	648.29	1275.94	123.27	86.64	74	0.91	3.08333	5.12	Guizhou	0.61	0.41
Guizhou	2015	133.46	0.28		11.16	3.56	24579.6	7386.9	1050.1	527.8	5.2	6.8	2005	15.2	84	1430.8	942.3	3530	107.12	3.3	2396	11.27	1.8	29847	42	112803	85.3	28.56	92.3	33	3.5	693.34	1340.34	135.38	90.4	61	1.1	3.6	13.01	Guizhou	0.28	0.33
Guizhou	2016	55.47	0.11		11.88	3.69	26742.6	8090.3	1050.1	527.8	5.5	7	2005	15.3	80	1045.8	1160.2	3555	106.65	3.2	2182	11.36	1.94	33127.1	44.2	100720	64.71	20.43	86.1	29.4	3.3	738.39	1404.74	147.49	94.16	64	1.2	3.6	11.86	Guizhou	0.11	0.25
Guizhou	2017	122.15	0.69		14.41	3.96	29079.8	8869.1	1244	602.5	6.1	7.3	2129	15.2	80	1165.9	1100.7	3580	107.23	3.2	2302	11.02	2.11	37956	46	118017	68.75	19.68	81.3	28.4	3.2	783.44	1469.14	159.6	97.92	53	1.2	3.4	10.11	Guizhou	0.69	0.17
Guizhou	2018	114.06	0.53		8.6	4.55	31591.9	9716.1	1657.8	703.2	8	7.7	2254	14.8	80	1257.1	1059.7	3600	109.37	3.2	2412	10.96	2.26	41244	47.5	135314	72.79	18.93	72.4	30.6	2.5	828.49	1533.54	171.71	101.68	57	1.3	3.2	9.93	Guizhou	0.53	0.0899999
Liaoning	2002	27.72	0.08	0.23	4.59	1.88	6524.5	2751.3	462.8	115.8	8.7	6.5	1072	9.2	55	679.2	2119	4203	101.94	6.5	1246	7.8	4	13000	57.8	189218	79.3	63.6	199.4	15.09	8.84	212.88	386.04	173.4	73.68	133	4.64	1.67	5.16	Liaoning	0.08	0.23
Liaoning	2003	39.23	0.07	0.13	4.62	1.84	7240.6	2934.4	534.3	132.6	8.8	7	1221	9	58	643	1996	4210	100.05	6.5	1244	8.18	2.21	14258	58.1	191841	82.3	58.8	178.59	16.45	9.59	288.17	420.19	189.75	82.87	135	4.49	2.51	4.74	Liaoning	0.07	0.13
Liaoning	2004	55.16	0.17	0.18	3.31	0.54	8007.6	3307.1	541.3	145.2	8.3	7	1855	9.6	57	705.2	2291.7	4217	100.62	6.5	1256	8.64	2.19	16297	58.4	195257	83.1	57.9	173.72	17.18	9.77	304.84	461.95	206.05	92.83	137	4.71	1.99	4.36	Liaoning	0.17	0.18
Liaoning	2005	55.12	0.24	0.22	4.67	1.88	9107.6	3690.2	751.2	233.5	10.2	8.3	2141	8	64	822.2	2249.9	4221	100.53	5.6	1243	8.94	2.17	19022	58.7	218705	119.7	74.5	173.58	17.86	8.58	329.41	480.07	224.24	93.81	118	5.74	2.08	4.77	Liaoning	0.24	0.22
Liaoning	2006	56.2	0.18	0.21	4.74	1.93	10369.6	4090.4	767.1	267.9	9.6	8.7	2379	8.3	68	576.3	2219.4	4271	102.02	5.1	2271	9.28	2.21	21802	59	212953	125.9	71.4	171.78	19.21	9.35	348.55	474.51	255.51	89.04	117	6.18	1.77	4.12	Liaoning	0.18	0.21
Liaoning	2007	56.95	0.17	0.21	4.73	1.92	12300.4	4773.4	879.1	265	9.3	7.9	2379	9	67.7	672.3	2360.9	4298	101.22	4.3	1945	10.02	2.11	25725	59.2	220997	123.4	71.6	168.25	16.02	8.87	357.19	580.09	271.74	110.58	119	5.8	2.58	3.76	Liaoning	0.17	0.21
Liaoning	2008	60.41	0.14	0.16	4.7	2.01	14392.7	5576.5	913.1	283.4	8.1	7.4	2498	8.6	64	721.7	2570.7	4315	100.92	3.9	1916	10.58	2.14	31259	60.1	212021	113.1	69.3	162.79	16.65	10.96	462.19	774.3	318.38	120.53	118	5.5	2.68	3.48	Liaoning	0.14	0.16
Liaoning	2009	58.95	0.1	0.13	4.89	2.11	15761.4	5958	1018.4	409.6	8.3	9.6	2659	7.7	67	657.7	2660.1	4341	101.36	3.9	1922	10.34	2.25	34898	60.4	217155	105.1	61.2	167.92	18.52	10.23	478.97	765.02	350.23	121.67	110	5.2	2.36	3.2	Liaoning	0.1	0.13
Liaoning	2010	60.1	0.08	0.12	6.56	2.72	17712.6	6907.9	1079.8	413.8	8.1	9.2	2659	7.2	71	1036.6	2275.2	4375	102.54	3.6	1814	9.35	2.28	35239	62.1	218189	102.2	63.3	150.33	16.43	8.72	499.4	738.95	364.23	104.74	101	4.85	2.01	2.74	Liaoning	0.08	0.12
Liaoning	2011	68.89	0.07	0.1	7.49	3.13	20466.8	8296.5	1208.3	482.9	8.2	8.9	2712	7.7	68	479.7	2619	4383	101.32	3.7	1712	11.03	2.3	45893	64.1	232247	112.62	69.32	111.75	14.94	8.31	515.76	873.02	403.53	130.71	96	5.19	1.5	2.28	Liaoning	0.07	0.1
Liaoning	2012	70.52	0.07	0.11	7.97	3.38	23222.7	9383.7	1309.6	548.8	7.9	9.1	2811	7.4	69	786	2577.2	4389	100.53	3.6	1624	11.11	2.3	56547	65.7	238769	105.87	72.63	103.09	15.88	8.48	581.9	979.75	474.35	131.32	92	5.21	1.48	2.24	Liaoning	0.07	0.11
Liaoning	2013	59.65	0.05	0.09	6.99	4.22	25578.2	10522.7	1343	789.5	7.4	11	2903	7.9	68	788.1	2389.6	4390	101.97	3.4	1663	11.19	2.44	61686	66.5	234508	102.7	67.06	108.76	17.1533	8.72	648.04	1086.48	545.17	131.93	129	5.47333	1.88667	1.79	Liaoning	0.05	0.09
Liaoning	2014	57.01	0.06	0.11	8.73	3.78	29081.7	11191.5	1630.8	1026.4	7.9	13.2	2876	9.2	59	362.9	2690	4391	102.74	3.4	1615	11.79	2.31	65201	67.1	262879	99.46	112.07	114.43	18.4267	8.96	714.18	1193.21	615.99	132.54	124	5.73667	2.29333	1.78	Liaoning	0.06	0.11
Liaoning	2015	53.72	0.08		9.15	3.94	31125.7	12056.9	2313.6	1139.2	8.2	12	2845	9	62	573.2	2412.8	4382	100.45	3.4	1590	12.3	2.4	65524	67.4	260045	96.88	100	120.1	19.7	9.2	780.32	1299.94	686.81	133.15	115	6	2.7	1.91	Liaoning	0.08	0.13
Liaoning	2016	51.4	0.16		9.95	4.07	32876.1	12880.7	2313.6	1139.2	9.3	11.4	2845	8.8	63	968	2422.1	4378	101.86	3.8	1485	12.91	2.51	50313.6	67.4	228202	50.77	64.91	110.9	21.4	10.2	846.46	1406.67	757.63	133.76	94	7.1	3.4	1.69	Liaoning	0.16	0.15
Liaoning	2017	54.08	0.13		11.12	4.02	34993.4	13746.8	2380.1	1251.4	9.4	11.6	2859	9.3	59	463.8	2556.3	4369	100.12	3.8	1770	13.23	2.65	54745	67.5	237971	38.97	55.75	96.4	22.3	10.3	912.6	1513.4	828.45	134.37	85	7	3.4	1.54	Liaoning	0.13	0.17
Liaoning	2018	55.81	0.18		10.45	4.86	37341.9	14656.3	2626.9	1529.1	9.9	13.3	2866	8.8	59	482.2	2495.4	4359	100.37	3.9	1782	11.72	2.76	58008	68.1	247740	27.17	46.59	91.7	24.6	8.7	978.74	1620.13	899.27	134.98	72	6.8	3.1	1.55	Liaoning	0.18	0.19
Chongqing	2002	51.05	0.12	0.24	2.62	1.2	7238	2097.6	429.6	75.9	6.8	5.1	644	18.7	79	1429	1114	3107	104.36	4.1	1283	4.4	2.24	6353	40.7	126266	70	18.8	157.28	25.82	4.6	239.88	574.08	97.68	65.4	152	1.83	2.33	10.31	Chongqing	0.12	0.24
Chongqing	2003	61.14	0.07	0.11	2.71	1.19	8093.7	2214.6	459.1	89.4	6.4	5.6	768	18.8	76	1065.7	888	3130	103.56	4.1	1057	6.16	1.16	8075	42.2	133961	76.6	21.1	154.7	28.06	3.98	255.26	616.57	110.75	71.53	147	1.93	2.21	8.4	Chongqing	0.07	0.11
Chongqing	2004	85.04	0.09	0.12	1.29	0.64	9221	2510.4	538	115.3	6.7	6.2	1277	18.4	78	1182.1	974.7	3122	99.3	4.1	1088	7.71	1.17	9608	43.7	135518	79.5	20.4	166.85	27.95	6.1	297.99	662.34	122.1	78.08	142	2.17	2.78	12.28	Chongqing	0.09	0.12
Chongqing	2005	134.22	0.29	0.33	2.73	1.21	10243.5	2809.3	629.3	142.6	7.3	6.7	1474	18.6	78	1019.8	903.9	2798	101.57	4.1	1093	8.7	1.33	11002	45.2	145221	83.7	21.6	152.33	30.29	6.53	308.14	692.58	122.24	73.37	120	2.3	3.82	11.65	Chongqing	0.29	0.33
Chongqing	2006	124.67	0.33	0.31	2.84	1.29	11569.7	2873.8	705.7	159.7	7.5	7.2	1906	19.2	75	839.6	1097.1	2808	102.56	4	1474	9.29	1.34	12437	46.7	150613	86	21.3	144.67	30.39	6.87	339.16	634.93	135.89	73.73	111	2.39	3.34	9.7	Chongqing	0.33	0.31
Chongqing	2007	125.16	0.41	0.34	3.09	1.39	12590.8	3509.3	749.5	168.6	7.6	6.7	1906	19	81.1	1439.2	856.2	2816	102.56	4	1527	9.64	1.37	14622	48.3	134241	82.6	19.8	144.41	27.65	5.77	360.84	848.81	135.13	85.78	108	3.13	3.45	8	Chongqing	0.41	0.34
Chongqing	2008	127.61	0.24	0.18	3.26	1.62	14367.6	4126.2	878.3	197.2	7.9	6.8	2043	18.5	82	962.7	703.8	2839	101.67	4	1574	9.56	1.21	18025	50	145113	78.2	18.4	135.37	25.44	6.16	425.45	1205.28	171.07	94.42	106	2.85	4.22	7.8	Chongqing	0.24	0.18
Chongqing	2009	96.9	0.43	0.39	3.57	1.84	15748.7	4478.4	982.7	242.6	8.1	7.7	2317	19	80	1198.9	943.9	2859	100.66	4	1637	7.85	1.36	22916	51.6	147069	74.6	19.1	122.74	27.86	6.31	509.1	1094.97	181.52	97.25	105	3.36	4.09	7.13	Chongqing	0.43	0.39
Chongqing	2010	89.9	0.22	0.25	3	2.84	17532.4	5276.7	1021.5	270.3	7.7	7.5	2317	18.6	78	1044.7	910.6	2885	102.43	3.9	1860	7.23	1.45	22920	53	128113	71.9	20.8	126.44	28.86	7.12	559.89	1142.96	190.51	101.66	102	3.46	4.71	6.055	Chongqing	0.22	0.25
Chongqing	2011	88.82	0.29	0.32	3.78	3.19	20249.7	6480.4	1050.6	375.3	7	8.3	2522	18.8	70	837.8	1150	2919	104.03	3.5	1830	8.8	1.49	31001.5	55	131450	58.69	18.1	137.65	23.83	5.48	624.99	1427.15	200.42	117.26	93	3.65	4.09	4.98	Chongqing	0.29	0.32
Chongqing	2012	85.57	0.21	0.28	4.09	3.71	22968.1	7383.3	1101.6	482.2	6.6	9.6	2734	18.3	72	1104.4	812	2945	101.37	3.3	1832	9	1.77	39083	57	132430	56.48	18.23	125.37	23.17	5.18	797.03	1591.79	266.13	135.26	90	3.57	3.67	5.27	Chongqing	0.21	0.28
Chongqing	2013	83.31	0.18	0.26	4.58	4.17	25216.1	8332	1245.3	535.9	7	9.2	2894	19.8	71	1026.9	1213.7	2970	103.96	3.4	1847	11.57	1.64	42795	58.3	142535	54.77	19.12	128.48	27.4467	6.88667	969.07	1756.43	331.84	153.26	106	4.74667	4.58	4.81	Chongqing	0.18	0.26
Chongqing	2014	76.62	0.21	0.33	5.71	3.9	25147.2	9489.8	1187.7	677	6.5	8.5	3071	18.6	79	1452.1	598.4	2991	105.88	3.5	1872	11.18	1.94	47859	59.6	145822	52.69	22.61	131.59	31.7233	8.59333	1141.11	1921.07	397.55	171.26	98	5.92333	5.49	5.12	Chongqing	0.21	0.33
Chongqing	2015	75	0.17		6.37	4.19	27238.8	10504.7	1700	852.3	7.1	8.3	3059	19.6	75	1448.7	1129.8	3017	100.6	3.6	1904	11.03	2	52330	60.9	149799	49.58	20.91	134.7	36	10.3	1313.15	2085.71	463.26	189.26	87	7.1	6.4	5.59	Chongqing	0.17	0.4
Chongqing	2016	65.66	0.31		6.87	4.49	29610	11548.8	1700	852.3	8.1	8.6	3059	19.5	76	1348	1228.4	3048	103.37	3.7	1953	10.7	2.12	57902.1	62.6	202061	28.83	9.58	142.2	35.9	10.1	1485.19	2250.35	528.97	207.26	77	7.2	7.4	4.02	Chongqing	0.31	0.47
Chongqing	2017	77.15	0.13		7.69	4.65	32193.2	12637.9	1882.5	883.9	8.3	8.1	3084	19.4	75	1245.5	1154.4	3075	99.57	3.4	2017	11.5	2.23	63689	64.1	200677	25.34	8.33	152.2	36.1	9.9	1657.23	2414.99	594.68	225.26	72	7.3	7.9	3.02	Chongqing	0.13	0.54
Chongqing	2018	73.37	0.05		7.47	5.41	34889.3	13781.2	2054.5	1075.1	8.5	9	3081	19.3	75	1185.7	1178.7	3102	100.35	3	2026	9.51	2.46	65933	65.5	199293	21.85	7.08	144.8	44	10.2	1829.27	2579.63	660.39	243.26	64	7.8	7.9	3.83	Chongqing	0.05	0.61
Shaanxi	2002	36.68	0.19	0.38	4.55	1.68	6330.8	1596.3	444.2	103.1	8.3	6.9	1120	15.4	61	406	1905	3674	105.77	3.3	1349	6.5	2.97	5523	31.5	67010	63.8	32.7	53.65	6.64	2.06	165.96	254.28	48.6	46.44	130	0.27	0.34	13.55	Shaanxi	0.19	0.38
Shaanxi	2003	52.18	0.44	0.76	4.22	1.79	6806.4	1675.7	491.2	106.7	8.7	7.3	1352	14.3	67	882.8	1657	3690	105.2	3.5	2217	7.36	1.63	6480	33.4	70765	76.6	34.6	50.69	6.63	2.29	184.89	259.99	45.72	46.74	136	0.29	0.32	11.73	Shaanxi	0.44	0.76
Shaanxi	2004	91.47	0.07	0.1	1.52	1.1	7492.5	1866.5	513.3	118.1	8.2	7.3	2114	15.4	59	512.7	1913.1	3705	105.88	3.8	2247	7.91	1.61	7757	35.3	75810	81.8	37.5	54.88	6.55	2.06	199.92	298.84	48.77	51.74	142	0.29	0.36	11.53	Shaanxi	0.07	0.1
Shaanxi	2005	107.92	0.18	0.2	4.51	1.72	8272	2052.6	605.3	165.8	9.1	8.7	2349	15	60	541.4	1949.4	3720	102.01	4.2	2531	8.19	1.62	9908	37.2	83368	92.2	39.4	54.01	8.02	2.21	207.95	325.32	57.49	59.35	129	0.35	0.43	16.61	Shaanxi	0.18	0.2
Shaanxi	2006	87.12	0.15	0.2	4.62	1.83	9267.7	2260.2	612.3	195.6	8.1	9	2549	15.2	67	434	1991.4	3699	101.19	4	6307	9.1	1.64	11762	39.1	86565	98.1	34.5	57.47	7.78	2.61	235.08	323.42	58.47	52.66	133	0.35	0.42	12.56	Shaanxi	0.15	0.2
Shaanxi	2007	84.1	0.16	0.19	4.67	1.95	10763.3	2644.7	678.4	222.5	8.1	8.7	2549	15.6	57.7	698.5	1893.6	3708	101.55	4	5938	10.99	1.6	14350	40.6	99348	92.7	32.2	52.74	6.33	2.17	300.18	429.03	68.76	68.58	135	0.44	0.46	10.62	Shaanxi	0.16	0.19
Shaanxi	2008	87.25	0.22	0.25	4.74	2.16	12857.9	3136.5	862.7	251.2	8.8	8.4	2683	14.9	58	525.2	1803.7	3718	102.79	3.9	5488	12.13	1.53	18246	42.1	104883	88.9	27.5	51.56	6.57	2.33	337.75	504.29	74.88	70.67	113	0.41	0.56	10.24	Shaanxi	0.22	0.25
Shaanxi	2009	75.84	0.38	0.41	4.75	2.33	14128.2	3437.6	863.4	329.3	8.1	9.8	3045	15.1	70	660.3	1729	3727	102.58	3.9	5530	13.36	1.81	21732	43.5	111219	80.4	20.3	107.6	7.28	2.48	391.78	503.12	84.59	72.6	113	0.45	0.62	9.17	Shaanxi	0.38	0.41
Shaanxi	2010	67.91	0.11	0.12	4.9	2.65	15695.2	4105	935.4	376.2	7.9	9.9	3045	14.6	62	527.3	1948.6	3735	106.92	3.9	5506	12.64	1.7	21688	45.8	115673	77.9	16.3	52.56	7.75	2.64	443.78	533.01	86.7	79.56	126	0.42	0.55	8.19	Shaanxi	0.11	0.12
Shaanxi	2011	67.81	0.18	0.19	5.88	2.96	18245.2	5027.9	1100.5	533.4	8	11.9	3378	14.1	65	717.8	2040.3	3743	105.42	3.6	5821	15.59	1.68	30122.5	47.3	121815	91.68	46.34	52.7	7.8	3.52	481.61	642.23	94.89	96.75	118	0.55	0.74	7.21	Shaanxi	0.18	0.19
Shaanxi	2012	64.25	0.12	0.11	6.37	3.27	20733.9	5762.5	1212.4	619.9	7.9	12.1	3525	14.2	62	385.3	1922	3753	107.08	3.2	5483	15.58	1.85	38557	50	128749	84.38	46.21	48.54	7.56	3.91	538.9	716.92	116.03	98.47	118	0.53	0.86	6.85	Shaanxi	0.12	0.11
Shaanxi	2013	60.93	0.12	0.12	6.85	3.58	22858.4	6502.6	1310.2	776.4	7.9	13.6	3612	15.8	58	423.9	2190.5	3764	105.02	3.3	5541	16.27	1.88	42692	51.3	132169	80.62	53.77	53.9933	8.74	4.67333	596.19	791.61	137.17	100.19	189	0.62	1.04	6.67	Shaanxi	0.12	0.12
Shaanxi	2014	57.39	0.12	0.12	7.43	3.89	24365.8	7932.2	1495.9	883.7	8.5	12.2	3628	15.2	61	660.2	1941.8	3775	107.05	3.3	5474	15.85	2.03	46929	52.6	145785	78.1	70.91	59.4467	9.92	5.43667	653.48	866.3	158.31	101.91	152	0.71	1.22	8.23	Shaanxi	0.12	0.12
Shaanxi	2015	56.66	0.14		8.02	4.04	26420.2	8688.9	2016.7	1044.1	9.7	12.1	3540	15.2	62	551.6	1795.9	3793	102.59	3.4	4031	15.51	2.1	48023	53.9	168122	73.5	60.36	64.9	11.1	6.2	710.77	940.99	179.45	103.63	126	0.8	1.4	4.87	Shaanxi	0.14	0.12
Shaanxi	2016	58.13	0.1		8.03	4.37	28440.1	9396.4	2016.7	1044.1	10.4	12.2	3540	15.8	59	456	2140.3	3813	101.93	3.3	4240	16.01	2.25	50398	55.3	166565	31.8	28.74	66.8	10.3	5.1	768.06	1015.68	200.59	105.35	137	0.8	1.7	5.22	Shaanxi	0.1	0.12
Shaanxi	2017	59	0.12		8.71	4.55	30810.3	10264.5	2140.8	1260.4	10.5	13.5	3582	15.6	59	649.1	1966.1	3835	97.38	3.3	4101	15.63	2.43	57266	56.8	175955	27.94	23.67	64.4	10.8	5.7	825.35	1090.37	221.73	107.07	126	1	1.7	5.5	Shaanxi	0.12	0.12
Shaanxi	2018	55.9	0.32		8.21	4.97	33319.3	11212.8	2233.4	1241.8	10.2	12.3	3562	15.5	59	459.2	2055.8	3864	100.47	3.2	4450	13.72	2.56	63477	58.1	185345	24.08	18.6	68	13	5.4	882.64	1165.06	242.87	108.79	111	0.8	1.7	4.96	Shaanxi	0.32	0.12
Qinghai	2002	48.68	0.06	0.19	7.55	2.01	6170.5	1668.9	429.1	118	8.5	8.5	419	6.1	50	410.8	2256	529	105.28	3.6	1872	13.2	0.43	6424	39.3	11131	3.2	6.1	42.56	20.3	0.68	170.04	382.2	48.84	40.8	151	0.45	0.45	23.1	Qinghai	0.06	0.19
Qinghai	2003	58.17	0.12	0.23	7.56	1.96	6745.3	1794.1	451.3	115.7	8.4	7.4	489	6	53	564	2375	534	104.15	3.8	1930	13.73	1.7	7276	39.3	11310	6	6	53.93	30.44	0.77	184.21	385.55	51.58	41.73	139	0.53	0.55	21.5	Qinghai	0.12	0.23
Qinghai	2004	71.78	0	0	1.46	1.58	7319.7	1957.7	452	126.6	7.8	7.6	891	5.8	57	429.5	2389.8	539	105.44	3.9	1966	15.71	1.6	8606	39.3	14287	7.4	7.6	47.54	22.54	0.53	188.36	400.24	51.84	42.48	127	0.56	0.44	16.37	Qinghai	0	0
Qinghai	2005	94.03	0.15	0.23	7.5	1.81	8057.9	2151.5	554.1	152.3	8.9	7.7	905	5.8	58	484.1	2477.5	543	102.12	3.9	2001	17.84	1.56	10030	39.3	19360	12.4	7.7	43.63	20.77	0.54	195.48	439.53	59.47	47.41	114	0.35	0.56	20.07	Qinghai	0.15	0.23
Qinghai	2006	75.21	0.15	0.2	7.47	1.88	9000.4	2358.4	542.9	192.8	8.3	8.8	935	6.4	56	352.3	2417.1	548	103.15	3.9	2113	18.32	1.56	11753	39.3	19407	13	7.2	42.69	25.07	0.85	229.61	430.84	60.84	42.51	135	0.26	0.8	16.5	Qinghai	0.15	0.2
Qinghai	2007	88.41	0.17	0.24	6.93	1.9	10276.1	2683.8	613.2	229.3	8.2	9.4	935	6.1	57.1	523.1	2364.7	552	102.74	3.8	1962	18.73	1.58	13836	40.1	19948	13.4	7.5	42.6	23.41	0.73	260.09	523.1	68.56	56.59	115	0.3	1.01	16.13	Qinghai	0.17	0.24
Qinghai	2008	88.37	0.13	0.22	7.22	2.04	11640.4	3061.2	610	270.1	7.4	9.3	930	5.7	56	378.6	2538.6	554	101.61	3.8	2051	17.66	1.77	17389	40.9	19997	13.5	7.6	39.46	18.96	0.82	334.04	707.09	71.87	65.58	118	0.32	1.09	13.29	Qinghai	0.13	0.22
Qinghai	2009	92.75	0.17	0.29	8.03	2.13	12691.9	3346.2	701.4	291.3	8	9.1	1080	6.2	59	459.1	2460.7	557	101.21	3.8	2189	17.62	1.88	19454	41.9	22171	13.6	7.6	41.78	18.88	0.93	367.5	726.1	81.06	64.28	141	0.63	1.16	13.74	Qinghai	0.17	0.29
Qinghai	2010	87.35	0.14	0.25	9.53	2.3	13855	3862.7	718.8	307.9	7.5	8.2	1080	6.4	54	405	2782.1	563	107.4	3.8	2320	18.3	1.92	19454	44.7	22609	14.3	7.7	36.5	21.74	1.22	405.4	708.9	83.4	66.87	124	0.38	1.23	11.225	Qinghai	0.14	0.25
Qinghai	2011	92.99	0.1	0.2	11.34	2.74	15603.3	4608.5	854.3	308.1	7.8	6.8	1082	5.7	56	390.4	2547	568	102.61	3.8	2487	16.94	2.04	26238.5	46.2	21292	15.66	13.83	49.82	22.73	1.49	467.77	910.27	95.79	82.7	105	0.57	1.6	8.71	Qinghai	0.1	0.2
Qinghai	2012	112.1	0.11	0.24	27.42	2.86	17566.3	5364.4	906.1	520.1	7.3	9.7	1133	5.2	59	446.1	2655.2	573	106.35	3.4	2674	16.6	2.08	33023	47.4	21994	15.39	15.64	40.8	23.25	1.58	493.94	966.15	112.87	80.99	105	0.56	1.37	8.34	Qinghai	0.11	0.24
Qinghai	2013	105.64	0.12	0.28	14.02	3.45	19498.5	6196.4	813.1	676.7	6	11.2	1162	6.1	55	413.6	2660.6	578	103.85	3.3	2924	14.47	2.31	36510	48.5	21953	15.67	17.38	44.9667	22.7333	1.88667	520.11	1022.03	129.95	79.28	163	0.606667	1.81333	8.45	Qinghai	0.12	0.28
Qinghai	2014	101.16	0.12	0.24	15.01	3.88	22306.6	7282.7	1213	944.5	6.9	11.5	1275	5.7	59	446.5	2571.3	583	101.09	3.2	2604	14.4	2.22	39633	49.8	23001	15.43	23.99	49.1333	22.2167	2.19333	546.28	1077.91	147.03	77.57	121	0.653333	2.25667	5.69	Qinghai	0.12	0.24
Qinghai	2015	123.26	0.18		16.33	3.99	24542.3	7933.4	1750.4	1278.8	7.6	13.9	1319	6.4	55	306.2	2590.1	588	109.29	3.2	2692	13.25	2.3	41252	50.3	23663	15.08	24.6	53.3	21.7	2.5	572.45	1133.79	164.11	75.86	106	0.7	2.7	16.63	Qinghai	0.18	0.2
Qinghai	2016	40.04	1.32		16.19	3.94	26757.4	8664.4	1750.4	1278.8	8.4	13.9	1319	6.6	57	444.1	2690.4	593	105.8	3.1	2710	14.49	2.3	43531	51.6	27275	11.37	14.86	47.7	26.7	2.6	598.62	1189.67	181.19	74.15	113	0.7	2.5	13.45	Qinghai	1.32	0.16
Qinghai	2017	134.2	0.27		17.53	4.35	29168.9	9462.3	1948.6	1270.4	9.1	12.8	1391	6.3	57	464	2555.9	598	105.93	3.1	2777	14.37	2.59	44348	53.1	27115	9.24	12.95	45.1	24.9	2.9	624.79	1245.55	198.27	72.44	83	0.8	2.8	9.63	Qinghai	0.27	0.12
Qinghai	2018	140.33	0.13		11.09	4.92	31514.5	10393.3	2371.1	1332.3	10.3	12.9	1426	6.3	59	518.9	2380.2	603	108.34	3	2804	14.57	2.68	47689	54.5	26955	7.11	11.04	43.2	28.4	2.2	650.96	1301.43	215.35	70.73	91	0.6	2.5	10.24	Qinghai	0.13	0.08
Heilongjiang	2002	48.57	0.11	0.14	3.9	1.73	6100.6	2405.2	415.2	120.2	9.3	7.2	878	5.4	63	599.3	2169	3813	105.04	4.9	345	6.3	2.52	10235	51.9	116584	28.7	47.2	103.59	7.69	6.45	155.64	304.2	79.8	56.76	129	3.63	2.5	6.54	Heilongjiang	0.11	0.14
Heilongjiang	2003	68.25	0.15	0.19	3.86	1.64	6678.9	2508.9	456.3	135.2	9.1	8.1	1028	5.9	63	513.1	2089	3815	103.52	4.2	355	6.7	1.67	11623	52.3	118747	35.6	50.8	111.7	7.85	6.26	175.8	326.64	84.99	57.12	121	3.35	2.61	5.79	Heilongjiang	0.15	0.19
Heilongjiang	2004	103.37	0.17	0.12	2.31	0.67	7470.7	3005.2	537.4	131	9.7	7.1	1657	5.8	59	520.7	2363.4	3817	103.14	4.5	340	6.73	1.68	13897	52.7	114340	37.3	52.8	110.47	7.11	5.77	193.08	348.67	90.95	65.31	113	2.89	2.63	4.81	Heilongjiang	0.17	0.12
Heilongjiang	2005	125.45	0.72	0.35	3.87	1.67	8272.5	3221.3	613.2	253.5	9.9	10	1887	4.7	62	507.9	2134	3820	102.44	4.4	342	6.68	1.71	14467	53.1	114041	50.8	54.8	112.64	9.58	5.74	195.9	371.49	93.17	60.57	104	3.77	3.32	6.18	Heilongjiang	0.72	0.35
Heilongjiang	2006	109.35	0.87	0.45	3.96	1.7	9182.3	3552.4	634.3	253.8	9.5	9.7	2090	5.3	57	487.9	2227.9	3823	103.23	4.4	3840	8.72	1.7	16268	53.5	115658	51.8	53.8	114.73	9.36	5.9	216.98	365.97	97.27	58.1	104	3.5	2.88	4.97	Heilongjiang	0.87	0.45
Heilongjiang	2007	106.09	1.2	0.6	3.97	1.72	10245.3	4132.3	729.6	272.5	9.7	8.7	2090	6.7	58.1	444.1	2359.2	3824	102.12	4.3	3436	8.96	1.75	18510	53.9	108972	51.5	52.1	105.42	7.41	5.62	238.81	479.82	121.72	74.22	102	4.17	3.32	4.36	Heilongjiang	1.2	0.6
Heilongjiang	2008	102.28	0.81	0.4	4.24	1.87	11581.3	4855.6	864.9	351.1	10	9.1	2207	6.6	60	439	2337.8	3825	102.28	4.2	4486	9.71	1.74	21727	55.4	110996	50.6	46.9	95.71	7.87	6.86	295.64	623.8	148.2	86.54	102	4.22	3.75	4.16	Heilongjiang	0.81	0.4
Heilongjiang	2009	101.14	0.99	0.53	4.52	1.95	12566	5206.8	978.8	434.3	10.2	10.2	2420	5	65	534.1	2208.9	3826	103.31	4.3	4321	10.14	1.93	21665	55.5	110508	49	43.3	83.67	10.1	6.22	343.3	642.19	159.75	85.37	101	4.29	3.41	4.45	Heilongjiang	0.99	0.53
Heilongjiang	2010	95.84	0.78	0.48	6.3	2.27	13856.5	6210.7	948.4	443.2	8.9	10.1	2420	4.5	70	591.3	2152.1	3833	103.22	4.3	5239	10	2.09	22447	55.7	118575	49	42.2	80.9	10.24	6.03	420.29	692.99	185.57	94.9	101	4.05	2.87	3.535	Heilongjiang	0.78	0.48
Heilongjiang	2011	89.2	0.65	0.41	7.46	2.6	15696.2	7590.7	1083	573.6	9	10.8	2409	5.2	67	452	2282.6	3834	101.29	4.1	5146	11.14	2	29079	56.5	150661	52.19	65.59	82.08	10.59	6.24	441.68	807.37	204.51	109.62	99	4.48	3.72	2.62	Heilongjiang	0.65	0.41
Heilongjiang	2012	88.9	0.64	0.35	7.85	2.91	17759.8	8603.8	1180.7	727	9.1	12.7	2441	4.6	67	740.8	1773.8	3834	103.66	4.2	5054	11.26	2.05	35711	56.9	162589	51.43	69.93	67.64	10.91	6.33	463.23	857.79	213.69	112.2	94	3.96	3.44	2.44	Heilongjiang	0.64	0.35
Heilongjiang	2013	88.24	1.12	0.65	8.43	3.08	19597	9634.1	1334.8	839.2	9.4	12.3	2529	4.3	68	633.5	2023.5	3835	102.94	4.4	4922	12.62	2.13	37509	57.4	153090	48.91	72.25	67.2267	12.2067	6.38667	484.78	908.21	222.87	114.78	119	4.27333	3.46	2.18	Heilongjiang	1.12	0.65
Heilongjiang	2014	89.43	0.95	0.54	9.18	3.28	22609	10453.2	1457.6	992.1	8.9	12.7	2518	5.1	63	415.8	2055.9	3833	100.16	4.5	4946	12.78	2.12	39226	58	149644	47.22	79.35	66.8133	13.5033	6.44333	506.33	958.63	232.05	117.36	111	4.58667	3.48	2.73	Heilongjiang	0.95	0.54
Heilongjiang	2015	86.73	1.17		9.93	3.46	24202.6	11095.2	2007.5	1269.9	11.2	13.3	2427	5.6	64	420.1	2090.7	3812	101.59	4.5	5504	13.11	2.2	39462	58.8	148595	45.63	64.41	66.4	14.8	6.5	527.88	1009.05	241.23	119.94	103	4.9	3.5	2.74	Heilongjiang	1.17	0.43
Heilongjiang	2016	80.16			10.34	3.62	25736.4	11831.9	2007.5	1269.9	11.1	13.5	2427	5	69	537.8	2180.8	3799	102.11	4.2	5244	13.58	2.22	40431.6	59.2	138335	33.82	44.71	71.1	16.8	7.2	549.43	1059.47	250.41	122.52	74	5.4	5.1	3.6	Heilongjiang	1.275	0.32
Heilongjiang	2017	72.73	1.38		11.67	3.92	27446	12664.8	1966.7	1551.2	10.2	14.7	2403	5.1	64	480.8	2277.2	3789	103.83	4.2	5515	14.09	2.34	42699	59.4	138121	29.37	40.22	75.6	19.1	8.9	570.98	1109.89	259.59	125.1	84	5.5	5.9	2.89	Heilongjiang	1.38	0.21
Heilongjiang	2018	65.23	2.47		12.13	4.12	29191.3	13803.7	2466.5	1916.2	11.7	16.8	2405	5.1	64	651.3	2205.2	3773	102.93	4	5476	14.03	2.37	43274	60.1	137907	24.92	35.73	80	23.5	8.6	592.53	1160.31	268.77	127.68	65	6.3	5.1	2.34	Heilongjiang	2.47	0.1
